# Supplementary material for: Comparative Analysis of Gene Expression in Fibroblastic Foci in Patients with Idiopathic Pulmonary Fibrosis and Pulmonary Sarcoidosis
Source: MDPI journal article supplement (doi:10.3390/cells11040664), 2022-02-14
Supplement: s1 [file s1]

**Table S1. Clinical information of the study group.**

| <b>Patient #</b>         | <b>Sex</b> | <b>Age (years)</b>     | <b>Diagnosis</b> |
|--------------------------|------------|------------------------|------------------|
| 1                        | Female     | 57                     | UIP/IPF          |
| 2                        | Male       | 61                     | UIP/IPF          |
| 3                        | Male       | 43                     | UIP/IPF          |
| 4                        | Male       | 56                     | UIP/IPF          |
| 5                        | Male       | 64                     | UIP/IPF          |
| 6                        | Male       | 63                     | UIP/IPF          |
| <b>Median (IQR25-75)</b> |            | <b>59 (56.25-62.5)</b> |                  |
| 7                        | Female     | 65                     | Sarcoidosis      |
| 8                        | Female     | 32                     | Sarcoidosis      |
| 9                        | Male       | 55                     | Sarcoidosis      |
| 10                       | Male       | 53                     | Sarcoidosis      |
| 11                       | Male       | 58                     | Sarcoidosis      |
| 12                       | Female     | 57                     | Sarcoidosis      |
| <b>Median (IQR25-75)</b> |            | <b>56 (53.5-57.8)</b>  |                  |
| 13-33                    | N/A*       | N/A*                   | Healthy controls |

UIP, usual interstitial pneumonia; IPF, idiopathic pulmonary fibrosis; IQR, interquartile range; N/A, not available; \*information not publicly accessible due to data protection regulations and respecting the anonymity of donors
