# Supplementary material for: Comparative Analysis of Gene Expression in Fibroblastic Foci in Patients with Idiopathic Pulmonary Fibrosis and Pulmonary Sarcoidosis
Source: MDPI journal article supplement (doi:10.3390/cells11040664), 2022-02-14
Supplement: s1 [file s1]

**Table S2. Target antibodies used for immunohistochemistry**

| <b>Target of antibody</b> | <b>Product name</b>                                          | <b>Host species</b> | <b>Pretreatment</b> | <b>Dilution</b> | <b>Manufacturer</b> |
|---------------------------|--------------------------------------------------------------|---------------------|---------------------|-----------------|---------------------|
| <b>FAP</b>                | Anti-Fibroblast activation protein, alpha antibody (ab53066) | Rabbit              | Tris-EDTA buffer    | 1:100           | Abcam               |
| <b>MMP7</b>               | Recombinant Anti-MMP7 antibody [EPR17888-101] (ab205525)     | Rabbit              | Tris-EDTA buffer    | 1:500           | Abcam               |
| <b>VCAM1</b>              | Recombinant Anti-VCAM1 antibody [EPR5047] (ab134047)         | Rabbit              | Tris-EDTA buffer    | 1:500           | Abcam               |
| <b>CD86</b>               | Anti-CD86 antibody [EP1158Y] - N-terminal (ab53004)          | Rabbit              | Tris-EDTA buffer    | 1:200           | Abcam               |
| <b>Collagen V</b>         | Anti-Collagen V antibody (ab7046)                            | Rabbit              | Tris-EDTA buffer    | 1:100           | Abcam               |
| <b>Collagen VI</b>        | Recombinant Anti-Collagen VI antibody [EPR17072] (ab182744)  | Rabbit              | Tris-EDTA buffer    | 1:200           | Abcam               |
| <b>Ki-67</b>              | Ki-67 Recombinant Monoclonal Antibody (SP6)                  | Rabbit              | Tris-EDTA buffer    | 1:100           | Thermo Scientific   |

FAP, fibroblast activation protein alpha; MMP7, matrix metalloproteinase 7; VCAM1, vascular cell adhesion molecule 1; CD86, cluster of differentiation 86; Ki-67, marker of proliferation Ki-67;
