# Supplementary material for: Comparative Analysis of Gene Expression in Fibroblastic Foci in Patients with Idiopathic Pulmonary Fibrosis and Pulmonary Sarcoidosis
Source: MDPI journal article supplement (doi:10.3390/cells11040664), 2022-02-14
Supplement: s1 [file s1]

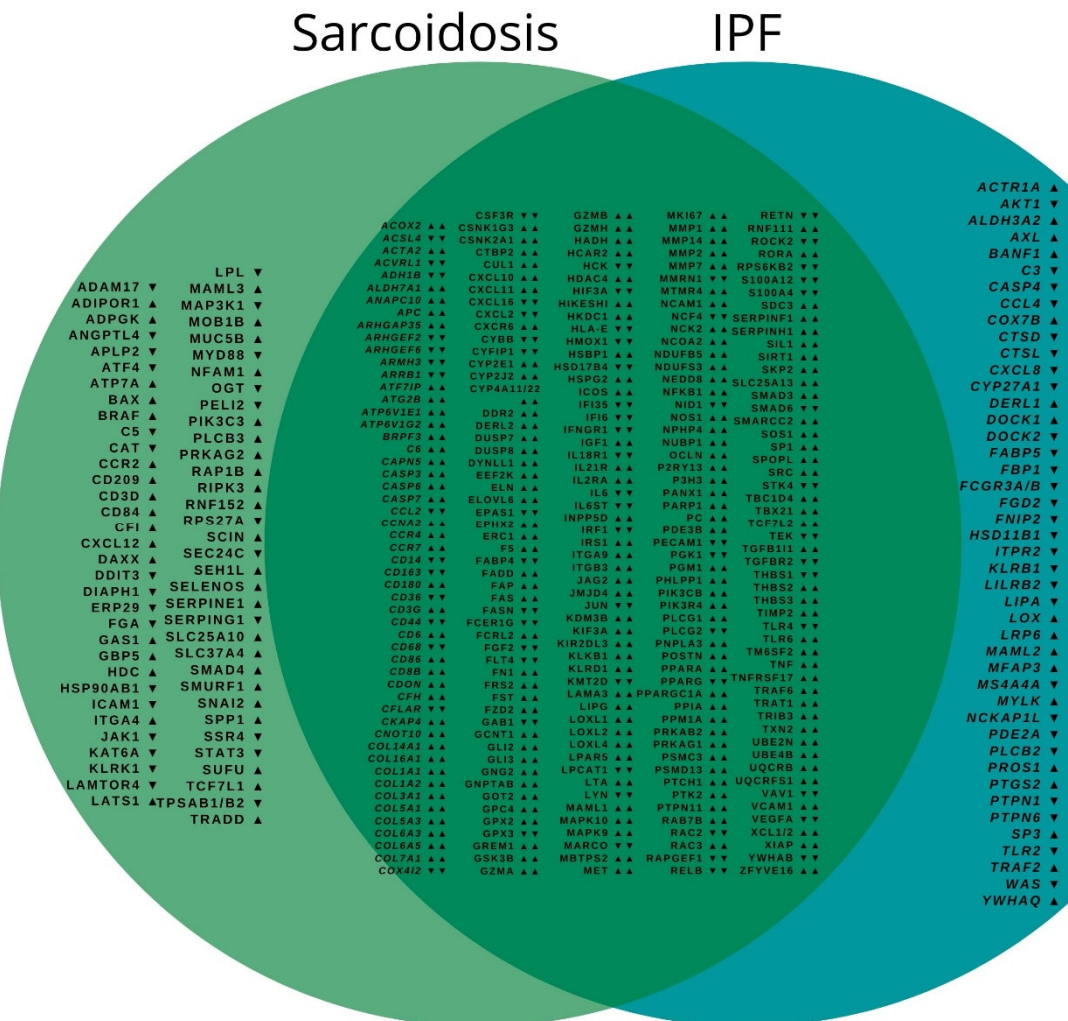

**Figure S1. Venn diagram of differentially regulated genes.** Arrows indicate significantly increased (arrow up) or significantly decreased (arrow down) expression of the respective genes compared to controls in fibroblastic foci from both disease entities compared to healthy control lungs. False discovery rate (fdr) values <0.05 were considered as statistically significant. In the overlapping area (middle), left and right arrow indicate the expression in sarcoidosis and IPF, respectively. IPF, idiopathic pulmonary fibrosis.
