# Supplementary material for: Comparative Analysis of Gene Expression in Fibroblastic Foci in Patients with Idiopathic Pulmonary Fibrosis and Pulmonary Sarcoidosis
Source: Cells. 2022 Feb 14;11(4):664. doi: 10.3390/cells11040664 (PMC8870272; doi:10.3390/cells11040664)
Supplement: Supplementary file 1 [file cells-11-00664-s001.zip › Supplementary files/Table S3.xlsx]

## Sheet: Tabelle1
File Name			20211116_FIBROSE PANEL Fibrocytaere Foci_01 13 25614_01.RCC	20211116_FIBROSE PANEL Fibrocytaere Foci_02 11 20219_02.RCC	20211116_FIBROSE PANEL Fibrocytaere Foci_06 19 3752_06.RCC	20211116_FIBROSE PANEL Fibrocytaere Foci_10 21 8382_10.RCC	20211116_FIBROSE PANEL Fibrocytaere Foci_11 16 31198_11.RCC	20211116_FIBROSE PANEL Fibrocytaere Foci_12 14 18259_12.RCC	20211116_FIBROSE PANEL Fibrocytaere Foci_03 15 24661_03.RCC	20211116_FIBROSE PANEL Fibrocytaere Foci_04 20 1501_04.RCC	20211116_FIBROSE PANEL Fibrocytaere Foci_05 15 28672_05.RCC	20211124_Fibrose Panel Downsizing lungs 2_12 H21 24371_12.RCC	20211116_FIBROSE PANEL Fibrocytaere Foci_08 14 853_08.RCC	20211116_FIBROSE PANEL Fibrocytaere Foci_09 15 25401_09.RCC	20211124_Fibrose Panel Downsizing lungs 2_01 EX09 29113_01.RCC	20211124_Fibrose Panel Downsizing lungs 2_02 EX09 29774_02.RCC	20211124_Fibrose Panel Downsizing lungs 2_03 EX10 23010_03.RCC	20211124_Fibrose Panel Downsizing lungs 2_04 EX10 28198_04.RCC	20211124_Fibrose Panel Downsizing lungs 2_06 EX12 14271_06.RCC	20211124_Fibrose Panel Downsizing lungs 2_07 EX12 14940_07.RCC	20211124_Fibrose Panel Downsizing lungs 2_08 EX13 8630_08.RCC	20211124_Fibrose Panel Downsizing lungs 2_09 EX14 2631_09.RCC	20211124_Fibrose Panel Downsizing lungs 2_10 EX14 6052_10.RCC	20211124_Fibrose Panel Downsizing lungs 2_11 EX15 7340_11.RCC	20211019_FIBROSR Panel Downsizing Lungen_02 EX16 20926 2_02.RCC	20211019_FIBROSR Panel Downsizing Lungen_03 EX16 26961 4_03.RCC	20211019_FIBROSR Panel Downsizing Lungen_04 EX17 11580 ll2_04.RCC	20211019_FIBROSR Panel Downsizing Lungen_05 H18 27505 lll3_05.RCC	20211019_FIBROSR Panel Downsizing Lungen_06 H19 12402 lllNE6_06.RCC	20211019_FIBROSR Panel Downsizing Lungen_07 H19 20674 lll25_07.RCC	20211019_FIBROSR Panel Downsizing Lungen_08 H19 32157 4_08.RCC	20211019_FIBROSR Panel Downsizing Lungen_09 H20 19571 6_09.RCC	20211019_FIBROSR Panel Downsizing Lungen_10 H21 2146 5_10.RCC	20211019_FIBROSR Panel Downsizing Lungen_11 H21 7664 lll25_11.RCC	20211019_FIBROSR Panel Downsizing Lungen_12 H21 18718 1_12.RCC
Description			Sarcoidosis	Sarcoidosis	Sarcoidosis	Sarcoidosis	Sarcoidosis	Sarcoidosis	IPF	IPF	IPF	IPF	IPF	IPF	DS lung	DS lung	DS lung	DS lung	DS lung	DS lung	DS lung	DS lung	DS lung	DS lung	DS lung	DS lung	DS lung	DS lung	DS lung	DS lung	DS lung	DS lung	DS lung	DS lung	DS lung
Sample ID			01 13 25614	02 11 20219	06 19 3752	10 21 8382	11 16 31198	12 14 18259	03 15 24661	04 20 1501	05 15 28672	12 H21 24371	08 14 853	09 15 25401	01 EX09 29113	02 EX09 29774	03 EX10 23010	04 EX10 28198	06 EX12 14271	07 EX12 14940	08 EX13 8630	09 EX14 2631	10 EX14 6052	11 EX15 7340	02 EX16 20926 2	03 EX16 26961 4	04 EX17 11580 ll2	05 H18 27505 lll3	06 H19 12402 lllNE6	07 H19 20674 lll25	08 H19 32157 4	09 H20 19571 6	10 H21 2146 5	11 H21 7664 lll25	12 H21 18718 1
Owner
Sample Date			11/16/2021	11/16/2021	11/16/2021	11/16/2021	11/16/2021	11/16/2021	11/16/2021	11/16/2021	11/16/2021	11/24/2021	11/16/2021	11/16/2021	11/24/2021	11/24/2021	11/24/2021	11/24/2021	11/24/2021	11/24/2021	11/24/2021	11/24/2021	11/24/2021	11/24/2021	10/19/2021	10/19/2021	10/19/2021	10/19/2021	10/19/2021	10/19/2021	10/19/2021	10/19/2021	10/19/2021	10/19/2021	10/19/2021
File Version			1.7	1.7	1.7	1.7	1.7	1.7	1.7	1.7	1.7	1.7	1.7	1.7	1.7	1.7	1.7	1.7	1.7	1.7	1.7	1.7	1.7	1.7	1.7	1.7	1.7	1.7	1.7	1.7	1.7	1.7	1.7	1.7	1.7
Gene RLF			NS_HS_FIBROSIS_V2.0	NS_HS_FIBROSIS_V2.0	NS_HS_FIBROSIS_V2.0	NS_HS_FIBROSIS_V2.0	NS_HS_FIBROSIS_V2.0	NS_HS_FIBROSIS_V2.0	NS_HS_FIBROSIS_V2.0	NS_HS_FIBROSIS_V2.0	NS_HS_FIBROSIS_V2.0	NS_HS_FIBROSIS_V2.0	NS_HS_FIBROSIS_V2.0	NS_HS_FIBROSIS_V2.0	NS_HS_FIBROSIS_V2.0	NS_HS_FIBROSIS_V2.0	NS_HS_FIBROSIS_V2.0	NS_HS_FIBROSIS_V2.0	NS_HS_FIBROSIS_V2.0	NS_HS_FIBROSIS_V2.0	NS_HS_FIBROSIS_V2.0	NS_HS_FIBROSIS_V2.0	NS_HS_FIBROSIS_V2.0	NS_HS_FIBROSIS_V2.0	NS_HS_FIBROSIS_V2.0	NS_HS_FIBROSIS_V2.0	NS_HS_FIBROSIS_V2.0	NS_HS_FIBROSIS_V2.0	NS_HS_FIBROSIS_V2.0	NS_HS_FIBROSIS_V2.0	NS_HS_FIBROSIS_V2.0	NS_HS_FIBROSIS_V2.0	NS_HS_FIBROSIS_V2.0	NS_HS_FIBROSIS_V2.0	NS_HS_FIBROSIS_V2.0
Comments
Lane ID			1	2	6	10	11	12	3	4	5	12	8	9	1	2	3	4	6	7	8	9	10	11	2	3	4	5	6	7	8	9	10	11	12
FOV Count			555	555	555	555	555	555	555	555	555	555	555	555	555	555	555	555	555	555	555	555	555	555	555	555	555	555	555	555	555	555	555	555	555
FOV Counted			494	549	544	547	548	507	552	548	552	548	537	546	538	550	535	543	548	543	547	539	538	542	541	547	534	543	475	540	537	538	542	527	526
Scanner ID			1309C0112	1309C0112	1309C0112	1309C0112	1309C0112	1309C0112	1309C0112	1309C0112	1309C0112	1309C0112	1309C0112	1309C0112	1309C0112	1309C0112	1309C0112	1309C0112	1309C0112	1309C0112	1309C0112	1309C0112	1309C0112	1309C0112	1309C0112	1309C0112	1309C0112	1309C0112	1309C0112	1309C0112	1309C0112	1309C0112	1309C0112	1309C0112	1309C0112
Stage Position			1	1	1	1	1	1	1	1	1	2	1	1	2	2	2	2	2	2	2	2	2	2	2	2	2	2	2	2	2	2	2	2	2
Binding Density			0.14	0.12	0.26	0.17	0.23	0.19	0.18	0.32	0.12	0.38	0.09	0.27	0.21	0.22	0.18	0.16	0.22	0.2	0.23	0.23	0.2	0.19	0.29	0.34	0.52	0.28	0.4	0.6	0.47	0.53	0.63	0.75	1.04
Messages
Positive	POS_A	ERCC_00117.1	8640	12194	11034	10507	11906	12059	13654	13556	10057	15288	10640	13292	13347	15637	12637	13202	15595	13334	13804	13008	13349	8354	24421	29097	33561	36573	28128	30462	33987	31880	27704	28226	25695
Positive	POS_B	ERCC_00112.1	1843	2782	2251	2455	2950	2880	3256	3408	2227	2732	2614	3771	3307	3930	3280	3571	4082	3509	3566	3394	3676	2155	6492	8089	9654	10242	7924	8332	9254	9193	7850	7883	7179
Positive	POS_C	ERCC_00002.1	652	951	814	901	1001	907	1093	1163	808	996	875	1161	980	1243	987	1045	1248	1054	1092	1010	1043	644	2020	2184	2720	2880	2257	2426	2722	2693	2271	2210	2075
Positive	POS_D	ERCC_00092.1	170	235	233	250	226	252	271	306	203	280	220	310	237	286	239	238	270	248	243	215	266	153	530	491	628	689	514	540	668	652	528	548	519
Positive	POS_E	ERCC_00035.1	30	35	37	28	39	44	44	42	28	46	27	46	44	40	30	33	46	42	37	31	41	33	62	80	103	116	92	97	106	105	89	83	97
Positive	POS_F	ERCC_00034.1	15	11	16	17	16	21	25	25	9	21	18	16	23	21	20	22	17	28	19	13	23	10	37	36	44	51	38	50	52	61	33	44	35
Negative	NEG_A	ERCC_00096.1	1	1	3	1	3	1	1	5	2	1	1	3	7	2	1	7	5	3	2	3	4	1	4	13	5	10	8	8	10	14	10	9	11
Negative	NEG_B	ERCC_00041.1	8	5	41	13	14	18	10	39	7	36	3	56	1	3	1	2	1	3	8	4	1	2	4	6	7	6	6	10	10	4	10	8	17
Negative	NEG_C	ERCC_00019.1	1	2	4	4	3	1	1	1	3	4	1	1	5	4	1	1	3	3	6	2	1	1	6	10	13	9	8	14	17	11	16	24	10
Negative	NEG_D	ERCC_00076.1	1	1	1	1	2	1	1	1	2	3	1	1	1	1	1	3	3	1	5	1	2	2	3	4	6	6	5	8	6	9	8	9	12
Negative	NEG_E	ERCC_00098.1	1	3	6	4	3	4	2	5	2	2	4	2	1	2	8	1	4	7	3	4	4	1	4	13	16	15	14	7	7	5	8	10	11
Negative	NEG_F	ERCC_00126.1	4	1	11	3	12	12	9	21	4	20	3	17	4	8	4	3	4	2	4	2	2	1	11	13	13	15	17	21	15	15	19	17	19
Negative	NEG_G	ERCC_00144.1	1	1	3	1	1	1	1	2	1	2	1	1	1	1	1	1	1	1	1	1	2	1	2	6	1	4	3	5	4	1	3	5	6
Negative	NEG_H	ERCC_00154.1	2	1	5	1	1	2	4	3	1	5	1	3	2	3	3	3	1	7	2	3	1	1	4	10	5	9	4	5	11	4	8	7	10
Endogenous	ABCA1	NM_005502.3	188	189	272	208	376	113	233	479	99	529	19	187	181	242	115	136	305	231	337	374	166	243	544	1109	1357	656	2197	686	1401	1164	1666	1230	2913
Endogenous	ABCB11	NM_003742.2	52	59	98	61	15	20	92	95	48	39	7	33	5	3	2	1	7	1	3	3	2	3	8	11	7	5	4	10	13	6	7	6	13
Endogenous	ACAA2	NM_006111.2	76	56	123	77	76	46	131	228	44	152	10	119	48	104	34	61	89	70	92	90	95	76	331	448	503	422	297	628	692	430	638	532	697
Endogenous	ACACA	NM_198834.1	12	12	30	17	35	29	29	45	4	62	2	42	40	37	12	7	15	24	40	51	35	34	59	117	276	37	95	199	116	136	230	288	318
Endogenous	ACACB	NM_001093.3	41	55	76	51	37	23	82	180	30	84	3	38	17	49	26	5	40	44	60	52	50	43	310	95	190	93	192	329	256	560	455	533	266
Endogenous	ACOX2	NM_003500.3	42	46	82	52	25	25	87	100	37	58	5	40	4	15	3	1	3	1	14	10	6	4	34	11	42	5	24	39	22	39	23	50	27
Endogenous	ACSL4	NM_004458.2	26	34	103	66	84	47	94	134	26	122	6	75	141	99	48	44	134	113	91	134	79	70	203	396	724	146	492	863	379	387	777	843	1636
Endogenous	ACSM3	NM_005622.3	49	37	88	56	26	25	71	109	30	60	5	36	23	33	19	7	17	16	33	59	34	34	30	138	401	136	99	316	195	166	239	210	148
Endogenous	ACTA2	NM_001613.1	713	330	5622	2589	3297	1088	1541	2419	1119	3413	270	4794	535	518	490	95	965	437	1336	1699	1040	910	28511	1221	6251	2082	2943	7759	3964	4968	4805	2034	9110
Endogenous	ACTR1A	NM_005736.3	120	87	370	222	308	148	233	510	88	605	23	314	194	192	105	54	162	191	247	226	169	164	757	583	1226	346	522	1521	832	1212	1731	1935	2017
Endogenous	ACVRL1	NM_000020.1	58	45	88	72	48	33	86	304	41	70	4	59	456	311	178	100	182	200	255	220	259	236	151	595	2016	159	730	2356	639	3211	2253	3755	2829
Endogenous	ADA2	NM_001282229.1	95	73	168	122	71	48	147	178	42	117	3	94	54	111	42	40	137	59	73	103	95	83	178	455	521	297	234	464	548	559	671	481	567
Endogenous	ADAM17	NM_003183.4	129	137	314	197	194	149	253	405	140	426	17	213	313	511	447	230	407	427	383	468	303	246	354	679	1332	695	1068	1272	1661	1109	1543	1952	2181
Endogenous	ADAM9	NM_001005845.1	46	79	326	161	308	153	175	570	84	546	26	343	183	229	134	71	144	163	468	281	209	170	463	832	1520	424	728	1543	814	1416	1237	1216	1800
Endogenous	ADCY7	NM_001114.4	67	45	87	63	56	59	80	112	23	92	4	45	83	113	54	36	86	48	96	81	62	57	82	323	388	179	166	289	357	251	526	331	310
Endogenous	ADH1B	NM_000668.4	88	266	171	305	49	70	337	1034	119	195	17	400	982	1555	785	281	990	1634	3236	2092	962	1221	6056	1758	6374	1442	6429	13156	4680	12033	12973	13731	5494
Endogenous	ADH1C	NM_000669.3	3	7	25	1	7	3	7	21	4	58	1	7	1	3	8	11	12	9	39	23	8	51	32	8	147	23	149	54	37	51	159	100	37
Endogenous	ADH4	NM_000670.3	88	87	149	105	25	39	152	141	75	64	4	41	1	3	2	1	2	2	1	1	3	4	71	5	11	5	6	10	6	10	16	19	12
Endogenous	ADH6	NM_000672.3	36	30	45	51	10	10	70	65	27	14	1	32	2	5	1	1	2	2	1	3	1	1	4	7	5	7	6	14	8	7	3	40	10
Endogenous	ADIPOQ	NM_004797.2	45	52	75	67	12	16	83	97	37	64	3	25	2	1	2	1	1	5	3	1	1	1	7	3	7	7	5	12	9	5	7	6	4
Endogenous	ADIPOR1	NM_015999.3	70	76	148	93	37	38	127	149	70	49	13	91	53	50	25	16	29	43	48	67	35	44	55	207	197	130	101	270	194	231	272	228	213
Endogenous	ADPGK	NR_023318.1	115	75	229	165	177	108	167	268	78	279	17	166	261	252	95	62	161	106	160	192	121	175	189	503	854	200	379	966	510	716	957	1049	1237
Endogenous	AIM2	NM_004833.1	26	4	4	28	8	7	19	5	4	5	1	3	10	24	3	4	15	6	7	2	12	11	14	58	40	27	42	16	24	66	61	60	48
Endogenous	AKR1B10	NM_020299.3	66	59	122	99	26	24	125	128	60	121	5	62	1	2	2	2	6	3	1	1	1	1	14	3	12	2	2	3	8	2	9	7	12
Endogenous	AKT1	NM_001014432.1	118	101	324	164	273	173	215	383	92	385	12	264	538	440	208	173	315	223	434	441	340	267	495	821	1310	658	748	1462	1201	1147	1352	1426	1383
Endogenous	ALAD	NM_000031.5	3	9	48	17	24	9	21	39	5	80	4	20	26	42	22	20	29	25	49	45	28	24	77	77	125	68	59	141	146	172	165	137	142
Endogenous	ALDH3A2	NM_001031806.1	103	107	309	220	342	241	305	558	106	809	15	247	290	266	84	102	212	175	248	184	270	247	669	576	1347	418	791	1387	958	1232	1570	1908	2103
Endogenous	ALDH7A1	NM_001182.3	66	64	131	74	68	60	133	180	51	173	9	84	14	18	10	5	16	21	49	34	13	19	181	38	84	19	82	83	82	239	205	172	157
Endogenous	ALDH9A1	NM_000696.3	119	99	254	175	133	104	188	321	84	287	18	185	143	218	108	56	181	98	334	212	158	154	594	735	965	485	475	1083	872	973	1228	1091	1394
Endogenous	ALDOB	NM_000035.3	28	29	42	45	12	7	48	56	17	27	2	18	1	1	1	1	1	1	2	1	1	2	4	5	4	6	5	6	6	13	13	8	6
Endogenous	AMOTL1	NM_001301007.1	29	26	228	109	171	71	115	276	40	337	14	187	185	185	92	49	120	139	140	197	133	152	610	305	840	198	363	1042	447	1105	1392	1332	1326
Endogenous	AMOTL2	NM_016201.2	60	94	147	116	59	69	116	181	56	247	7	62	105	114	104	43	93	128	120	267	157	122	301	126	405	227	512	880	553	901	983	1333	482
Endogenous	ANAPC1	NM_022662.2	15	8	60	51	57	33	39	66	10	87	5	41	54	50	13	22	26	29	67	35	22	38	154	134	176	48	92	295	143	251	251	428	333
Endogenous	ANAPC10	NM_001256710.1	41	39	58	63	33	26	71	116	28	81	5	44	22	22	13	1	21	16	30	27	13	22	82	43	130	25	50	144	54	182	169	223	313
Endogenous	ANAPC7	NM_016238.2	10	7	37	28	31	20	22	48	7	74	1	29	28	33	14	5	24	14	37	26	26	25	110	109	222	46	76	226	118	186	167	220	262
Endogenous	ANGPTL4	NR_104213.1	11	22	24	7	25	18	17	117	13	98	2	65	190	95	39	44	71	84	239	60	79	31	117	117	196	52	386	844	156	299	58	145	1652
Endogenous	AP1G1	NM_001030007.1	40	35	173	116	146	75	106	247	44	268	11	157	202	165	113	38	96	114	187	196	90	131	331	389	806	142	423	979	412	897	972	1194	1454
Endogenous	AP1S1	NM_001283.3	27	19	157	84	192	58	72	184	17	319	16	149	40	112	33	22	58	39	153	119	93	66	137	344	412	186	212	527	408	437	413	474	711
Endogenous	AP2S1	NM_021575.2	133	72	273	182	241	135	176	354	65	453	16	263	232	335	168	107	264	141	470	319	236	192	454	1185	1299	1051	607	1746	1432	842	1179	985	1559
Endogenous	APC	NM_000038.3	40	38	95	53	38	40	77	101	32	83	7	56	51	39	18	14	21	13	38	60	45	26	103	84	160	45	72	224	118	189	220	247	172
Endogenous	APCS	NM_001639.3	55	56	96	82	27	25	108	113	49	74	4	47	2	3	1	1	2	2	3	3	1	3	5	12	13	11	3	10	11	11	8	5	13
Endogenous	APLP2	NM_001243299.1	242	195	861	515	824	487	591	1317	246	1621	44	959	947	1034	570	408	980	1032	950	1313	792	883	2502	2911	5167	1971	3170	5956	4686	6127	8587	9255	8299
Endogenous	APOA1	NM_000039.1	48	45	78	53	3	22	74	91	45	26	2	28	4	1	1	1	5	5	8	5	5	3	2	11	23	9	11	31	26	44	35	19	10
Endogenous	APOA2	NM_001643.1	1	1	1	3	1	1	1	3	2	1	1	1	1	1	1	1	3	1	1	1	3	1	2	6	3	3	7	7	1	6	9	6	10
Endogenous	APOA4	NM_000482.3	27	37	30	28	8	10	41	44	19	10	3	7	5	1	2	1	5	2	1	2	1	1	5	9	1	1	2	4	9	4	4	7	6
Endogenous	APOB	NM_000384.2	37	43	61	54	12	24	75	95	46	22	1	31	2	2	1	1	2	3	4	3	2	1	94	13	9	4	6	12	10	12	15	14	14
Endogenous	APOC2	NM_000483.3	30	32	51	35	12	18	48	54	28	35	3	27	1	5	2	3	14	3	2	4	5	3	4	11	18	21	13	27	61	23	6	20	64
Endogenous	APOC3	NM_000040.1	25	18	42	24	3	11	43	46	26	17	2	10	3	3	1	1	2	1	1	1	1	1	2	9	15	3	3	7	5	7	10	11	14
Endogenous	APOH	NM_000042.2	17	15	34	35	15	13	42	27	12	28	1	27	2	6	4	1	1	7	2	10	8	2	5	12	51	3	40	46	41	56	102	110	51
Endogenous	APP	NM_000484.3	419	334	3067	1448	2653	1180	1232	2883	362	5569	132	2549	1250	1301	934	349	918	1010	1602	1750	1180	991	3659	2396	6928	1693	3391	8228	3754	10495	10633	9855	10258
Endogenous	AQP8	NM_001169.2	2	5	6	5	2	1	8	5	4	3	1	2	3	1	1	2	1	2	1	1	2	1	3	6	9	6	3	9	7	17	7	9	12
Endogenous	ARG1	NM_000045.3	2	2	4	1	4	1	2	9	1	4	1	1	5	7	11	26	8	48	10	14	8	22	24	17	60	32	39	147	78	45	370	414	108
Endogenous	ARHGAP35	NM_004491.4	78	85	237	164	178	81	178	315	71	359	23	188	120	144	48	21	80	83	169	168	115	131	570	362	788	156	341	985	496	802	1258	1462	1062
Endogenous	ARHGEF2	NM_004723.2	112	105	248	118	175	109	167	374	87	287	17	212	465	334	183	196	291	377	323	418	337	313	621	861	1535	688	1055	1381	1639	1232	1939	1654	1287
Endogenous	ARHGEF6	NM_004840.2	27	15	59	52	39	30	43	85	14	76	2	41	136	113	54	24	100	118	107	145	84	144	353	243	691	145	406	853	356	1208	1315	2081	969
Endogenous	ARRB1	NM_004041.3	55	36	122	70	142	87	96	303	41	217	5	69	312	392	240	252	377	341	354	529	476	424	228	1247	2080	1049	990	2327	1961	2945	3809	2946	1544
Endogenous	ATF4	NM_001675.2	532	500	1539	973	1124	654	1172	2218	344	1923	89	1165	2194	1975	1157	718	1780	1864	1534	2081	1454	1480	3409	2746	6747	2623	4532	8292	6098	7480	9336	11891	9542
Endogenous	ATF7IP	NM_018179.3	114	88	260	182	196	134	232	324	85	396	8	232	119	129	65	18	101	85	181	163	100	133	446	285	628	145	363	657	363	847	739	924	574
Endogenous	ATG101	NM_021934.4	87	71	177	87	111	81	123	195	65	185	7	131	166	135	62	61	112	101	114	174	116	109	221	220	413	184	345	529	378	735	463	615	743
Endogenous	ATG2B	NM_018036.5	60	58	127	84	83	37	102	160	40	183	4	96	65	73	38	13	27	59	56	79	37	82	199	114	324	37	175	408	129	473	424	607	546
Endogenous	ATOX1	NM_004045.3	48	25	150	105	182	76	72	198	19	280	13	189	107	149	64	35	100	67	224	117	94	119	324	907	661	304	289	961	476	662	661	761	964
Endogenous	ATP6V1E1	NM_001039367.1	290	225	670	386	476	336	518	930	214	919	41	595	486	506	279	141	283	326	449	508	347	373	1756	1198	2016	497	1041	2665	1230	2425	2763	3488	3049
Endogenous	ATP6V1F	NM_001198909.1	354	223	724	530	779	347	455	1002	156	1265	46	624	533	1059	435	341	725	425	786	769	519	572	1192	2255	3283	1649	1667	3236	3192	2288	3066	2837	3650
Endogenous	ATP6V1G2	NM_130463.2	73	66	109	66	22	36	100	132	51	45	3	63	7	3	4	1	4	8	11	12	3	4	17	9	15	15	22	22	24	24	40	29	21
Endogenous	ATP7A	NM_000052.4	68	42	120	35	45	41	115	77	47	55	6	43	22	40	20	18	44	39	40	42	39	37	93	110	201	113	135	168	239	184	253	244	214
Endogenous	AXL	NM_021913.2	115	84	415	246	302	250	280	559	98	531	44	480	236	198	196	83	211	289	229	293	123	154	689	248	654	335	738	1166	782	1114	1371	1141	1473
Endogenous	BANF1	NM_001143985.1	87	95	344	193	162	89	241	392	88	356	18	200	186	178	82	76	200	99	242	145	173	113	557	607	742	525	370	928	943	577	1010	821	1199
Endogenous	BAX	NM_138761.3	196	171	510	354	502	295	345	603	148	995	46	478	227	443	177	162	429	229	484	278	375	281	355	1229	1575	1158	771	1499	1616	1094	1638	1469	2012
Endogenous	BCAP31	NM_001139457.1	64	38	263	149	272	84	136	359	23	554	7	163	156	322	174	110	316	156	311	222	256	228	449	851	1112	718	560	1509	1359	1242	1610	1578	2018
Endogenous	BCL2	NM_000657.2	110	80	123	99	47	58	126	139	44	79	9	60	110	130	63	83	202	92	95	112	130	78	359	187	293	348	310	278	471	407	437	348	302
Endogenous	BCL2L1	NM_138578.1	155	148	446	270	355	247	374	565	150	802	45	376	821	605	469	270	398	455	403	618	391	332	464	877	1628	635	1197	2088	1241	2302	2216	2801	2634
Endogenous	BIRC3	NM_182962.1	54	54	66	45	17	25	74	66	30	42	4	12	84	81	80	76	144	174	34	66	84	35	37	202	175	134	86	110	329	240	215	200	394
Endogenous	BLK	NM_001715.2	4	7	3	17	4	4	13	4	4	8	2	7	7	6	5	1	9	7	11	6	5	7	2	15	8	25	19	19	44	23	41	46	29
Endogenous	BMP10	NM_014482.1	1	2	1	1	2	1	1	4	1	1	1	1	1	3	1	1	1	1	3	1	1	1	3	2	4	2	2	8	8	2	3	8	4
Endogenous	BPI	NM_001725.2	1	3	6	7	6	4	2	5	3	8	2	9	3	5	2	2	2	2	3	5	1	3	25	10	50	5	12	60	23	24	14	23	62
Endogenous	BRAF	NM_004333.3	92	84	206	132	103	67	166	196	83	204	8	125	127	99	71	38	80	133	101	137	80	90	286	232	511	146	393	598	384	630	661	836	852
Endogenous	BRPF3	NM_015695.2	27	30	76	47	46	28	63	80	21	70	4	51	42	28	13	5	19	24	28	44	29	30	93	68	140	27	73	195	67	160	184	224	218
Endogenous	BST2	NM_004335.2	234	169	287	484	330	157	379	427	73	591	26	103	649	770	209	185	616	287	494	411	762	289	1763	1618	2187	746	1141	2313	1684	2405	2129	1720	2444
Endogenous	C1S	NM_001734.2	277	127	600	698	714	323	467	975	142	1120	46	821	299	346	221	47	333	336	614	559	338	321	2540	1036	1982	622	1675	2569	1035	3820	2329	2987	3874
Endogenous	C3	NM_000064.2	102	156	205	391	380	122	223	477	52	503	13	131	404	342	142	31	325	312	259	550	303	228	1535	1667	2126	609	1135	1660	1520	2391	3202	2478	6846
Endogenous	C3AR1	NM_004054.2	86	61	129	108	100	60	94	149	53	105	6	33	124	160	36	25	115	68	126	86	122	60	171	579	625	404	505	421	559	484	671	431	552
Endogenous	C4BPA	NM_000715.3	38	13	59	45	48	59	89	198	34	98	8	91	147	444	159	18	98	337	40	89	79	295	2	314	487	342	958	2275	754	366	862	923	1169
Endogenous	C5	NM_001735.2	9	2	5	8	17	13	21	46	3	16	1	29	30	51	10	9	21	19	38	54	41	21	44	179	161	68	154	356	141	171	222	368	312
Endogenous	C6	NM_000065.2	74	66	158	82	39	33	140	156	65	132	6	65	7	6	7	8	8	13	49	33	11	51	252	49	52	13	80	46	48	123	124	48	172
Endogenous	C8A	NM_000562.2	37	47	60	71	15	26	105	102	50	41	3	43	3	1	1	1	1	2	4	3	1	3	10	8	8	6	7	13	17	12	14	6	11
Endogenous	C8B	NM_000066.2	36	24	45	22	10	12	53	62	15	16	3	12	6	25	1	1	4	1	1	3	7	2	2	5	29	6	6	32	13	57	11	46	23
Endogenous	C9	NM_001737.3	62	53	97	82	13	23	111	101	39	53	6	41	4	2	2	1	2	1	1	9	1	1	4	1	10	9	13	9	13	25	15	11	7
Endogenous	CALM1	NM_006888.3	48	51	155	102	145	68	130	257	48	196	18	227	201	121	74	29	59	109	147	133	94	114	844	225	768	97	306	802	339	894	1016	1220	1251
Endogenous	CAPN5	NM_004055.4	83	100	159	66	53	47	172	167	76	107	4	52	16	40	10	7	42	10	60	39	40	11	71	103	112	121	72	51	83	61	66	57	159
Endogenous	CARD9	NM_052814.3	45	40	55	53	20	25	62	67	32	39	2	13	25	43	20	29	68	19	35	30	43	35	17	133	95	106	63	129	175	116	169	89	130
Endogenous	CASP12	NR_034061.1	38	46	46	48	9	18	58	49	36	31	5	22	1	1	2	1	1	3	6	2	2	1	11	9	19	11	6	16	14	20	21	18	19
Endogenous	CASP3	NM_004346.3	83	71	164	127	101	64	147	248	59	183	8	144	108	84	34	35	50	64	116	115	62	82	183	368	458	184	241	458	259	441	441	483	713
Endogenous	CASP4	NM_001225.3	111	86	214	201	126	87	139	283	71	277	10	150	315	215	103	154	321	193	260	229	160	158	250	718	1186	595	896	986	1263	802	1351	1457	1505
Endogenous	CASP6	NM_032992.2	71	85	163	103	78	57	125	178	71	191	12	108	35	55	23	15	42	38	102	75	74	52	59	202	290	150	134	300	265	201	257	296	274
Endogenous	CASP7	NM_001227.3	47	53	117	55	61	29	95	141	29	122	9	78	104	53	26	32	45	49	56	78	32	39	67	147	240	59	126	300	165	315	321	472	568
Endogenous	CASP8	NM_001228.4	90	83	182	129	89	70	171	196	56	187	8	106	165	195	121	114	185	118	159	129	163	170	120	384	550	264	492	627	622	624	1167	1058	703
Endogenous	CAT	NM_001752.2	113	111	274	193	198	104	239	744	73	691	13	209	267	523	169	105	220	330	435	442	481	429	620	955	2239	624	803	3569	1919	2062	3395	3114	3134
Endogenous	CBL	NM_005188.2	138	117	232	124	163	80	214	263	120	157	15	146	134	150	84	162	190	124	172	165	241	128	258	450	572	684	391	429	688	516	682	546	558
Endogenous	CCL13	NM_005408.2	67	65	108	122	89	32	175	230	59	140	7	39	72	111	22	29	67	17	89	61	157	43	120	1196	704	278	102	395	225	81	232	250	225
Endogenous	CCL19	NM_006274.2	297	63	82	308	22	31	195	86	48	36	4	22	185	78	27	17	797	27	90	92	62	58	261	468	219	784	68	27	379	219	80	72	732
Endogenous	CCL2	NM_002982.3	38	33	144	60	166	11	109	84	40	121	5	52	1251	270	219	177	977	919	344	305	111	104	672	700	1380	199	1704	1745	1077	226	356	745	3360
Endogenous	CCL4	NM_002984.2	43	29	39	69	51	43	58	39	7	70	2	31	71	188	91	62	432	491	50	108	101	81	87	349	376	83	202	394	354	721	387	847	748
Endogenous	CCN2	NM_001901.2	631	229	757	1075	650	611	794	1344	231	1354	81	354	1104	833	595	362	1104	927	1106	2735	1464	1013	6957	909	4562	1607	6039	8279	6115	14307	13364	16865	12355
Endogenous	CCNA2	NM_001237.2	54	49	93	67	34	19	78	117	36	83	2	63	2	15	1	5	8	2	128	66	20	10	22	166	104	72	44	112	69	58	67	49	96
Endogenous	CCR1	NM_001295.2	73	61	115	80	34	27	129	108	49	80	9	31	66	96	19	26	71	36	77	48	62	35	121	544	485	191	153	545	384	178	396	324	617
Endogenous	CCR2	NM_001123041.2	87	73	116	66	20	30	119	142	56	59	2	53	29	45	5	15	34	21	34	31	48	33	5	126	164	119	76	121	185	134	406	207	111
Endogenous	CCR4	NM_005508.4	74	71	116	125	41	40	141	152	76	60	7	50	27	11	10	1	31	8	9	10	28	12	8	49	87	63	99	47	64	149	65	178	97
Endogenous	CCR7	NM_001838.2	55	34	54	47	12	16	59	58	23	35	7	23	9	18	1	3	25	15	8	8	16	8	7	44	28	117	45	18	31	19	26	22	32
Endogenous	CCS	NM_005125.1	78	56	197	75	140	71	110	201	50	211	11	144	104	157	81	90	159	80	213	150	159	105	336	567	538	478	380	474	605	605	592	474	553
Endogenous	CD14	NM_000591.2	169	97	339	313	428	110	210	252	48	366	15	95	715	856	298	351	757	345	602	556	1060	519	1232	2917	3605	2558	1405	2688	3888	2036	3573	1760	2869
Endogenous	CD163	NM_004244.4	173	148	209	224	629	139	152	527	71	486	10	70	359	575	386	246	265	406	1557	724	386	581	1081	8650	3628	3852	2953	6239	5777	3130	4747	4101	7481
Endogenous	CD180	NM_005582.2	64	59	101	77	26	32	84	101	56	55	3	39	26	26	7	10	13	9	48	15	14	22	15	145	102	114	74	92	314	61	65	61	85
Endogenous	CD19	XM_011545981.1	41	29	66	29	7	16	57	52	33	14	4	18	2	2	1	1	3	6	2	1	6	11	2	18	13	19	10	12	19	10	13	12	6
Endogenous	CD209	NM_001144899.1	53	55	65	69	31	35	88	77	31	32	4	29	20	50	5	7	46	11	13	30	97	19	141	315	218	189	94	85	210	61	99	85	309
Endogenous	CD244	NM_001166663.1	43	51	61	50	6	19	80	73	31	27	3	21	1	9	1	3	1	2	3	1	2	4	4	11	11	10	4	1	10	3	26	1	12
Endogenous	CD34	NM_001025109.1	48	46	75	44	12	22	72	124	24	29	2	27	161	88	61	12	67	47	141	234	69	30	197	118	272	122	205	297	586	243	523	300	340
Endogenous	CD36	NM_000072.3	89	101	160	109	145	50	149	356	67	152	10	79	271	541	236	69	217	213	782	800	440	469	2663	1680	2837	720	1286	5030	2273	2236	3139	3246	4089
Endogenous	CD3D	NM_000732.4	71	71	147	118	34	63	131	129	69	51	6	40	52	73	17	25	93	39	22	18	49	33	10	137	172	159	162	70	185	206	248	234	136
Endogenous	CD3E	NM_000733.2	41	27	27	49	26	29	50	42	6	11	4	11	54	75	32	19	82	32	28	17	58	25	13	93	172	151	198	82	195	230	243	274	132
Endogenous	CD3G	NM_000073.2	55	53	58	54	12	29	97	93	43	47	4	27	10	24	8	6	29	5	5	2	20	6	4	34	62	52	63	21	59	91	98	54	40
Endogenous	CD4	NM_000616.4	85	35	142	113	79	46	91	252	38	134	6	107	64	96	49	31	154	58	123	124	109	67	92	484	553	418	272	428	593	598	690	488	697
Endogenous	CD44	NM_001001392.1	706	319	1105	607	967	260	684	1346	163	1458	43	613	1650	2284	1160	2041	3617	2091	1905	1783	2025	1040	1107	6132	5753	5788	4738	4826	11150	3446	5303	3958	8447
Endogenous	CD6	NM_001254751.1	53	57	66	45	18	29	78	71	34	28	5	24	24	13	14	7	44	7	8	14	28	20	9	28	81	58	90	26	80	67	116	134	31
Endogenous	CD68	NM_001251.2	253	122	241	297	419	194	234	521	63	591	10	112	427	1402	477	474	1066	446	708	553	633	473	578	4846	4116	4026	1965	4418	7642	1427	4180	2753	4321
Endogenous	CD84	NM_001184879.1	90	59	100	112	74	39	114	138	34	123	1	43	34	75	23	22	56	27	114	69	42	45	64	508	374	295	259	326	377	254	305	375	336
Endogenous	CD86	NM_175862.3	54	57	94	91	46	42	116	127	66	85	3	66	29	38	6	3	32	15	14	29	22	14	40	148	159	59	99	129	137	92	179	147	398
Endogenous	CD8A	NM_001768.5	114	72	124	85	36	41	198	139	73	46	7	34	50	135	53	88	144	104	20	18	86	34	13	71	168	195	175	76	336	279	257	181	117
Endogenous	CD8B	NM_172099.2	55	48	100	56	11	21	90	119	49	47	2	25	8	18	4	12	19	16	8	2	7	10	6	19	28	32	29	29	45	43	27	40	22
Endogenous	CDH2	NM_001792.3	12	2	89	87	111	208	98	129	67	102	8	183	9	9	1	1	6	1	8	12	6	2	801	3	19	10	13	27	14	13	37	14	47
Endogenous	CDH5	NM_001795.3	89	91	115	90	17	41	176	469	74	65	5	49	325	210	196	59	272	285	246	298	285	184	186	460	1247	245	836	1650	1159	2264	2353	2497	2510
Endogenous	CDK4	NM_000075.2	32	34	135	93	113	55	84	215	22	218	7	126	83	83	38	43	59	49	105	90	61	52	198	235	379	135	175	480	235	282	398	480	534
Endogenous	CDKN1A	NM_000389.2	215	180	573	389	571	421	406	627	210	932	52	695	947	498	487	244	1094	1742	594	861	325	341	1065	695	808	1052	3137	1444	2295	2953	1747	3019	7453
Endogenous	CDKN2C	NM_001262.2	13	13	29	22	29	14	20	95	12	71	1	43	11	40	12	4	25	23	155	118	45	34	164	111	192	190	134	176	158	190	214	130	140
Endogenous	CDON	NM_016952.4	41	51	107	99	33	25	120	130	41	81	5	82	13	13	8	3	4	29	22	17	13	16	77	21	81	22	54	69	47	50	97	99	339
Endogenous	CEACAM3	NM_001815.3	20	32	25	30	2	27	45	42	14	7	3	12	12	8	4	15	17	9	5	5	23	2	2	96	27	26	15	10	39	9	28	28	21
Endogenous	CEBPA	NM_004364.2	61	44	62	79	34	42	80	143	56	81	3	39	40	120	53	22	74	94	57	164	72	79	45	392	753	188	314	846	668	482	1249	877	999
Endogenous	CETP	NM_000078.2	3	1	6	6	1	1	6	13	1	6	1	4	6	15	9	1	22	5	15	34	10	4	9	26	78	8	27	31	20	85	27	42	153
Endogenous	CFH	NM_001014975.2	236	222	618	506	481	257	558	2298	155	1166	32	562	273	242	135	29	161	200	464	395	222	253	2340	631	1677	371	1140	1507	593	2141	1711	1444	3509
Endogenous	CFHR1	NM_002113.2	1	2	6	3	3	1	4	8	1	6	1	2	6	2	1	1	4	1	1	4	4	1	7	11	14	8	9	14	19	10	10	9	17
Endogenous	CFHR4	NM_001201550.2	61	49	79	90	6	28	101	115	41	97	1	65	2	1	1	1	1	2	1	1	1	1	5	13	7	7	5	5	6	8	11	1	1
Endogenous	CFHR5	NM_030787.3	60	60	116	78	23	24	104	123	55	83	6	53	1	1	1	1	1	2	1	1	1	1	3	4	8	2	5	7	5	5	7	13	8
Endogenous	CFI	NM_000204.3	50	51	163	135	195	73	123	273	27	337	16	126	59	102	45	7	72	63	120	176	103	70	89	354	634	247	195	628	251	613	586	514	1004
Endogenous	CFLAR	NM_001127183.1	135	105	335	238	242	156	314	625	92	643	21	199	372	402	261	193	402	785	276	419	375	389	1018	935	2408	517	1717	2189	1709	2476	3221	4357	3755
Endogenous	CFTR	NM_000492.3	88	96	271	83	144	47	189	188	72	192	7	65	91	171	42	105	119	141	48	69	81	174	9	335	585	243	351	351	981	193	343	436	516
Endogenous	CHI3L1	NM_001276.2	293	72	95	241	144	88	117	254	50	51	11	48	156	103	41	31	48	80	52	212	133	84	13	2353	774	201	185	420	380	261	110	722	720
Endogenous	CHMP4B	NM_176812.4	61	47	172	136	182	88	160	261	49	264	14	164	116	91	86	48	123	171	98	122	93	114	508	375	654	232	432	677	734	599	974	1098	1333
Endogenous	CHUK	NM_001278.3	100	112	222	127	99	81	164	280	93	232	11	135	155	156	80	140	142	106	176	146	159	124	251	518	655	399	390	553	712	618	905	792	839
Endogenous	CIITA	NM_000246.3	49	26	48	77	44	31	50	68	17	54	2	26	59	94	48	40	177	36	32	57	65	38	31	150	245	248	204	118	360	105	198	170	234
Endogenous	CKAP4	NM_006825.3	155	83	678	330	511	257	324	732	141	752	41	701	182	180	147	117	185	206	478	189	153	117	388	667	925	814	349	1121	957	624	856	931	1755
Endogenous	COL10A1	NM_000493.3	94	83	1046	808	550	434	459	490	190	670	118	1125	6	1	2	1	2	4	3	18	4	3	5	3	15	13	34	6	5	5	9	11	13
Endogenous	COL14A1	NM_021110.1	169	118	391	506	286	149	469	1147	181	672	56	857	42	165	30	4	83	69	158	214	117	44	2805	80	488	234	381	198	256	608	281	213	1165
Endogenous	COL16A1	NM_001856.3	162	114	428	114	238	140	200	917	129	543	51	723	49	85	48	21	46	51	238	123	61	30	284	116	218	181	214	225	172	247	217	141	294
Endogenous	COL1A1	NM_000088.3	16924	4344	69939	19422	53409	28794	18248	75543	17638	68391	5248	99261	288	310	480	161	295	176	6681	3478	670	86	1539	765	820	7334	1433	1623	1491	536	651	483	6994
Endogenous	COL1A2	NM_000089.3	4654	1446	20617	7554	15971	7775	5447	27008	4186	24615	1429	25121	337	775	549	75	400	202	4486	2895	933	159	1767	1676	3376	4386	1508	4224	2388	2531	1618	646	5170
Endogenous	COL3A1	NM_000090.3	9094	2984	43249	13621	37450	13286	12101	80776	6290	65658	3165	53418	399	1068	1020	64	610	266	17370	7564	1571	164	3542	5860	6844	15373	3372	9234	4787	2793	2946	1087	27629
Endogenous	COL4A1	NM_001845.4	530	287	4474	763	2436	1131	899	3859	515	3215	217	3729	2519	1177	1211	1077	1367	1096	2057	2501	1147	483	3215	2023	4598	1992	3403	8181	4793	5582	3964	3730	12293
Endogenous	COL4A2	NM_001846.2	299	138	1959	353	825	453	524	1793	394	1387	62	1420	822	539	581	628	831	525	1032	1262	811	284	1723	1191	2183	2135	1769	3885	3328	3253	2846	2387	5023
Endogenous	COL5A1	NM_000093.3	993	348	7147	2931	6108	2747	2320	8430	1035	11269	444	9101	259	251	250	47	216	130	2555	1052	233	127	939	807	1251	1376	688	2168	797	1105	1126	795	5255
Endogenous	COL5A3	NM_015719.3	164	110	499	84	576	82	190	499	88	1000	22	399	104	50	110	34	63	178	237	228	64	92	217	137	366	311	504	972	637	506	629	464	501
Endogenous	COL6A3	NM_004369.3	1473	698	7861	2874	6547	1795	3303	13648	1353	12558	614	10539	819	1233	779	270	1270	452	4872	2655	1295	299	1249	4033	3966	6166	1605	5775	3589	3960	3510	1808	11995
Endogenous	COL6A5	NR_022012.2	78	58	124	99	27	47	148	127	66	80	2	61	45	85	12	3	31	9	25	37	37	15	3	74	106	31	51	252	45	462	186	110	146
Endogenous	COL7A1	NM_000094.2	386	376	2288	513	1893	494	831	846	394	2978	186	1618	22	14	17	4	20	26	233	48	25	29	91	44	116	88	121	66	106	183	101	92	162
Endogenous	COX4I2	NM_032609.2	11	10	9	6	2	4	8	102	1	13	1	5	59	72	57	19	67	54	70	93	70	60	46	89	361	78	158	530	174	523	499	327	394
Endogenous	COX6A1	NM_004373.2	211	195	733	521	647	261	479	1029	132	1300	42	602	496	599	267	130	407	407	758	579	394	506	1174	1625	3135	849	1158	4152	1867	3077	3788	3838	4672
Endogenous	COX6B1	NM_001863.4	181	101	670	318	667	253	346	840	107	1141	34	532	526	679	364	220	593	344	866	711	495	559	3017	1956	2544	1353	1375	3099	2389	2532	3041	2813	3474
Endogenous	COX7B	NM_001866.2	119	111	296	251	301	127	245	525	78	503	20	263	161	172	88	27	149	164	253	166	107	179	1919	795	1315	285	414	1783	670	1201	1585	1905	2743
Endogenous	COX7C	NM_001867.2	239	205	443	230	341	204	379	561	142	545	38	318	416	506	196	184	435	343	639	526	427	419	1843	1880	2099	958	1100	2199	2150	1486	2028	1691	2257
Endogenous	CPA3	NM_001870.2	56	60	117	105	39	34	107	279	46	108	7	68	41	118	52	10	136	159	116	107	58	169	36	91	421	145	210	770	302	611	597	596	821
Endogenous	CPB2	NM_001872.3	1	1	1	3	1	3	4	20	3	6	2	5	18	9	8	2	5	55	17	22	14	1	2	22	413	23	125	358	109	401	630	400	474
Endogenous	CPN1	NM_001308.2	28	34	30	22	3	7	39	35	22	14	1	6	1	2	1	1	1	1	2	1	1	2	4	4	7	3	2	9	12	6	6	10	10
Endogenous	CPT1A	NM_001876.3	48	69	89	59	42	31	126	190	57	135	8	64	41	93	25	34	70	80	84	74	93	90	232	287	392	221	244	618	439	571	511	537	487
Endogenous	CR1	XM_006711166.2	172	129	237	275	73	56	379	264	103	103	3	131	167	181	118	61	126	167	129	159	196	191	287	878	1019	525	360	516	608	392	1055	1184	958
Endogenous	CREB1	NM_004379.3	113	108	229	133	95	68	195	305	109	194	22	160	163	175	119	121	195	131	220	208	187	137	305	556	711	519	430	683	818	738	974	800	804
Endogenous	CREB3	NM_006368.4	15	15	65	36	49	22	41	71	13	77	3	71	51	36	31	17	52	38	55	59	44	38	132	117	170	107	99	240	178	199	232	207	237
Endogenous	CREBBP	NM_004380.2	132	131	328	156	207	144	270	421	137	374	19	148	266	293	166	194	286	239	244	326	301	200	528	694	1036	644	922	1080	1317	1257	1901	1663	1412
Endogenous	CRK	NM_016823.2	41	44	118	71	90	50	95	224	43	155	8	103	86	80	48	41	71	96	115	95	88	76	169	343	597	196	347	653	479	576	825	803	1021
Endogenous	CRKL	NM_005207.3	124	127	351	216	218	129	237	482	106	343	16	211	207	200	136	185	284	182	254	242	285	188	553	600	839	740	636	999	1241	964	1359	1304	1370
Endogenous	CRP	NM_000567.2	25	38	42	38	6	10	60	48	20	24	1	18	1	1	1	1	3	1	2	3	1	1	3	9	9	5	4	7	7	11	8	8	6
Endogenous	CSF1R	NM_005211.2	40	36	53	35	27	22	53	74	36	35	1	26	28	36	14	15	35	14	26	52	47	17	45	201	171	101	117	118	220	84	92	84	140
Endogenous	CSF3R	NM_000760.3	104	83	160	119	78	71	173	242	73	113	10	85	721	678	509	316	563	727	344	643	569	751	256	3024	3207	1608	1380	3003	3275	1419	4480	4229	3344
Endogenous	CSNK1A1	NM_001892.4	103	97	343	249	443	152	327	567	90	512	17	428	296	193	117	59	187	251	317	359	189	224	939	634	1376	274	816	1954	897	1487	2159	2712	5259
Endogenous	CSNK1D	NM_001893.3	104	116	300	182	272	123	257	434	95	471	14	200	297	221	152	144	346	303	232	293	256	227	455	726	1050	540	846	1245	1262	1100	1747	1639	2091
Endogenous	CSNK1E	NM_152221.2	138	129	480	206	359	171	262	527	117	584	15	308	460	355	297	157	330	352	422	493	306	338	685	520	1203	356	1098	1720	1089	2208	1916	1878	2132
Endogenous	CSNK1G3	NM_001031812.1	46	46	96	79	84	32	98	129	41	113	11	82	40	55	23	10	34	44	58	62	36	44	150	98	232	54	121	321	136	356	298	401	517
Endogenous	CSNK2A1	NM_177559.2	68	63	155	125	116	92	154	204	46	266	9	148	95	67	32	19	63	56	99	65	58	58	307	237	381	102	212	519	319	395	511	604	682
Endogenous	CSNK2B	NM_001320.5	59	53	345	185	386	128	178	458	53	596	15	295	314	309	156	79	261	249	343	316	233	279	866	1016	1649	575	920	1949	1235	1541	2537	2689	3176
Endogenous	CTBP2	NM_001329.2	266	212	446	438	204	123	501	612	184	388	13	296	125	139	48	69	107	87	175	141	149	118	323	314	655	301	510	726	570	704	911	995	857
Endogenous	CTNNB1	NM_001098210.1	315	258	1273	941	1502	638	846	1671	237	2669	103	1257	702	691	486	209	612	759	816	820	549	621	1818	1648	3741	950	2097	3610	3192	4006	4892	5568	9585
Endogenous	CTNND1	NM_001331.2	268	294	1051	453	631	322	637	969	279	1430	61	611	734	816	537	459	914	668	897	853	955	812	1005	1654	3307	1754	2390	3455	3761	4375	4999	4294	4266
Endogenous	CTSB	NM_147780.2	637	251	1597	1256	3363	564	826	2064	147	3691	67	963	952	1787	713	351	1302	798	2221	1188	1131	937	2986	20845	11983	7378	5274	11445	10919	5405	9175	7185	20389
Endogenous	CTSD	NM_001909.3	1961	969	3099	2125	4870	1790	1791	5249	730	6345	152	1821	2137	7283	3778	4098	7154	2866	4812	4562	4062	3542	4728	30973	29359	37365	11578	22875	46337	8769	20752	14266	20501
Endogenous	CTSL	NM_001912.4	29	14	67	113	324	43	40	205	14	275	4	74	155	147	63	40	122	80	293	115	70	96	377	1811	1389	672	431	2257	907	548	824	775	2880
Endogenous	CTSW	NM_001335.3	79	54	70	53	18	39	95	101	34	34	2	23	71	115	19	27	83	29	18	31	67	19	11	69	147	70	96	99	98	199	225	279	163
Endogenous	CUL1	NM_003592.2	87	82	222	172	136	91	161	314	63	284	12	136	141	145	65	53	135	119	139	154	107	123	470	366	667	210	483	744	598	739	978	1050	1196
Endogenous	CUL3	NM_003590.2	24	19	80	78	102	41	56	122	21	210	7	91	130	87	60	22	55	70	108	106	69	71	332	219	543	84	232	611	242	506	593	823	952
Endogenous	CXCL10	NM_001565.2	47	48	87	116	26	40	111	81	47	119	1	32	23	24	7	4	189	17	22	11	12	1	37	71	108	13	27	100	65	99	34	613	158
Endogenous	CXCL11	NM_005409.4	76	69	91	117	13	44	133	129	39	106	7	39	11	16	6	1	75	4	23	11	7	4	24	32	114	7	24	43	22	53	38	225	42
Endogenous	CXCL12	NM_199168.3	101	46	84	132	119	152	79	108	42	54	7	102	64	107	44	20	119	34	249	75	158	23	406	221	229	276	124	177	215	318	90	71	180
Endogenous	CXCL16	NM_001100812.1	89	43	171	110	244	105	112	308	52	258	13	133	294	558	308	255	606	362	158	427	342	223	153	1505	1512	1318	1192	1436	2618	1069	1716	1968	3263
Endogenous	CXCL2	NM_002089.3	222	156	362	284	512	613	360	610	298	569	21	266	2185	4330	2875	455	4347	14709	889	6259	1413	4650	301	4159	11786	1879	4644	3286	13462	8716	3308	17125	14341
Endogenous	CXCL8	NM_000584.2	77	79	209	69	142	88	130	135	68	348	4	92	147	372	593	104	910	4859	227	722	49	467	64	1114	1741	152	513	758	1732	875	785	1603	4083
Endogenous	CXCR1	NM_000634.2	55	69	99	78	12	30	109	113	53	56	4	26	23	23	16	21	15	54	10	12	37	17	46	77	216	93	62	102	140	28	240	426	150
Endogenous	CXCR3	NM_001504.1	18	23	49	33	10	16	74	25	15	10	2	7	2	8	2	7	15	6	4	1	8	4	5	48	24	15	25	12	20	48	49	37	18
Endogenous	CXCR4	NM_003467.2	747	230	272	627	449	489	691	713	180	402	32	256	655	626	614	165	760	986	260	921	588	440	147	3413	2774	1513	2119	1346	2123	4600	2661	3452	3452
Endogenous	CXCR6	NM_006564.1	80	53	108	73	26	34	90	109	59	60	4	35	25	15	12	8	26	24	7	5	28	12	7	51	65	24	71	27	39	113	60	94	75
Endogenous	CYBB	NM_000397.3	208	50	249	320	221	131	223	288	55	247	8	96	445	1352	346	354	1084	249	399	483	809	423	433	2794	2320	1450	983	1672	3791	921	2808	1903	3926
Endogenous	CYCS	NM_018947.4	67	52	87	78	30	13	77	82	46	86	4	39	87	86	95	29	117	132	57	128	37	65	162	71	139	84	215	267	204	581	314	307	212
Endogenous	CYFIP1	NM_014608.2	79	46	287	111	236	77	150	336	60	389	15	186	265	237	140	142	332	191	357	335	324	180	380	1092	1318	1158	817	1216	1454	1136	1579	1242	1351
Endogenous	CYP1A1	NM_000499.3	77	89	138	92	18	44	131	156	63	65	12	48	1	6	1	1	1	7	5	5	2	35	4	13	54	9	7	6	19	8	10	46	18
Endogenous	CYP1A2	NM_000761.3	58	50	68	49	16	26	107	91	46	36	3	24	1	1	1	1	1	1	1	2	1	2	5	8	8	6	5	7	6	7	10	8	9
Endogenous	CYP27A1	NM_000784.3	157	69	134	100	115	66	128	193	55	152	1	63	139	637	266	296	499	87	192	267	217	148	155	1302	1277	1732	568	1132	1803	554	915	891	801
Endogenous	CYP2C19	NM_000769.1	1	2	3	1	1	1	3	3	1	2	1	1	1	1	1	1	1	1	6	1	5	2	2	6	11	5	11	9	7	5	7	10	2
Endogenous	CYP2C8	NM_000770.3	1	1	7	1	2	1	3	9	1	3	3	1	5	4	4	2	5	7	4	1	6	3	4	7	11	5	4	20	13	14	14	21	25
Endogenous	CYP2C9	NM_000771.3	53	63	114	58	12	28	111	90	48	48	4	30	2	1	1	1	3	4	1	4	2	1	5	7	9	8	11	10	17	12	11	9	8
Endogenous	CYP2E1	NM_000773.3	49	45	69	53	22	17	99	85	38	41	2	28	5	4	5	2	1	8	10	4	4	2	7	4	33	3	11	24	23	35	39	37	38
Endogenous	CYP2J2	NM_000775.2	47	52	118	75	29	27	109	124	41	112	4	59	7	7	4	6	6	7	20	17	11	34	523	39	73	13	49	70	36	50	75	58	66
Endogenous	CYP4A11/22	NM_001010969.3	97	91	139	112	24	45	192	189	93	61	6	52	3	4	6	2	7	22	1	3	3	8	7	8	16	6	13	23	27	51	141	101	38
Endogenous	CYP7A1	NM_000780.3	38	47	68	71	16	17	66	81	27	59	1	38	2	3	1	1	2	2	3	5	2	2	8	10	10	6	6	12	13	10	15	6	11
Endogenous	CYP8B1	NM_004391.2	49	54	88	69	10	26	102	107	49	20	5	22	2	2	1	1	1	1	1	1	1	2	1	4	6	3	4	6	6	10	3	6	5
Endogenous	DAPK1	NM_001288729.1	84	58	164	132	116	87	132	206	40	251	13	110	157	227	88	58	185	114	130	253	164	202	67	486	783	428	624	837	1087	794	1380	1210	878
Endogenous	DAXX	NM_001350.3	73	57	133	72	100	47	114	153	38	135	4	77	60	70	35	26	45	36	62	63	60	59	171	180	312	103	191	377	241	343	444	504	471
Endogenous	DDIT3	NM_004083.4	10	12	62	17	49	30	33	108	12	93	6	63	120	52	45	48	63	89	91	211	42	42	245	205	214	148	177	322	240	426	380	449	514
Endogenous	DDR2	NM_006182.2	107	85	375	212	234	95	213	489	83	499	22	382	115	101	55	13	49	95	173	129	73	72	1001	149	528	91	278	685	160	936	705	678	727
Endogenous	DEPDC5	NM_001136029.2	20	12	72	35	55	21	39	84	11	106	6	52	46	70	39	17	43	30	65	67	41	34	148	151	250	95	124	315	167	350	400	396	356
Endogenous	DERL1	NM_001134671.2	64	70	149	102	86	49	168	178	56	165	11	155	109	123	52	45	92	89	101	82	97	59	148	281	443	167	283	424	356	456	603	674	707
Endogenous	DERL2	NM_016041.3	69	69	152	117	89	51	181	219	80	145	6	114	66	58	34	16	31	31	71	62	51	55	129	175	282	77	126	351	175	285	376	474	532
Endogenous	DIAPH1	NM_005219.4	29	26	136	77	131	56	73	214	15	248	6	124	200	194	78	56	159	136	130	153	134	167	300	370	917	182	544	968	586	813	1156	1770	1797
Endogenous	DLL1	NM_005618.3	14	20	41	23	41	17	40	44	12	47	1	11	47	34	25	9	30	49	36	38	32	36	59	92	114	66	128	113	92	215	191	178	266
Endogenous	DLL4	NM_019074.2	74	63	85	71	16	51	106	159	52	54	10	45	257	165	92	46	171	132	99	259	167	114	59	174	546	143	294	653	419	590	519	598	386
Endogenous	DOCK1	NM_001290223.1	58	56	366	132	308	107	180	379	63	499	20	311	200	171	108	62	156	136	248	252	183	195	403	311	683	198	419	929	528	935	1029	1086	1065
Endogenous	DOCK2	NM_004946.2	82	47	100	111	78	40	119	159	35	76	6	55	143	199	80	64	198	100	114	157	138	153	150	656	854	405	454	695	845	630	1105	906	938
Endogenous	DUSP7	NM_001947.2	114	106	215	149	204	97	198	301	62	345	14	182	217	152	130	144	123	151	205	136	97	128	311	290	660	146	297	936	415	846	965	968	1360
Endogenous	DUSP8	NM_004420.2	182	169	212	134	65	94	226	283	119	144	20	95	133	83	93	20	97	156	38	131	72	64	474	66	405	72	282	346	253	461	356	580	878
Endogenous	DYNLL1	NM_003746.2	547	419	1824	962	1064	755	1037	1782	388	1879	77	1815	1023	783	342	352	728	456	1613	924	714	696	2906	2243	4293	1091	1889	3734	2368	4027	3267	3503	5994
Endogenous	E2F4	NM_001950.3	44	34	101	44	67	32	70	93	31	134	3	70	110	66	37	43	83	48	88	63	76	61	163	199	405	99	164	470	262	376	493	541	635
Endogenous	EEF2K	NM_013302.3	82	69	128	91	106	56	131	195	51	174	11	111	73	65	36	13	41	52	102	97	96	54	257	163	314	92	196	429	203	620	663	681	583
Endogenous	EGFR	NM_201282.1	30	54	194	112	151	53	116	282	17	421	7	94	137	148	100	65	103	138	212	205	127	138	371	232	653	157	433	1083	506	1227	1681	2043	1515
Endogenous	EGR1	NM_001964.2	196	147	352	252	307	418	221	240	165	774	24	98	640	511	180	185	1202	1176	890	2004	429	647	1652	491	1122	1142	2011	2263	6504	6190	1470	5483	2185
Endogenous	EHMT1	NM_024757.3	116	106	270	117	176	106	214	304	86	308	9	171	248	169	118	96	190	144	234	236	143	173	295	436	771	310	517	858	724	908	1046	1093	895
Endogenous	ELN	NM_001081754.1	411	222	2344	549	1367	974	1354	2117	778	2417	389	4290	225	165	454	85	176	604	1117	1213	255	212	1880	203	1259	448	1345	3504	1036	3250	3272	3978	2941
Endogenous	ELOVL6	NM_001130721.1	66	67	114	74	51	52	147	136	50	89	8	74	17	23	15	5	15	6	24	20	11	18	22	81	79	22	30	131	36	86	71	122	194
Endogenous	EOMES	NM_005442.2	14	13	19	14	4	7	20	25	8	6	2	10	8	10	1	3	6	3	2	2	7	4	2	19	17	8	7	10	15	16	19	19	12
Endogenous	EP300	NM_001429.2	102	93	303	176	210	115	254	419	98	359	24	214	233	227	125	44	142	170	206	263	158	200	478	481	1041	181	609	1323	483	1086	1335	1815	1541
Endogenous	EP400	NM_015409.3	102	89	145	88	61	62	151	172	53	123	5	92	150	137	87	78	125	61	160	120	125	99	146	254	273	201	209	296	402	328	365	307	259
Endogenous	EPAS1	NM_001430.3	106	102	243	181	242	111	210	943	71	395	11	201	756	924	854	335	590	2252	829	807	880	1501	1399	1216	8627	696	3459	7934	2304	18918	13184	12664	7254
Endogenous	EPHX2	NM_001979.5	39	48	77	54	26	22	100	108	37	75	2	28	8	23	4	3	4	9	27	26	11	21	142	61	99	33	64	92	91	140	136	89	130
Endogenous	ERC1	NM_178040.1	103	83	281	162	156	121	212	329	75	272	15	197	129	168	80	47	89	115	168	169	114	107	622	314	534	216	348	686	464	730	701	754	655
Endogenous	ERN1	NM_001433.2	102	77	156	110	96	79	151	201	72	152	7	93	180	92	88	43	151	194	68	122	100	110	92	287	530	169	500	479	473	433	603	917	1024
Endogenous	ERO1A	NM_014584.1	122	83	401	258	327	139	223	505	94	537	24	300	299	322	216	177	324	266	482	311	225	267	552	1349	1161	814	862	1489	1216	1071	1395	1572	3126
Endogenous	ERP29	NM_001034025.1	218	178	554	330	471	296	412	885	148	829	38	425	442	925	344	268	485	393	932	848	751	532	748	2459	3212	1725	1664	3767	3201	2266	3351	2675	2890
Endogenous	F11R	NM_144503.1	114	107	385	216	283	164	255	549	110	711	23	209	362	259	145	123	229	410	240	312	219	278	113	853	1626	426	1067	1724	1283	1290	2431	2744	2839
Endogenous	F5	NM_000130.2	38	24	32	52	23	11	52	80	23	27	6	33	14	11	5	4	5	13	4	6	9	5	30	14	74	9	21	57	29	25	64	90	244
Endogenous	F8	NM_019863.2	14	18	61	35	24	17	64	65	10	44	2	32	19	10	5	5	9	10	42	28	9	16	88	100	100	22	345	109	199	138	113	223	831
Endogenous	FABP4	NM_001442.2	58	94	89	70	34	57	127	429	51	67	4	80	224	798	337	531	272	584	139	657	183	716	1894	463	1172	762	1202	13519	5846	1665	3273	1170	2740
Endogenous	FABP5	NM_001444.1	426	450	859	426	455	214	706	911	281	786	41	390	441	1189	736	530	1011	1026	987	1564	597	1452	686	3399	3744	3379	1738	8801	6863	3099	6661	5348	7090
Endogenous	FADD	NM_003824.2	53	57	109	56	38	31	102	106	49	100	3	55	31	31	20	32	20	18	54	33	45	22	44	165	133	106	79	123	127	99	153	126	99
Endogenous	FAM30A	NR_026800.2	76	71	112	71	15	27	145	112	58	59	5	32	8	3	2	3	7	5	3	4	8	8	7	16	16	17	16	15	23	22	47	36	22
Endogenous	FAP	NM_004460.2	85	75	442	245	443	115	206	485	61	702	19	478	13	32	15	4	13	7	183	91	20	14	44	97	113	46	82	216	28	63	36	43	339
Endogenous	FAS	NM_000043.4	81	67	152	129	104	79	125	251	56	239	12	146	103	96	62	34	94	105	140	134	92	84	193	263	513	180	359	492	286	439	432	769	1113
Endogenous	FASN	NM_004104.4	84	69	254	160	227	203	133	470	43	414	8	142	406	640	499	232	775	514	498	985	362	774	135	2609	4486	1623	2870	3408	4037	1948	3585	3166	9365
Endogenous	FBP1	NM_000507.3	275	55	122	279	328	180	108	572	39	370	10	158	430	1537	992	409	1108	478	333	797	590	899	45	1114	2030	1352	1107	2485	3213	1668	4517	3612	5336
Endogenous	FCAR	NM_002000.2	42	50	70	62	20	18	83	80	29	39	5	23	72	22	43	17	23	106	13	53	41	35	27	112	176	62	58	177	65	134	203	303	270
Endogenous	FCER1A	NM_002001.2	4	4	29	84	6	9	49	12	4	32	1	34	15	49	20	4	40	32	15	31	15	13	1	7	66	22	44	37	20	46	164	80	42
Endogenous	FCER1G	NM_004106.1	216	54	184	297	426	140	118	306	29	399	11	72	639	1124	539	543	1054	615	646	537	609	498	685	4156	3115	3096	1196	2756	4771	1367	3004	2349	3901
Endogenous	FCGR3A/B	NM_000570.4	197	145	270	326	138	207	220	442	112	219	9	150	238	483	204	104	422	230	293	248	285	361	658	2277	2776	1416	1130	2198	2351	1519	3732	4263	4881
Endogenous	FCRL2	NM_001159488.1	49	52	91	66	18	24	99	89	39	63	2	33	5	6	4	3	7	5	6	5	9	18	6	25	26	23	21	14	28	18	44	41	36
Endogenous	FGA	NM_021871.2	8	7	4	7	7	1	11	35	6	4	2	8	62	28	9	21	81	49	9	9	26	23	10	26	422	222	319	71	353	172	58	315	210
Endogenous	FGB	NM_005141.3	1	1	6	6	4	1	2	10	1	9	1	5	1	4	3	1	6	4	1	4	2	1	9	6	18	3	4	10	15	9	16	18	9
Endogenous	FGD2	NM_173558.3	151	94	107	134	63	68	119	149	49	85	6	37	196	263	103	290	351	96	161	188	290	219	141	770	715	821	519	874	1331	645	1064	677	837
Endogenous	FGF19	NM_005117.2	53	50	81	45	13	27	94	96	36	34	3	21	1	2	1	2	1	1	1	2	1	1	4	7	9	4	6	8	8	6	9	8	8
Endogenous	FGF2	NM_002006.4	13	15	23	18	15	12	41	42	10	32	4	26	114	45	43	35	60	57	111	57	36	50	364	49	231	42	270	368	112	404	294	528	1234
Endogenous	FGF21	NM_019113.2	119	77	93	64	16	43	110	101	62	44	5	25	4	2	3	4	1	4	2	6	3	3	4	4	9	8	5	10	9	8	8	9	6
Endogenous	FGG	NM_000509.4	54	43	83	61	19	24	101	97	24	42	5	37	87	92	61	7	193	545	16	6	56	109	2	52	1360	1288	949	51	1032	1482	151	3047	686
Endogenous	FGL2	NM_006682.2	96	56	132	129	30	42	103	155	48	102	3	46	130	134	45	19	147	59	54	136	60	73	1048	224	561	144	236	369	278	660	720	595	684
Endogenous	FLI1	NM_001167681.2	70	64	89	86	38	32	117	158	53	64	4	42	145	96	57	21	69	63	76	145	92	112	144	262	586	124	264	892	263	749	1115	1138	1027
Endogenous	FLNB	NM_001164317.1	75	89	222	119	146	146	167	204	82	178	13	184	153	116	91	70	120	101	181	248	129	148	263	377	608	267	454	895	607	801	1016	1127	1037
Endogenous	FLT1	NM_002019.4	81	71	114	96	29	25	135	203	45	104	1	72	214	151	87	34	136	204	100	141	112	133	228	334	531	89	523	986	419	1360	1240	1891	4021
Endogenous	FLT4	NM_002020.1	8	7	10	5	7	11	9	33	4	14	2	14	209	121	78	20	66	57	59	116	118	47	31	109	358	49	163	334	130	447	455	475	358
Endogenous	FN1	NM_212482.1	1417	578	14252	10052	17351	7390	3602	13041	1306	29244	1007	24636	913	2376	1226	149	992	779	4405	3407	795	703	6165	1911	9183	2732	4148	15682	3323	10519	11698	7547	23481
Endogenous	FNIP2	NM_020840.1	69	50	135	103	94	80	128	182	34	142	7	64	115	199	115	75	144	97	108	156	140	118	328	410	640	272	315	704	479	617	858	938	867
Endogenous	FOXP3	NM_014009.3	35	20	72	29	13	24	90	48	26	18	1	11	1	4	4	1	6	2	7	1	2	3	5	20	18	13	17	11	9	12	18	20	25
Endogenous	FPR1	NM_002029.3	39	34	43	31	24	15	48	67	28	26	1	22	79	36	44	34	88	64	41	29	71	28	71	618	227	285	160	276	316	219	346	545	649
Endogenous	FRS2	NM_006654.3	133	92	256	138	152	117	221	316	93	276	14	210	100	98	64	41	78	53	142	145	73	95	314	215	435	118	247	508	293	488	559	593	690
Endogenous	FST	NM_006350.2	81	90	189	155	76	59	180	228	86	145	13	120	66	34	19	20	53	39	34	32	40	25	112	45	121	93	227	220	114	427	420	321	580
Endogenous	FURIN	NM_002569.2	157	111	308	137	300	163	205	383	97	322	32	260	425	330	285	213	318	316	282	277	276	227	311	869	1162	540	813	1335	1254	1121	1253	1272	1580
Endogenous	FZD2	NM_001466.2	61	87	77	64	33	48	105	94	36	61	6	47	8	9	5	2	11	2	23	16	11	5	41	56	48	22	28	54	32	51	70	85	46
Endogenous	FZD5	NM_003468.2	67	59	133	91	50	92	117	205	66	118	4	82	175	185	95	113	135	131	99	197	174	183	69	739	697	401	340	864	859	745	1020	1316	882
Endogenous	GAB1	NM_002039.3	13	21	65	44	66	30	43	109	23	97	4	59	129	141	45	27	67	108	117	184	117	111	447	229	644	169	277	797	450	701	985	1152	822
Endogenous	GAS1	NM_002048.2	102	68	104	106	71	59	98	192	47	72	13	89	63	44	46	11	83	66	94	147	51	43	402	101	166	274	223	155	263	472	633	215	737
Endogenous	GATA3	NM_001002295.1	93	86	106	100	14	53	138	122	52	41	1	46	27	60	16	10	34	12	21	45	25	20	18	41	115	47	70	178	150	201	227	226	96
Endogenous	GBP4	NM_052941.4	76	84	131	150	36	63	150	186	49	114	7	67	124	263	94	28	182	72	104	135	165	105	117	227	1100	70	257	1000	224	1153	1080	1063	352
Endogenous	GBP5	NM_052942.3	122	64	102	144	31	53	97	103	49	74	6	46	45	136	24	18	199	9	19	35	52	32	66	262	284	95	188	106	165	335	237	321	219
Endogenous	GCNT1	NM_001097633.1	60	50	154	101	76	54	120	136	60	155	8	99	11	36	6	9	29	10	45	42	28	29	24	85	105	56	72	116	128	92	184	165	171
Endogenous	GLI1	NM_005269.1	59	44	113	59	51	45	118	127	49	79	7	75	8	11	1	2	5	3	13	6	6	2	18	9	13	10	11	24	18	27	29	21	29
Endogenous	GLI2	NM_005270.4	48	38	94	52	53	57	85	116	37	93	13	95	23	28	12	2	6	8	40	38	14	10	72	16	35	27	21	51	26	69	57	55	88
Endogenous	GLI3	NM_000168.5	66	49	160	98	109	36	118	213	53	171	6	124	42	52	28	5	29	37	80	91	38	41	132	84	217	42	121	328	132	369	294	312	294
Endogenous	GLP1R	NM_002062.3	60	59	73	51	10	21	97	111	40	27	4	29	6	5	1	1	2	1	3	2	8	4	8	5	16	4	6	4	12	20	17	4	13
Endogenous	GNB4	NM_021629.3	21	15	88	65	97	29	57	114	18	119	8	114	70	85	35	14	55	34	84	93	52	50	266	237	477	109	182	542	253	481	493	537	795
Endogenous	GNG2	NM_053064.4	53	59	95	110	52	37	125	189	48	171	7	117	58	55	34	10	46	45	43	64	49	39	83	92	388	58	121	293	135	261	325	331	358
Endogenous	GNLY	NM_012483.2	75	66	84	58	9	29	95	125	46	31	6	19	57	95	62	34	35	16	6	17	55	6	15	33	73	51	35	113	67	138	280	121	114
Endogenous	GNPTAB	NM_024312.3	67	62	170	159	101	50	133	201	50	210	5	133	65	97	48	11	36	34	61	105	62	76	190	253	432	79	206	501	179	507	516	723	624
Endogenous	GOT2	NM_002080.2	81	94	207	129	127	71	180	254	71	261	7	127	81	65	17	22	63	47	116	54	64	76	713	228	327	102	142	417	327	277	420	429	545
Endogenous	GPC4	NM_001448.2	69	45	193	140	146	136	156	211	59	249	10	84	49	98	44	17	71	74	77	95	76	86	199	463	436	210	319	565	466	643	641	785	753
Endogenous	GPR65	NM_003608.2	71	48	71	70	15	15	63	89	35	48	5	35	43	60	17	13	65	29	31	37	31	59	21	212	184	97	93	176	180	147	176	176	183
Endogenous	GPX2	NM_002083.2	61	71	135	52	47	25	110	141	53	141	1	40	7	8	6	12	8	15	46	2	9	16	4	22	33	18	14	34	54	18	15	17	20
Endogenous	GPX3	NM_002084.3	235	200	261	445	267	161	260	1340	140	786	15	306	2848	1784	2229	1362	1721	5349	4649	3779	1429	3658	14026	4307	14264	3390	21782	54241	14142	30781	42822	58934	27745
Endogenous	GRB10	NM_001001555.2	126	145	277	112	129	100	219	337	120	185	14	172	176	104	91	156	127	123	192	145	153	94	308	270	444	370	379	546	566	550	785	677	712
Endogenous	GREM1	NM_013372.5	112	90	378	411	362	124	203	144	60	401	30	348	6	13	5	1	12	3	13	6	9	8	57	97	27	12	13	13	14	15	9	22	158
Endogenous	GSK3B	NM_002093.2	87	96	243	152	169	91	157	267	82	273	14	170	173	133	70	46	98	106	138	158	136	131	344	405	806	216	347	783	467	784	1123	1315	1071
Endogenous	GZMA	NM_006144.2	65	57	164	105	34	38	108	126	40	70	11	54	52	81	22	18	77	9	14	19	83	31	19	134	181	69	137	62	124	215	252	295	95
Endogenous	GZMB	NM_004131.3	99	72	108	129	39	55	150	172	68	101	9	56	78	186	46	36	128	200	23	23	65	38	12	129	203	43	155	148	88	384	307	450	267
Endogenous	GZMH	NM_033423.3	42	38	67	50	19	24	69	75	42	39	4	25	34	54	13	6	14	15	12	16	26	5	23	36	89	9	44	60	34	114	149	96	73
Endogenous	HADH	NM_001184705.2	104	95	249	140	112	61	168	321	74	293	9	130	74	107	24	19	46	48	144	110	57	92	638	295	570	145	264	573	408	508	508	719	1040
Endogenous	HADHA	NM_000182.4	174	148	485	328	405	207	353	746	119	792	25	359	231	395	190	103	337	310	505	383	311	355	1579	1191	1955	1018	1040	2440	1934	1916	2649	2556	3258
Endogenous	HAVCR1	NM_001173393.1	1	1	1	1	2	3	1	5	1	4	1	4	2	4	7	1	1	4	3	1	2	2	1	10	11	8	18	16	14	11	22	14	15
Endogenous	HCAR2	NM_177551.3	102	104	157	110	45	39	167	204	74	159	13	53	38	84	25	14	81	64	30	53	46	40	12	47	145	46	90	73	204	108	180	262	272
Endogenous	HCFC1	NM_005334.2	64	47	249	142	160	105	201	269	43	297	15	192	174	182	77	52	143	99	198	171	164	108	444	430	741	196	371	951	542	759	1020	1078	1035
Endogenous	HCK	NM_002110.2	177	123	235	206	140	94	202	260	100	178	8	102	674	546	258	295	652	309	331	357	422	363	329	1070	1771	721	685	1390	1519	689	1920	1816	2154
Endogenous	HDAC4	NM_006037.3	65	60	137	106	61	46	115	159	52	114	9	80	47	30	9	11	43	30	32	36	22	33	146	103	201	53	92	195	131	223	304	358	298
Endogenous	HDC	NM_002112.3	52	73	85	62	13	29	129	119	45	38	3	28	16	17	7	7	105	30	17	30	40	37	13	42	60	53	25	62	51	162	83	47	195
Endogenous	HIF1A	NM_001530.2	281	272	772	520	974	295	550	988	143	1227	36	592	1037	773	789	211	823	821	901	973	545	573	1063	2323	2940	1255	2796	4332	2088	2787	2701	2912	8864
Endogenous	HIF3A	NM_152796.2	49	69	67	43	29	51	77	152	26	53	5	26	69	86	98	31	91	160	332	283	141	201	910	429	795	340	1024	1749	971	2281	3037	2490	897
Endogenous	HIKESHI	NM_016401.4	177	156	360	245	155	102	345	390	105	288	10	190	84	61	20	18	49	55	106	67	50	72	343	211	418	85	185	460	219	454	508	723	778
Endogenous	HKDC1	NM_025130.3	27	24	63	50	30	27	64	94	24	52	4	37	12	9	9	6	10	6	17	11	12	5	1	50	126	55	58	85	38	66	35	89	70
Endogenous	HLA-A	NM_002116.5	2280	796	2637	2746	2870	1909	1709	2935	303	4900	222	1622	3108	5890	2117	1034	4405	2348	2457	3324	2711	2160	3234	12755	16496	5372	6530	12631	13305	16148	16263	16237	14879
Endogenous	HLA-B	NM_005514.6	1423	660	2011	2235	1998	1900	1509	1860	163	2880	191	909	2271	5620	2131	1558	4686	2364	1905	3336	3085	1763	2604	10176	15530	6095	6530	11440	16200	12303	16134	13854	14939
Endogenous	HLA-DPA1	NM_033554.2	289	108	321	825	490	390	415	706	60	1104	21	406	386	941	290	136	903	381	211	527	507	313	386	1153	3083	1422	1863	3191	2914	3806	5914	6964	8501
Endogenous	HLA-DQA1	NM_002122.3	644	117	884	967	1	624	891	1483	116	892	23	341	2	1190	756	250	2636	511	264	3	1518	429	3	2359	2696	6	2	9	9432	6	11258	11577	7431
Endogenous	HLA-DQA2	NM_020056.4	73	63	90	87	17	39	91	97	27	43	3	33	6	3	1	4	6	3	2	2	4	2	4	8	17	11	8	42	7	12	18	18	14
Endogenous	HLA-DRA	NM_019111.3	1029	270	993	2434	2089	1131	904	2816	124	3693	50	1065	1393	3597	1362	604	3674	1708	931	2431	1616	1658	1264	7084	11614	7129	6096	11114	10991	12860	21095	21229	27427
Endogenous	HLA-E	NM_005516.4	433	293	673	676	636	426	606	1222	104	1015	38	345	1911	2396	1306	824	2123	1973	1105	2024	1820	1807	2136	4605	9419	2989	5437	10211	6179	13223	15584	14233	8596
Endogenous	HLA-F	NM_001098479.1	134	54	129	142	96	89	119	158	27	191	8	44	190	259	94	50	245	96	70	194	158	130	233	470	1074	250	373	688	494	840	938	856	757
Endogenous	HLA-G	NM_002127.4	27	32	67	151	128	51	73	213	13	132	9	84	98	137	51	22	126	38	94	122	76	96	103	707	841	259	433	825	766	999	1777	1253	1910
Endogenous	HMGCS2	NM_005518.3	48	55	67	50	13	28	91	91	43	41	2	24	7	15	4	1	1	7	4	4	7	50	13	15	22	17	15	30	76	27	19	15	13
Endogenous	HMOX1	NM_002133.2	113	97	122	79	118	75	116	214	48	164	5	61	517	378	270	511	387	478	1644	1084	320	679	225	19252	3308	1384	1000	3492	6876	638	1200	716	2963
Endogenous	HSBP1	NM_001537.2	104	96	338	149	206	121	220	384	91	394	21	227	170	164	74	77	153	102	195	182	258	140	223	423	800	387	384	748	796	674	903	769	979
Endogenous	HSD11B1	NM_181755.1	39	3	15	46	10	12	10	42	4	12	1	11	53	47	19	15	57	45	69	41	30	15	41	181	133	75	113	290	81	373	190	327	272
Endogenous	HSD17B4	NM_000414.2	100	47	190	199	242	96	152	601	76	385	14	152	180	507	220	143	378	242	384	464	371	402	674	2644	2515	2053	909	2638	2216	1904	3040	2486	2875
Endogenous	HSP90AA1	NM_001017963.2	296	261	1189	878	756	474	828	1526	236	1836	46	936	991	860	324	353	958	1061	1193	1192	677	681	3197	2480	4343	1129	2095	3670	2976	4289	4795	5175	20002
Endogenous	HSP90AB1	NM_007355.3	506	446	1851	1155	1360	733	1326	2684	353	3383	93	1382	1891	1502	823	1214	2808	2109	2188	2042	1566	1186	6324	4421	5740	4303	3868	7225	8254	7251	8664	9429	21889
Endogenous	HSPG2	NM_005529.5	547	367	2433	1348	1706	1147	1350	2293	818	2593	183	2568	748	584	536	297	643	617	1523	1762	773	571	3941	1763	2989	1855	1734	4580	3183	3591	4455	4317	6073
Endogenous	HTRA2	NM_013247.4	53	57	68	61	35	27	81	121	37	51	9	44	33	54	32	43	57	41	66	53	74	37	84	161	154	173	112	182	255	186	207	184	136
Endogenous	HVCN1	NM_032369.3	41	51	52	38	20	23	63	61	18	33	2	10	18	65	19	26	86	27	45	45	34	26	55	139	131	243	80	86	262	91	151	109	81
Endogenous	ICAM1	NM_000201.2	114	107	369	344	263	297	379	741	190	847	43	510	1405	1222	903	327	966	3879	454	1626	367	588	190	1033	4749	447	2857	2572	3611	2520	2091	6383	6553
Endogenous	ICOS	NM_012092.2	61	57	98	64	14	34	105	106	34	49	5	44	4	17	5	3	15	13	2	10	2	5	6	26	31	17	35	26	46	47	41	62	58
Endogenous	IFI27	NM_005532.3	364	308	891	875	1091	784	761	1362	211	1525	89	945	2297	2088	639	304	858	1189	1109	1325	1650	625	2488	1898	5685	1398	3026	5985	3837	11497	9297	10176	4446
Endogenous	IFI35	NM_005533.3	18	12	41	28	26	23	32	68	12	65	1	30	72	91	33	23	78	28	52	60	60	46	160	119	263	122	89	262	183	264	290	230	178
Endogenous	IFI6	NM_002038.3	54	50	152	136	273	86	96	255	52	265	8	156	361	874	156	106	176	185	188	311	224	111	2703	875	740	594	557	1914	1244	1155	1151	1418	901
Endogenous	IFNG	NM_000619.2	38	43	72	62	15	14	74	96	33	45	1	38	2	2	1	4	1	12	2	5	2	3	5	5	11	6	6	9	4	42	15	15	26
Endogenous	IFNGR1	NM_000416.2	200	128	581	484	482	197	333	1030	103	1120	19	287	698	736	503	248	657	704	665	738	768	655	918	3051	3832	1550	2291	4758	2979	6498	9507	9806	7107
Endogenous	IGF1	NM_000618.3	173	79	186	143	88	68	160	373	99	176	34	323	136	79	42	12	59	11	262	113	70	25	327	282	141	282	139	165	226	114	192	85	648
Endogenous	IGF1R	NM_000875.4	24	26	147	41	135	53	75	114	24	205	11	88	76	79	63	55	64	87	88	108	98	100	220	184	343	171	282	375	374	434	562	524	364
Endogenous	IHH	NM_002181.2	22	24	23	19	11	12	41	45	12	15	2	15	5	1	2	2	2	4	4	5	1	2	1	16	19	12	6	21	25	34	21	32	21
Endogenous	IKBKB	NM_001556.1	52	72	141	52	70	49	92	148	48	185	3	75	111	119	60	75	116	81	151	110	131	120	165	268	442	267	339	402	400	457	543	491	415
Endogenous	IL10	NM_000572.2	1	4	11	6	10	2	8	8	3	7	1	3	17	23	10	5	24	40	36	44	2	7	38	147	39	149	39	105	130	97	71	55	296
Endogenous	IL10RA	NM_001558.2	105	90	100	109	79	50	131	158	50	64	3	40	132	94	65	32	141	73	74	131	99	97	136	614	635	268	384	571	509	636	669	686	965
Endogenous	IL11	NM_000641.2	41	44	56	45	46	29	73	72	36	42	7	43	13	1	5	2	3	4	6	2	1	4	4	3	9	8	13	19	5	6	5	14	149
Endogenous	IL12RB2	NM_001559.2	24	17	38	51	5	12	54	49	17	18	1	22	2	5	3	1	8	3	2	2	3	2	13	14	17	4	15	12	9	15	12	14	29
Endogenous	IL13	NM_002188.2	33	44	64	47	18	22	64	73	25	35	6	19	5	3	2	2	3	5	2	7	1	1	5	6	12	1	11	19	11	12	21	22	26
Endogenous	IL17A	NM_002190.2	1	1	1	1	2	4	1	1	2	2	1	1	1	1	2	1	3	1	2	6	3	1	3	4	10	9	5	8	14	8	2	8	26
Endogenous	IL18R1	NM_003855.3	41	49	42	40	29	22	69	98	36	60	3	25	109	90	70	99	112	253	65	52	115	207	26	445	558	237	420	736	438	1204	1252	1416	810
Endogenous	IL1B	NM_000576.2	55	63	99	72	20	31	116	122	44	41	6	41	91	51	26	29	130	183	16	77	30	62	44	96	113	35	64	235	197	146	206	317	562
Endogenous	IL1R1	NM_001320984.1	61	45	153	130	233	64	134	257	48	383	6	146	206	163	93	57	127	170	288	146	101	129	196	386	593	243	498	939	438	750	685	815	1803
Endogenous	IL1RAP	NM_002182.2	83	88	187	120	97	51	176	248	79	177	6	91	305	192	146	132	291	241	153	120	147	94	172	291	433	265	552	462	718	420	748	806	1551
Endogenous	IL20RB	NM_144717.2	50	40	85	66	21	17	66	109	35	57	6	42	4	5	3	1	5	3	6	5	3	1	10	11	21	11	13	19	18	25	28	25	22
Endogenous	IL21R	NM_021798.2	45	37	72	60	14	29	75	64	26	24	4	22	7	7	4	4	26	15	9	4	6	8	7	42	59	14	35	34	40	77	56	38	47
Endogenous	IL27	NM_145659.3	73	82	73	61	11	31	91	86	55	36	3	25	4	17	2	4	13	9	4	1	4	7	3	20	17	7	9	19	15	12	11	20	17
Endogenous	IL2RA	NM_000417.1	54	44	64	52	25	24	58	83	37	38	6	22	11	12	4	1	15	13	10	5	9	5	11	82	83	45	57	28	36	37	98	47	82
Endogenous	IL2RB	NM_000878.2	49	31	53	43	21	19	67	60	37	26	2	8	38	46	19	11	59	30	13	26	38	23	13	82	117	53	82	58	71	145	141	206	83
Endogenous	IL33	NM_033439.2	69	66	137	105	33	37	117	158	56	155	3	67	68	58	25	6	52	24	189	84	129	53	381	195	861	81	218	374	162	654	532	207	1096
Endogenous	IL4	NM_000589.2	40	49	50	33	16	21	62	54	31	29	3	16	1	1	2	1	1	5	4	2	1	1	7	3	6	5	3	7	7	12	12	5	6
Endogenous	IL6	NM_000600.3	17	24	22	19	16	6	23	32	15	21	1	17	679	479	643	134	2325	4146	74	321	111	153	113	138	322	412	1436	189	1941	2446	314	705	6551
Endogenous	IL6ST	NM_002184.2	164	150	339	337	294	189	360	828	113	666	11	402	1037	654	391	131	449	526	972	770	509	452	1708	1109	3137	459	1737	5046	1314	4968	4406	6556	6434
Endogenous	ILK	NM_004517.2	35	27	301	147	226	66	110	192	25	303	12	327	162	175	51	25	100	72	192	189	129	119	733	342	756	171	332	1185	490	1026	914	1027	1087
Endogenous	INPP5D	NM_005541.3	126	94	198	188	120	53	178	198	48	239	10	62	85	79	32	24	50	47	67	88	51	86	75	262	455	107	257	328	238	427	553	561	458
Endogenous	INSR	NM_000208.2	143	160	363	176	192	97	277	417	103	413	18	106	227	164	101	56	114	232	241	264	159	265	1032	410	708	305	862	1082	728	1190	1686	1808	1811
Endogenous	IQGAP1	NM_003870.3	138	104	405	392	483	250	315	884	104	883	21	475	470	464	211	83	374	295	514	517	350	390	1181	1197	2671	427	1200	3237	1387	2221	2872	4205	5014
Endogenous	IRAK3	NM_007199.1	128	99	150	135	108	55	162	244	72	141	8	68	267	183	172	159	217	270	188	165	171	175	107	857	672	412	511	680	808	805	1238	1104	1050
Endogenous	IRF1	NM_002198.2	47	30	40	29	24	29	41	31	12	40	3	19	98	123	150	69	492	320	51	303	98	72	60	276	356	219	403	281	868	398	380	523	385
Endogenous	IRF3	NM_001571.5	42	31	72	22	69	32	47	56	17	88	6	59	84	94	47	65	115	69	112	92	92	64	112	264	260	266	254	225	364	264	265	257	187
Endogenous	IRF4	NM_002460.1	126	97	115	74	22	35	152	135	67	49	8	31	53	51	58	13	119	192	32	38	25	65	14	129	54	107	113	75	138	205	174	179	234
Endogenous	IRF8	NM_002163.2	74	38	50	81	31	29	89	76	33	76	3	32	54	129	86	49	153	66	49	110	46	98	38	288	333	256	230	335	491	355	432	437	785
Endogenous	IRS1	NM_005544.2	67	64	174	101	112	56	142	228	67	202	9	157	17	20	13	5	10	16	29	29	16	16	47	40	115	18	64	99	77	190	196	254	198
Endogenous	ISG15	NM_005101.3	58	90	146	137	178	83	122	185	63	214	5	198	285	333	128	42	115	72	114	187	176	104	2041	424	598	145	282	1088	422	589	586	747	432
Endogenous	ISG20	NM_002201.5	105	114	112	99	77	61	166	183	47	141	10	46	455	195	103	222	258	267	87	135	95	181	108	359	494	244	540	609	588	624	738	1298	818
Endogenous	ITCH	NM_001257138.1	86	80	243	158	206	101	186	351	70	400	20	157	184	175	94	37	130	168	177	155	110	140	524	432	887	171	506	964	510	948	1090	1516	1631
Endogenous	ITGA1	NM_181501.1	68	56	586	115	394	101	199	692	117	656	34	283	427	316	207	72	230	186	364	613	333	308	884	362	2988	267	919	2952	727	3058	3011	2864	2207
Endogenous	ITGA4	NM_000885.4	65	50	109	97	51	56	93	149	24	74	3	45	104	108	43	18	100	30	53	72	101	46	54	194	410	103	211	219	219	465	296	255	303
Endogenous	ITGA5	NM_002205.2	176	106	749	207	944	231	235	666	93	1048	30	637	609	299	326	320	399	338	545	429	263	231	1159	707	1134	435	1041	2106	1053	2167	1959	2379	3326
Endogenous	ITGA9	NM_002207.2	98	73	265	115	75	112	198	336	94	229	27	258	86	107	49	17	49	64	99	140	99	82	392	185	361	162	238	418	264	436	504	454	495
Endogenous	ITGB1	NM_002211.3	356	211	3278	1450	2583	989	1179	3477	444	4581	170	3243	1097	864	611	266	881	895	1627	1673	983	793	5186	2670	6507	2048	3587	8860	4474	7494	8360	10244	12780
Endogenous	ITGB3	NM_000212.2	37	30	80	38	85	36	73	72	33	76	6	45	46	15	21	28	18	17	25	30	17	25	206	25	85	21	100	144	112	163	108	62	150
Endogenous	ITPR2	NM_002223.2	68	25	121	122	117	68	111	222	24	189	7	85	187	215	85	64	174	131	154	171	180	157	307	715	800	374	598	867	674	783	1085	1124	1180
Endogenous	JAG1	NM_000214.2	30	37	251	89	207	25	113	266	18	429	6	123	239	129	64	27	78	101	130	167	131	166	884	161	700	98	388	1273	273	958	1554	987	1177
Endogenous	JAG2	NM_145159.1	51	84	204	112	70	40	145	227	43	234	9	73	42	69	37	16	70	54	114	75	83	79	169	144	449	122	201	263	270	357	321	254	467
Endogenous	JAK1	NM_002227.1	92	68	203	136	198	110	197	392	46	403	17	184	261	269	218	109	232	329	306	429	242	189	504	724	1226	443	807	1636	941	1570	1552	2364	2255
Endogenous	JAK2	NM_004972.3	41	46	111	95	54	35	85	210	41	106	5	60	74	107	36	23	81	55	102	126	76	86	471	168	543	103	322	620	279	734	903	985	721
Endogenous	JMJD4	NM_001161465.1	90	72	151	86	61	55	142	197	54	121	13	72	60	64	22	34	46	27	71	46	54	38	99	109	169	79	96	248	148	180	212	219	262
Endogenous	JUN	NM_002228.3	114	82	146	192	138	133	145	297	63	479	10	125	180	373	226	67	529	684	580	1353	249	523	1916	596	1144	411	1567	4284	2651	8913	4851	5977	2835
Endogenous	KANSL1	NM_001193465.1	16	10	70	35	71	26	40	86	3	138	5	76	46	69	30	13	42	53	52	94	52	51	195	151	332	74	153	417	192	461	526	669	511
Endogenous	KAT6A	NM_001099412.1	109	93	285	171	148	84	220	369	70	268	16	160	285	244	193	126	202	268	220	240	276	284	423	574	1169	325	796	1125	819	1760	1865	1992	1696
Endogenous	KDM2A	NM_012308.1	71	78	174	114	174	94	162	289	73	290	14	181	235	206	111	51	144	174	172	238	159	174	291	405	742	196	440	852	562	768	1003	1134	1260
Endogenous	KDM3B	NM_016604.3	54	66	160	106	93	56	125	204	49	256	13	90	102	81	50	14	60	62	86	125	70	111	324	236	481	98	252	638	296	678	814	921	748
Endogenous	KDM5D	NM_001146705.1	68	72	3	116	2	3	1	310	50	257	9	85	164	159	65	18	74	2	1	170	94	146	5	282	632	133	328	665	321	803	732	7	7
Endogenous	KDR	NM_002253.2	69	54	169	97	58	83	136	145	62	190	11	102	200	129	107	18	74	109	121	206	95	112	249	175	607	95	477	1506	481	1484	1699	2034	1321
Endogenous	KIF3A	NM_007054.5	53	61	140	112	77	36	113	152	48	143	12	83	17	21	10	4	16	10	32	26	18	32	107	54	165	24	74	156	65	140	195	235	328
Endogenous	KIR2DL3	NM_015868.2	195	238	486	344	42	75	464	746	191	117	16	104	2	13	4	3	5	6	4	8	6	6	2	20	25	10	11	25	15	27	60	69	44
Endogenous	KIR3DL1/2	NM_001322168.1	60	64	88	69	18	35	122	130	67	55	2	29	1	2	2	5	5	1	2	5	3	3	2	16	14	5	29	26	15	30	17	34	12
Endogenous	KLF5	NM_001730.3	50	111	265	161	185	132	169	339	57	603	10	144	241	155	89	84	209	247	166	260	171	286	68	417	860	285	992	1039	941	856	1315	1359	1265
Endogenous	KLKB1	NM_000892.3	67	65	87	92	27	31	98	95	52	95	6	45	4	8	1	5	4	2	11	6	9	3	19	8	28	9	29	32	25	76	34	49	40
Endogenous	KLRB1	NM_002258.2	27	8	2	29	19	18	16	23	1	9	2	8	27	52	22	16	45	24	16	28	63	32	12	92	153	82	228	86	214	238	248	315	278
Endogenous	KLRD1	NM_007334.2	54	83	89	82	23	34	102	136	55	45	15	54	13	26	10	25	10	15	10	12	21	9	4	15	49	24	27	26	49	50	76	74	22
Endogenous	KLRK1	NM_007360.3	1	9	10	9	15	8	14	22	1	7	1	5	16	61	22	25	24	36	12	15	42	26	13	56	133	75	70	67	105	212	261	258	109
Endogenous	KMT2D	NM_003482.3	27	23	104	66	89	37	68	139	23	154	5	80	123	116	89	52	90	65	104	134	90	118	292	270	495	158	316	691	411	629	800	867	760
Endogenous	KNG1	NM_000893.2	2	5	3	1	2	4	5	4	2	3	1	1	1	3	1	1	2	4	7	2	1	1	4	13	9	8	9	13	15	7	10	12	14
Endogenous	KRAS	NM_033360.2	40	29	100	72	81	27	79	139	32	182	1	70	60	71	20	24	62	95	75	95	40	63	139	191	418	94	203	378	232	373	390	519	845
Endogenous	LAG3	NM_002286.5	9	3	20	11	15	6	18	17	6	20	1	14	13	25	16	5	24	17	17	17	21	14	31	65	63	43	75	54	76	75	77	71	117
Endogenous	LAMA3	NM_000227.3	57	68	158	114	110	48	122	220	36	311	7	92	106	76	34	11	55	110	58	116	68	97	55	187	500	79	278	661	251	620	736	941	484
Endogenous	LAMC1	NM_002293.3	159	122	685	290	439	258	340	786	178	1059	57	669	401	328	330	87	213	264	1073	592	205	262	1369	655	1667	429	1158	3785	1068	2472	2584	2830	2711
Endogenous	LAMTOR2	NM_001145264.1	63	34	150	74	108	73	89	146	35	188	12	80	91	130	48	47	92	49	159	138	126	95	213	384	462	199	231	626	397	365	514	441	635
Endogenous	LAMTOR4	NM_001008395.2	151	124	409	195	274	155	293	455	112	459	17	293	313	385	184	173	394	205	430	423	374	329	657	1388	1635	1022	952	1647	1908	1315	1977	1629	1645
Endogenous	LATS1	NM_004690.2	110	84	244	132	117	101	160	277	70	224	16	143	148	154	70	67	121	87	155	141	123	85	328	278	565	184	365	649	440	636	735	865	721
Endogenous	LATS2	NM_014572.2	166	143	329	199	185	162	264	444	149	334	31	266	382	238	209	176	380	382	241	457	324	213	647	529	1026	680	1142	1128	1187	1164	1438	1561	1924
Endogenous	LDLRAP1	NM_015627.2	14	21	65	29	73	29	28	82	8	141	4	52	32	45	23	6	24	39	62	54	42	46	149	99	353	35	139	307	116	413	355	510	448
Endogenous	LEP	NM_000230.2	32	27	68	24	7	18	39	54	34	19	1	17	1	3	4	1	5	3	3	3	1	2	5	24	20	5	7	18	9	9	14	16	23
Endogenous	LEPR	NM_001003679.1	71	124	154	114	63	46	180	193	76	130	8	94	106	145	91	25	81	119	142	197	103	150	201	356	488	129	809	1069	448	807	1116	1379	1131
Endogenous	LGALS3	NM_001177388.1	102	81	610	361	742	209	395	1283	64	1447	35	604	729	1021	395	236	665	573	780	663	426	682	1224	1898	2291	1120	2081	5331	3062	2754	5031	5809	8218
Endogenous	LGMN	NM_001008530.2	69	37	362	190	903	106	191	618	38	760	20	304	239	386	188	77	232	249	404	424	342	198	1048	2143	2867	1379	1239	2436	1923	1330	2101	1832	3629
Endogenous	LILRB2	NM_001278405.1	80	65	107	93	66	35	106	131	39	66	6	40	373	195	109	86	153	82	122	129	199	265	144	471	855	204	267	719	483	726	863	579	1358
Endogenous	LIPA	NM_000235.3	72	26	110	182	283	95	81	269	18	412	4	126	124	414	198	43	265	131	224	248	136	230	273	1502	1367	952	527	3147	1437	1107	1585	1843	3710
Endogenous	LIPC	NM_000236.2	47	41	75	47	12	26	78	89	29	27	11	20	3	3	4	1	3	2	3	5	3	3	10	11	11	2	8	12	7	7	5	9	17
Endogenous	LIPG	NM_006033.2	16	15	72	35	25	35	36	41	24	43	2	71	49	11	14	32	34	11	32	9	11	4	5	58	36	44	92	41	57	23	10	28	178
Endogenous	LOX	NM_002317.4	52	25	281	208	453	199	108	467	34	506	26	655	18	33	54	8	25	151	230	214	35	108	215	93	453	89	469	689	161	752	708	952	1286
Endogenous	LOXL1	NM_005576.2	45	19	322	186	285	148	165	146	45	393	11	359	32	39	27	3	19	17	114	87	36	15	330	59	245	64	55	224	69	220	158	160	378
Endogenous	LOXL2	NM_002318.2	51	43	93	58	47	39	76	72	30	76	10	91	21	22	13	3	15	10	31	32	15	4	40	31	53	30	28	61	75	65	74	88	114
Endogenous	LOXL4	NM_032211.6	71	75	214	133	61	36	123	150	55	347	4	73	14	15	6	4	20	14	20	18	16	18	38	34	59	42	66	89	63	109	91	121	88
Endogenous	LPA	NM_005577.2	20	26	39	27	9	10	43	35	18	1	1	16	3	1	1	1	1	1	1	1	1	1	2	2	5	4	2	7	3	3	3	3	10
Endogenous	LPAR5	NM_020400.4	49	49	82	61	25	24	84	96	42	69	3	35	9	5	3	1	3	2	3	2	7	10	21	22	56	16	14	30	15	39	37	63	31
Endogenous	LPCAT1	NM_024830.3	90	91	162	110	126	122	141	416	53	294	10	145	296	661	424	187	440	387	358	450	477	447	72	2245	2988	1614	1172	2678	3220	1759	3366	2596	2242
Endogenous	LPL	NM_000237.2	70	53	102	118	104	57	111	309	47	138	2	59	142	220	120	104	128	180	93	196	104	195	449	331	1363	193	573	1593	891	1672	2511	1914	3697
Endogenous	LRP1	NM_002332.2	230	145	820	654	941	448	494	1151	174	1285	55	1313	492	604	370	124	455	410	976	676	496	332	2375	1536	2583	1205	1481	2905	2169	3264	3340	2991	4276
Endogenous	LRP2	NM_004525.2	61	58	95	73	12	29	91	119	40	37	7	35	34	65	29	14	34	70	35	21	59	50	3	309	378	387	86	123	582	87	246	239	676
Endogenous	LRP6	NM_002336.1	55	57	162	62	61	62	112	209	66	182	9	102	105	118	94	28	77	86	110	125	93	135	265	198	400	133	219	460	314	539	439	556	472
Endogenous	LRRC32	NM_001128922.1	49	53	90	50	36	44	76	113	35	63	14	75	80	20	21	87	125	160	34	37	20	22	40	116	128	121	420	129	486	130	118	264	294
Endogenous	LTA	NM_000595.2	82	75	109	70	13	24	114	135	52	47	3	28	5	4	3	1	6	5	5	7	3	4	7	21	9	15	17	23	29	33	20	23	20
Endogenous	LTB	NM_002341.1	141	79	76	140	31	71	122	79	46	37	5	45	83	120	31	61	268	31	59	46	150	57	19	275	185	429	150	78	273	88	147	111	81
Endogenous	LYN	NM_002350.3	39	20	166	134	150	48	97	109	16	257	9	108	317	261	241	69	183	264	174	248	168	231	214	828	1402	272	464	1373	733	734	1423	1891	3075
Endogenous	MAF	NM_005360.4	122	63	187	105	199	140	128	228	57	266	20	165	149	239	110	48	221	109	483	307	227	143	363	773	1017	758	644	1068	825	901	855	836	703
Endogenous	MAML1	NM_014757.4	97	82	217	133	153	91	159	298	65	240	7	155	113	114	37	30	77	100	129	127	86	124	273	282	547	122	315	642	315	622	691	700	865
Endogenous	MAML2	NM_032427.2	53	63	135	83	58	46	123	168	38	130	7	102	97	95	32	9	46	46	122	103	63	59	199	156	374	78	258	501	242	491	450	570	530
Endogenous	MAML3	NM_018717.4	67	68	109	81	52	30	112	153	59	68	8	65	43	54	35	8	35	43	56	81	54	54	115	92	229	67	148	378	241	361	454	525	389
Endogenous	MAP1LC3A	NM_032514.2	123	107	312	128	155	138	171	290	88	348	33	196	190	184	151	116	188	228	185	330	158	236	811	413	767	305	773	910	963	1057	1318	1225	1002
Endogenous	MAP2K1	NM_002755.2	74	52	157	111	111	55	122	252	50	160	4	82	125	148	82	40	115	135	103	99	97	110	280	419	565	217	372	658	462	679	899	905	1429
Endogenous	MAP3K1	NM_005921.1	22	21	74	41	72	29	52	82	6	137	3	64	108	117	45	15	45	52	86	129	61	70	147	216	548	73	162	521	215	533	575	701	628
Endogenous	MAPK1	NM_138957.2	101	86	287	215	216	117	200	436	53	484	17	231	199	217	92	34	118	141	192	235	133	179	708	453	1336	185	516	1512	540	1285	1656	2321	2604
Endogenous	MAPK10	NM_138981.2	70	83	180	119	62	41	140	199	76	190	4	90	13	34	23	4	22	42	93	53	29	55	173	81	281	66	174	203	203	346	268	157	340
Endogenous	MAPK11	NM_002751.6	54	80	109	66	42	48	95	105	29	102	9	85	70	67	42	21	65	44	72	92	70	44	136	92	231	68	191	322	188	516	332	388	397
Endogenous	MAPK8	NM_002750.2	27	11	72	40	75	46	51	105	18	164	1	75	85	75	23	16	40	51	72	69	44	57	142	142	300	88	156	340	182	296	374	435	559
Endogenous	MAPK9	NM_001135044.1	118	91	202	163	146	92	212	283	73	274	12	169	112	136	56	15	55	68	83	113	93	121	412	231	637	74	235	728	256	634	636	1004	1033
Endogenous	MARCO	NM_006770.3	61	54	88	89	87	37	101	250	49	129	6	40	75	493	260	152	326	106	136	147	213	179	33	695	981	552	390	1623	3057	599	2117	2500	4309
Endogenous	MASP1	NM_001031849.2	1	15	22	7	11	5	26	62	6	22	1	14	13	15	18	7	7	15	14	28	19	8	132	10	127	15	53	43	84	139	117	58	89
Endogenous	MBTPS2	NM_015884.3	44	33	150	87	59	49	142	149	40	124	7	90	40	49	17	12	25	31	63	48	43	33	146	142	178	76	89	231	143	242	266	304	373
Endogenous	MECP2	NM_001110792.1	65	71	157	78	87	97	175	155	41	141	10	75	173	112	90	47	113	103	130	146	99	122	404	287	487	125	391	664	325	712	729	896	753
Endogenous	MEF2A	NM_005587.2	265	237	625	389	265	227	491	731	216	583	29	418	560	514	328	153	425	415	516	623	332	403	1949	814	1729	518	1331	2221	1537	2567	2740	2933	3102
Endogenous	MEFV	NM_000243.2	44	46	52	45	13	19	62	78	39	31	2	17	53	26	28	26	47	34	15	25	32	33	47	100	167	76	38	150	131	95	273	215	199
Endogenous	MET	NM_001127500.1	79	72	262	180	103	47	218	272	70	396	9	128	36	55	26	30	44	85	99	76	79	95	76	273	412	142	347	483	643	225	743	519	961
Endogenous	MFAP3	NM_001242336.1	23	18	47	48	34	10	45	70	20	49	4	40	30	22	6	23	20	29	33	20	36	22	73	97	108	84	87	122	142	108	184	161	217
Endogenous	MKI67	NM_002417.2	27	22	53	38	26	17	46	70	19	54	5	28	1	42	1	2	10	1	108	90	12	12	11	129	92	62	13	87	30	46	46	19	64
Endogenous	MLXIPL	NM_032951.2	42	56	57	31	12	23	90	95	40	47	3	18	17	30	14	10	15	31	12	26	7	18	44	57	87	112	66	58	125	68	142	104	88
Endogenous	MMP1	NM_002421.3	160	113	588	768	1029	82	355	290	7	924	17	101	1	178	36	4	14	12	80	11	16	5	8	107	48	115	31	72	8	11	25	66	47
Endogenous	MMP10	NM_002425.1	41	30	799	14	501	2	107	51	3	420	22	100	3	7	2	1	9	3	9	1	1	2	2	12	21	8	17	14	6	9	11	11	27
Endogenous	MMP11	NM_005940.3	176	150	2884	2484	2228	2194	1263	416	442	2138	172	2421	5	3	4	1	3	5	8	5	5	1	24	15	14	12	12	18	12	15	9	13	30
Endogenous	MMP12	NM_002426.3	32	1	31	47	30	1	17	5	1	21	1	7	1	7	4	2	29	3	2	8	7	15	6	81	15	16	6	34	26	8	15	35	21
Endogenous	MMP13	NM_002427.2	99	86	602	123	422	32	198	472	56	1558	15	165	2	3	1	1	2	1	4	1	2	1	1	3	9	4	2	6	3	9	6	9	11
Endogenous	MMP14	NM_004995.2	187	68	1610	652	1245	434	356	934	135	2647	63	1571	83	131	63	11	125	98	448	254	92	81	335	514	624	437	486	960	500	649	647	725	1301
Endogenous	MMP16	NM_005941.4	46	48	77	77	49	28	102	125	43	125	6	94	2	5	1	1	1	3	6	5	2	3	59	7	12	3	6	10	7	15	9	5	23
Endogenous	MMP2	NM_004530.2	474	270	1953	1387	2475	898	1070	3035	374	3395	188	4521	156	277	203	24	162	249	912	538	182	226	764	648	1671	382	1391	2657	975	2164	2145	1912	5131
Endogenous	MMP3	NM_002422.3	49	39	97	62	32	23	104	121	39	182	5	35	1	1	3	2	4	1	3	1	1	1	4	11	9	4	1	10	5	8	4	5	14
Endogenous	MMP7	NM_002423.3	189	146	2924	1886	4000	668	1568	4612	178	14427	170	2238	4	17	3	3	10	71	86	149	35	37	6	284	227	251	202	88	193	95	103	266	863
Endogenous	MMP8	NM_002424.2	26	30	40	33	12	17	36	40	26	21	1	17	2	1	1	8	1	14	1	1	2	2	4	10	26	6	3	62	20	6	7	9	21
Endogenous	MMP9	NM_004994.2	609	57	112	331	418	69	92	73	33	167	12	16	73	49	108	168	98	251	17	152	93	178	97	2017	585	224	156	506	219	86	829	1301	252
Endogenous	MMRN1	NM_007351.2	1	6	2	7	3	1	3	21	3	11	1	4	33	43	50	6	28	53	121	84	19	97	33	111	212	96	129	1178	163	431	751	889	877
Endogenous	MMUT	NM_000255.2	13	10	62	39	53	16	25	102	3	127	3	61	49	35	20	5	32	42	61	47	28	47	287	150	313	61	186	455	183	386	427	669	563
Endogenous	MOB1B	NM_173468.3	79	55	140	90	69	70	111	134	55	135	6	81	58	71	32	35	59	49	60	83	92	76	144	171	357	134	171	386	333	333	457	336	454
Endogenous	MS4A1	NM_152866.2	13	11	11	51	10	6	54	17	8	10	2	10	23	7	6	8	26	21	21	20	13	42	18	40	56	66	48	39	81	53	70	86	48
Endogenous	MS4A2	NM_000139.3	5	6	7	9	3	4	19	18	4	18	3	9	15	18	8	1	19	15	11	24	23	35	7	30	99	30	59	112	41	156	125	91	87
Endogenous	MS4A4A	NM_024021.2	123	104	173	177	262	88	191	379	77	274	8	85	135	254	103	60	178	133	277	278	177	215	718	2531	1861	1296	1296	2107	1581	1030	1762	1503	2865
Endogenous	MTMR4	NM_004687.4	106	101	258	165	116	100	235	291	90	220	13	154	92	100	71	52	105	74	158	136	101	73	288	433	501	289	275	549	449	560	904	912	489
Endogenous	MTOR	NM_004958.3	35	31	146	60	118	63	92	159	26	184	13	106	129	105	77	110	137	92	164	120	131	98	263	346	464	352	306	556	611	472	701	656	537
Endogenous	MUC5B	NM_002458.1	105	710	1261	69	775	30	306	124	44	1161	15	58	32	6	57	89	410	17	195	9	678	284	3	760	1487	1719	908	11	846	32	78	23	404
Endogenous	MYD88	NM_002468.3	143	132	345	232	218	168	290	409	126	381	18	285	420	586	254	202	525	248	342	334	449	288	398	942	1592	888	819	1546	1993	1066	2105	1779	2364
Endogenous	MYL2	NM_000432.3	62	45	77	52	9	21	116	87	36	37	7	32	1	1	1	3	1	2	1	1	3	4	1072	5	6	1	4	9	4	8	6	9	4
Endogenous	MYLK	NM_053032.2	375	230	1775	1201	1089	659	854	2065	472	1952	148	2162	591	635	407	93	584	580	1066	912	698	508	5603	701	3260	789	2317	4284	2249	4942	4318	3531	4437
Endogenous	NCAM1	NM_000615.5	82	86	158	156	35	139	166	216	75	72	5	160	10	19	10	2	10	14	23	28	9	8	918	17	36	20	47	61	13	89	59	82	91
Endogenous	NCEH1	NM_020792.4	91	77	184	117	140	87	135	248	82	179	14	112	69	246	83	44	133	205	130	124	80	100	144	383	736	380	383	875	759	378	774	828	1359
Endogenous	NCF1	NM_000265.4	163	105	148	114	27	76	153	128	82	72	12	37	70	100	62	46	140	45	60	60	103	56	90	455	391	223	169	180	404	158	612	424	182
Endogenous	NCF4	NM_000631.4	48	50	81	58	54	28	74	83	29	52	1	33	133	186	88	87	189	130	127	120	222	168	162	639	851	614	336	508	724	370	1061	787	421
Endogenous	NCK2	NM_001004720.2	80	99	154	119	122	108	142	224	60	209	17	119	146	109	70	35	94	90	92	116	103	100	226	197	509	135	198	592	305	582	592	650	577
Endogenous	NCKAP1L	NM_005337.4	76	24	55	121	106	54	61	133	14	88	2	42	180	252	99	33	139	85	138	138	106	131	213	810	865	289	382	896	554	530	938	924	1132
Endogenous	NCOA2	NM_006540.2	69	54	118	89	106	69	107	189	45	166	9	121	65	124	67	18	63	77	95	118	75	79	285	242	500	106	308	527	347	600	728	827	594
Endogenous	NCOR2	NM_006312.3	207	147	941	528	824	427	612	1021	184	1335	57	943	883	746	403	329	714	560	712	651	593	678	967	1947	2675	1396	1859	2912	2801	2945	4215	3986	3677
Endogenous	NCR1	NM_004829.5	3	5	4	2	4	3	5	13	1	4	1	3	10	20	3	9	11	7	4	5	25	8	7	38	75	29	35	40	41	59	98	127	39
Endogenous	NCSTN	NM_015331.2	86	70	223	157	188	82	125	267	52	367	10	164	147	174	93	41	128	115	176	152	104	128	454	539	763	251	414	955	595	849	1050	1140	1354
Endogenous	NDUFA1	NM_004541.3	201	140	733	415	542	247	398	896	130	1134	31	513	515	621	335	249	595	439	823	618	564	470	3464	2086	2842	1534	1496	3290	2581	2633	3409	3074	3579
Endogenous	NDUFB5	NM_002492.3	80	69	243	182	167	96	167	321	67	392	12	228	67	142	62	14	102	73	198	166	96	113	947	518	869	256	429	1089	527	917	1104	1024	1507
Endogenous	NDUFB6	NM_002493.5	89	64	245	117	171	101	126	222	61	285	12	150	138	181	95	76	202	111	246	166	183	124	629	521	710	425	343	792	724	702	796	716	808
Endogenous	NDUFB8	NM_001284367.1	138	108	309	183	253	104	243	422	96	359	19	207	314	296	166	117	267	167	377	292	264	250	1243	1064	1327	600	729	1587	1161	1335	1859	1640	1902
Endogenous	NDUFC1	NM_002494.2	176	144	488	230	300	185	332	551	147	615	31	346	329	409	183	225	421	269	463	377	420	315	1746	1346	1291	1026	972	1702	2019	1430	1982	1616	2079
Endogenous	NDUFS3	NM_004551.1	144	108	340	225	267	123	226	463	82	498	16	248	149	234	106	44	171	112	268	199	126	173	714	569	922	331	393	1106	717	957	1243	1203	1462
Endogenous	NDUFS5	NM_004552.2	300	209	884	593	962	257	510	763	197	1149	53	796	613	721	275	229	484	315	1036	612	508	478	2768	1972	2203	822	1521	2839	2435	1927	2721	2867	4912
Endogenous	NEDD8	NM_006156.2	149	125	393	316	334	165	325	496	114	513	23	350	191	186	68	46	137	120	313	176	185	156	801	601	1070	325	382	1521	801	1013	1611	1713	2169
Endogenous	NF1	NM_000267.2	33	32	234	112	158	90	115	279	45	284	7	166	149	151	84	58	159	150	198	180	141	153	486	507	709	383	556	792	707	693	1015	938	1237
Endogenous	NFAM1	NM_145912.5	83	70	101	65	30	30	97	107	53	34	10	28	72	32	14	16	45	24	27	34	44	33	34	172	226	131	139	113	180	105	221	190	141
Endogenous	NFKB1	NM_003998.2	48	29	71	79	48	29	82	106	26	122	5	46	56	34	19	10	59	120	27	33	35	33	101	112	268	53	122	192	204	180	245	363	710
Endogenous	NID1	NM_002508.2	58	33	226	119	199	49	111	569	39	305	8	216	143	155	239	60	149	468	562	474	153	191	718	515	1112	725	1502	3200	2197	3094	3896	2534	2980
Endogenous	NID2	NM_007361.3	44	17	207	60	225	36	69	223	16	351	9	141	58	52	50	29	66	37	283	197	73	42	244	145	349	269	177	786	384	196	215	153	595
Endogenous	NKG7	NM_005601.3	81	83	92	77	34	34	126	149	44	46	8	23	142	383	100	99	155	92	59	67	228	125	30	541	635	143	258	286	242	645	873	820	277
Endogenous	NLRC4	NM_001199138.1	89	65	114	107	33	28	116	147	58	71	5	55	94	75	23	40	71	30	48	46	65	60	30	240	366	212	150	260	304	151	370	251	271
Endogenous	NLRP3	NM_001079821.2	52	34	54	40	24	23	52	52	25	36	4	33	92	75	55	13	125	168	35	110	34	37	30	68	112	61	110	144	138	299	178	155	705
Endogenous	NOS1	NM_000620.4	57	61	104	59	18	19	95	102	42	45	6	30	7	7	3	7	10	9	12	6	5	2	8	20	46	16	20	47	43	115	71	63	39
Endogenous	NOS3	NM_000603.4	25	19	24	18	10	12	28	39	15	10	2	12	62	44	29	21	21	54	45	31	25	30	50	77	121	19	234	149	47	292	130	232	368
Endogenous	NOTCH1	NM_017617.3	86	92	328	145	223	98	197	305	46	462	15	147	215	184	107	45	114	143	167	246	145	155	318	429	1078	187	485	1155	493	1052	1332	1580	1643
Endogenous	NOTCH2	NM_024408.3	110	65	469	229	380	221	231	547	72	669	26	431	298	257	142	101	244	198	306	352	279	203	880	863	1401	603	742	1213	1001	1087	1562	1564	1668
Endogenous	NOTCH3	NM_000435.2	59	72	499	106	362	100	188	412	49	696	31	247	141	166	126	32	215	139	219	277	209	173	954	355	784	250	409	997	653	710	786	415	1261
Endogenous	NOTCH4	NM_004557.3	72	78	146	92	26	42	129	239	47	93	10	61	175	136	125	22	93	118	175	193	159	155	164	429	1220	85	553	1141	450	1751	1686	1720	1566
Endogenous	NPC1	NM_000271.3	120	88	198	107	146	78	160	336	60	249	13	102	197	266	140	63	171	311	185	260	136	173	177	578	1238	370	569	1149	659	877	1203	1759	1680
Endogenous	NPHP4	NM_015102.3	56	64	131	92	69	49	123	152	53	119	7	56	50	47	28	16	30	23	46	63	40	27	67	105	241	69	167	224	119	214	296	244	324
Endogenous	NR1H2	NM_007121.4	40	40	61	33	41	32	61	71	18	69	10	40	42	62	40	26	55	48	44	62	45	53	148	137	229	115	195	193	204	195	271	227	211
Endogenous	NR1H3	NM_005693.2	65	42	69	57	37	19	75	90	36	46	5	29	34	47	17	37	45	22	85	57	36	44	80	441	246	195	269	266	362	159	197	163	183
Endogenous	NR1H4	NM_001206977.1	35	37	32	37	13	14	55	52	36	14	3	22	1	1	1	1	4	1	1	3	1	3	7	3	8	5	3	7	2	8	3	8	6
Endogenous	NRIP3	NM_020645.2	2	1	3	7	18	1	4	10	3	11	2	6	6	4	2	4	9	15	8	14	1	5	18	30	30	27	10	28	27	23	23	12	71
Endogenous	NRP2	NM_003872.2	93	98	467	231	388	150	193	369	62	544	31	363	221	272	193	116	175	183	226	262	154	182	273	1018	971	486	700	1142	939	1016	1255	1254	2372
Endogenous	NUMB	NM_001005743.1	100	82	255	120	183	77	171	366	79	287	19	149	259	200	117	75	203	165	225	238	178	226	383	463	1241	226	584	1341	702	1345	1597	1555	1461
Endogenous	OAS1	NM_001032409.1	97	92	153	126	105	67	121	166	78	174	15	84	181	316	90	44	107	55	103	104	108	57	733	530	597	306	306	800	354	501	640	663	240
Endogenous	OASL	NM_198213.1	36	46	48	43	8	15	65	59	27	34	4	18	17	34	17	13	6	20	9	12	18	9	71	32	62	15	57	110	113	70	131	83	134
Endogenous	OCLN	NM_002538.3	61	80	167	109	91	55	126	276	52	180	10	149	66	69	37	17	61	72	59	96	67	94	29	231	522	92	331	657	368	535	1257	1229	1225
Endogenous	OGT	NM_181673.2	94	94	253	144	196	96	228	373	70	287	14	179	158	251	119	97	189	241	272	240	244	270	476	678	1193	588	963	1367	1081	1183	1587	1431	1875
Endogenous	OSBPL5	NM_020896.3	4	2	21	15	28	10	10	33	4	25	1	22	8	32	10	4	22	14	20	26	15	16	70	31	84	29	65	101	72	120	134	146	152
Endogenous	P2RY13	NM_176894.1	67	84	101	75	21	37	110	111	43	53	6	46	19	38	19	17	38	22	9	31	30	26	39	130	158	74	55	132	136	124	457	208	111
Endogenous	P3H3	NM_014262.4	63	26	204	91	157	75	82	215	40	203	17	220	19	20	15	7	26	23	98	48	25	17	92	57	101	104	62	108	84	110	118	104	177
Endogenous	P4HB	NM_000918.3	220	144	876	517	937	391	469	1362	163	1364	70	1056	460	569	290	147	541	346	1150	623	440	423	980	2640	3342	1461	1171	4822	2233	2814	3010	3836	5666
Endogenous	PANX1	NM_015368.3	82	107	226	145	122	85	187	252	82	216	12	165	122	40	28	32	82	67	79	118	48	36	221	185	300	93	229	405	231	306	350	484	1038
Endogenous	PARP1	NM_001618.3	84	72	188	165	123	63	167	268	66	232	10	116	119	128	52	48	110	75	141	98	106	80	317	384	581	235	219	564	438	457	584	675	836
Endogenous	PARP4	NM_006437.3	149	97	282	211	265	198	267	511	83	636	16	289	245	340	171	124	235	160	302	312	262	270	381	858	1242	586	784	1326	1224	1254	1742	1884	1633
Endogenous	PC	NM_000920.3	30	56	76	56	51	26	76	101	36	73	7	40	15	26	27	15	31	14	52	47	18	13	54	123	92	167	104	137	175	95	118	135	176
Endogenous	PCCB	NM_000532.4	31	17	120	48	78	29	44	128	17	152	3	74	42	93	60	35	97	52	130	79	84	83	416	371	514	266	231	548	466	351	638	483	576
Endogenous	PCK1	NM_002591.2	9	23	23	18	2	3	17	25	7	13	1	5	3	2	2	1	5	1	3	1	1	1	12	7	7	8	3	9	10	8	9	9	13
Endogenous	PDE2A	NM_001143839.1	12	31	9	13	12	7	15	22	7	15	1	6	51	26	28	10	41	29	77	85	29	53	188	77	116	49	155	326	172	231	164	243	303
Endogenous	PDE3B	NM_000922.3	102	86	145	109	67	54	117	209	64	187	9	95	51	94	47	38	90	47	104	72	64	56	131	123	329	163	216	402	362	506	511	508	551
Endogenous	PDGFB	NM_033016.2	56	78	113	56	12	24	96	165	52	67	3	33	94	11	11	19	45	9	28	45	19	10	38	37	135	38	83	134	266	176	90	125	212
Endogenous	PDGFRB	NM_002609.3	210	151	675	252	678	216	486	885	116	1042	52	492	391	367	395	78	260	549	801	625	334	321	1294	478	1241	479	1046	2581	1360	2867	2520	2053	2633
Endogenous	PDHA1	NM_000284.3	15	23	89	40	76	38	40	109	30	145	3	64	89	79	54	27	49	57	91	62	68	72	808	193	343	142	166	455	259	435	426	493	511
Endogenous	PECAM1	NM_000442.3	107	100	82	115	124	85	169	1072	34	216	2	131	1468	1361	916	229	486	1135	1044	1375	952	1261	1014	1919	6406	709	3051	11270	2642	11416	11016	16331	9839
Endogenous	PELI1	NM_020651.3	161	109	327	190	246	240	317	359	145	358	13	144	475	430	471	71	310	951	175	492	206	348	332	670	1468	263	1012	1136	1129	1933	1413	2775	5027
Endogenous	PELI2	NM_021255.2	5	2	23	8	21	12	12	50	4	46	4	12	35	29	25	9	17	36	41	56	24	39	97	77	241	26	102	327	82	223	188	340	252
Endogenous	PGM1	NM_001172818.1	93	88	229	172	174	83	203	288	81	292	15	218	78	107	36	33	78	108	118	114	87	77	434	411	629	225	246	484	483	681	905	568	1165
Endogenous	PHLPP1	NM_194449.3	34	41	94	60	49	39	90	160	37	113	6	54	34	41	26	16	49	46	44	64	38	57	116	95	240	59	168	247	165	351	333	365	423
Endogenous	PHYKPL	NM_153373.3	68	58	65	44	35	37	68	80	35	74	6	23	74	73	32	44	84	31	72	64	74	76	59	234	218	197	196	184	307	217	300	230	220
Endogenous	PIDD1	NM_145886.2	17	12	20	15	20	14	14	23	22	28	6	30	22	17	14	17	31	19	43	36	29	21	22	102	76	96	48	83	143	74	111	84	62
Endogenous	PIK3C3	NM_002647.2	80	87	187	103	84	63	131	189	55	154	5	111	75	76	54	44	88	74	107	124	97	88	211	270	352	184	273	433	351	509	665	634	598
Endogenous	PIK3CA	NM_006218.2	82	72	146	85	105	52	143	255	50	186	9	87	104	95	64	40	70	111	121	110	74	88	289	259	526	173	357	564	387	637	791	764	773
Endogenous	PIK3CB	NM_006219.1	76	82	137	98	57	56	129	181	54	129	10	72	42	59	26	8	51	50	33	56	39	39	105	209	282	126	135	256	268	222	356	404	385
Endogenous	PIK3R4	NM_014602.1	64	82	167	116	97	61	152	244	84	236	14	133	83	95	43	18	45	64	78	108	60	78	235	188	399	96	173	497	229	485	553	638	636
Endogenous	PIK3R5	NM_001142633.1	141	96	195	172	124	71	189	209	98	180	7	72	222	189	138	70	186	123	156	155	149	90	108	611	679	401	486	781	717	516	845	857	1086
Endogenous	PKHD1	NM_138694.3	86	85	141	115	34	49	162	127	77	76	5	68	2	1	1	2	4	2	3	2	1	4	3	4	11	10	18	12	7	19	23	17	19
Endogenous	PLCB2	NM_004573.2	16	6	17	23	30	10	22	22	2	17	1	9	48	63	30	10	43	20	30	47	46	37	38	143	290	34	110	163	189	156	250	228	216
Endogenous	PLCB3	NM_000932.2	29	37	85	37	29	23	59	69	18	46	3	42	22	36	27	8	20	19	50	37	28	25	39	84	109	50	61	112	81	105	138	110	121
Endogenous	PLCG1	NM_002660.2	69	78	244	120	144	95	165	301	60	275	11	146	93	119	39	18	84	99	125	150	107	112	280	196	469	114	332	763	314	872	1111	1192	780
Endogenous	PLCG2	NM_002661.2	23	19	19	53	19	13	41	33	9	20	1	9	88	69	59	29	78	77	69	96	70	199	93	272	384	146	203	289	261	301	415	419	291
Endogenous	PLG	NM_000301.3	1	3	1	1	1	2	1	1	1	4	1	10	1	1	2	1	1	1	4	3	3	2	3	8	8	2	6	14	11	5	5	15	10
Endogenous	PLIN4	NM_001080400.1	67	78	101	66	17	38	126	119	61	62	2	26	22	10	22	10	15	77	23	39	22	24	835	75	87	46	135	170	140	84	161	164	128
Endogenous	PLPP4	NM_001030059.1	94	90	432	156	233	120	163	191	122	235	22	270	1	3	4	1	7	2	3	3	2	6	5	7	13	9	6	20	11	21	12	10	19
Endogenous	PLTP	NM_006227.2	264	138	642	286	914	176	418	1006	129	832	56	821	339	325	167	106	383	245	2345	926	628	320	5882	9192	4609	11064	4577	2106	4044	1598	1758	1074	6712
Endogenous	PNOC	NM_001284244.1	54	49	52	77	10	27	71	67	23	28	1	17	5	5	2	1	1	4	2	3	5	5	6	24	15	8	12	17	22	28	23	22	26
Endogenous	PNPLA3	NM_025225.2	52	59	110	68	22	33	105	105	47	59	8	34	3	8	9	8	18	2	9	6	5	6	4	12	30	49	18	68	65	18	49	68	30
Endogenous	POSTN	NM_001135935.1	1039	482	12590	1328	7013	1095	2697	7928	858	16610	784	8994	49	89	60	16	41	52	155	303	74	137	420	174	367	276	350	1100	171	622	1445	171	944
Endogenous	PPARA	NM_001001928.2	43	46	92	57	55	35	103	129	42	92	6	50	17	31	14	9	23	30	26	40	20	31	171	83	166	72	120	211	126	228	219	254	228
Endogenous	PPARD	NM_006238.4	13	6	23	17	32	13	27	40	8	50	4	22	57	23	19	29	29	33	27	33	37	19	55	60	129	67	93	102	124	78	114	91	209
Endogenous	PPARG	NM_005037.5	12	16	51	46	51	27	34	88	11	82	4	53	84	165	71	36	94	71	108	96	58	69	117	215	431	153	195	510	492	366	671	759	765
Endogenous	PPARGC1A	NM_013261.3	85	110	157	96	69	19	149	205	35	163	6	54	37	29	35	16	18	77	37	36	28	37	324	95	211	74	178	184	128	246	259	180	306
Endogenous	PPM1A	NM_021003.4	146	141	399	225	222	121	309	480	99	446	22	203	160	207	132	76	176	228	230	288	207	187	776	503	1058	419	659	1079	798	1326	1632	1534	1442
Endogenous	PPP2CA	NM_002715.2	64	65	311	165	298	164	164	411	37	590	17	309	350	273	161	104	213	294	332	261	225	199	992	769	1478	411	795	1497	919	1175	1537	1815	2771
Endogenous	PRAP1	NM_145202.4	16	32	24	19	9	15	39	36	19	16	3	7	1	3	5	2	1	1	5	1	5	1	11	5	11	6	6	15	5	9	7	10	10
Endogenous	PRDX1	NM_002574.2	495	287	1359	836	1234	551	765	1663	215	2257	94	979	1278	1702	686	432	1400	979	1864	1073	1250	1096	3027	4787	6961	2377	2786	8803	4752	5471	7553	8102	9271
Endogenous	PRDX6	NM_004905.2	221	192	422	317	296	212	306	675	129	614	33	424	546	434	257	231	349	548	594	545	362	308	1204	1252	1521	727	1120	2430	1853	2377	3009	3158	3020
Endogenous	PREX1	NM_020820.3	55	46	59	68	41	41	84	133	30	57	7	28	123	113	69	31	65	92	84	98	143	100	137	406	856	197	319	446	422	849	1225	815	677
Endogenous	PRF1	NM_005041.3	97	72	101	92	37	33	119	199	74	58	5	30	126	239	87	120	171	169	36	51	152	70	19	167	409	111	288	305	219	538	697	955	286
Endogenous	PRKAA1	NM_006251.5	79	57	199	150	141	85	157	327	47	361	9	151	175	160	77	33	109	124	150	176	133	148	516	357	788	215	481	1170	535	1030	1290	1436	1645
Endogenous	PRKAB2	NM_005399.3	150	114	358	189	230	118	224	450	84	423	24	298	66	73	55	27	48	52	176	105	74	81	501	188	349	125	173	465	234	457	539	503	443
Endogenous	PRKACA	NM_002730.3	54	41	284	128	249	93	114	345	44	400	17	229	261	290	174	79	263	191	375	305	236	233	1722	746	1224	594	598	1480	988	1370	1593	1541	1733
Endogenous	PRKACB	NM_182948.2	12	4	47	36	44	16	33	61	7	84	3	41	26	33	15	5	15	12	26	25	9	9	229	74	152	41	80	158	81	146	192	187	225
Endogenous	PRKAG1	NM_002733.3	38	21	69	79	71	54	92	117	27	133	5	76	52	47	23	8	36	25	53	47	36	42	240	158	238	90	123	351	171	259	344	406	459
Endogenous	PRKAG2	NM_016203.3	93	85	140	126	93	44	140	220	48	166	1	87	64	71	38	11	41	57	72	79	39	55	1270	163	413	65	211	566	212	563	628	732	821
Endogenous	PRKCA	NM_002737.2	10	13	42	27	43	23	27	98	9	91	3	49	58	45	28	6	28	40	60	70	31	50	54	120	223	71	164	402	167	326	340	331	389
Endogenous	PRKDC	NM_006904.6	253	212	531	308	295	186	434	599	172	515	35	379	339	347	208	344	488	245	678	317	420	196	551	1052	1006	1552	742	1088	1791	951	1488	1253	1271
Endogenous	PRLR	NM_001204318.1	37	51	72	61	13	20	63	82	39	50	1	54	3	3	1	1	1	1	3	6	1	3	9	9	30	7	9	17	14	26	14	7	14
Endogenous	PROS1	NM_000313.1	165	142	291	227	121	135	272	522	126	317	22	239	170	172	61	38	119	115	191	216	261	174	1141	600	1104	347	569	1125	686	968	1567	1275	1721
Endogenous	PSEN2	NM_000447.2	17	21	47	44	46	24	59	67	9	81	3	41	43	45	24	12	48	44	42	44	44	42	102	95	223	67	127	287	212	224	372	354	278
Endogenous	PSENEN	NM_172341.1	64	44	283	80	105	45	144	204	41	333	4	75	62	62	49	65	212	97	151	88	109	107	170	459	524	454	412	434	804	475	760	473	721
Endogenous	PSMB1	NM_002793.2	27	42	111	97	84	28	68	141	29	151	3	94	71	100	57	35	126	84	85	73	58	109	329	349	480	115	272	500	343	542	773	903	1057
Endogenous	PSMB7	NM_002799.2	105	93	315	219	311	126	195	387	88	535	20	288	224	249	123	43	163	160	298	237	147	177	775	609	1111	294	514	1521	779	1315	1567	1647	2198
Endogenous	PSMB8	NM_004159.4	94	84	263	281	296	141	182	354	37	432	20	178	407	479	154	89	389	198	378	368	332	218	447	1334	2221	653	705	1908	1214	1627	2161	1979	2042
Endogenous	PSMC3	NM_002804.4	54	44	46	43	11	16	57	62	30	29	1	28	6	11	11	4	13	8	21	10	6	4	19	32	58	28	20	54	47	33	51	52	55
Endogenous	PSMD13	NM_175932.2	103	81	202	182	139	62	184	292	77	265	11	164	119	94	50	30	72	46	125	101	65	79	365	281	695	111	249	987	339	679	871	1243	1495
Endogenous	PTAFR	NM_000952.3	93	87	144	105	53	59	102	135	47	96	5	45	97	140	68	53	149	56	123	97	94	82	57	709	662	314	236	454	646	224	548	480	554
Endogenous	PTCH1	NM_000264.4	64	74	120	64	71	61	135	170	51	123	8	70	16	22	17	6	25	36	49	43	36	32	67	66	171	47	117	248	100	347	414	526	184
Endogenous	PTGER4	NM_000958.2	133	121	125	94	49	90	135	216	68	109	10	44	129	215	141	70	335	147	123	223	121	156	92	345	469	380	503	528	813	855	867	829	587
Endogenous	PTGS2	NM_000963.1	70	61	174	113	83	112	149	222	88	311	16	107	96	100	32	37	214	386	101	255	54	90	87	105	209	292	529	209	510	405	355	669	1372
Endogenous	PTK2	NM_005607.4	132	122	480	190	272	128	304	549	119	552	29	253	211	239	109	69	183	166	272	284	230	202	607	375	864	248	562	1094	673	1021	1265	1126	1329
Endogenous	PTK2B	NM_004103.3	126	87	129	118	93	51	172	180	49	122	11	47	139	214	135	68	201	170	114	144	151	170	146	617	792	367	578	795	794	874	1490	1372	1793
Endogenous	PTPA	NM_021131.4	38	41	163	98	130	75	110	230	36	273	6	151	71	89	37	33	80	69	142	84	89	85	275	353	437	179	224	576	398	465	612	584	709
Endogenous	PTPN1	NM_002827.3	38	34	174	201	250	102	137	360	25	429	10	185	434	357	192	99	295	373	212	330	234	284	399	681	1445	315	882	2137	871	1634	1999	3020	5217
Endogenous	PTPN11	NM_002834.3	265	258	588	428	318	220	539	814	208	693	31	401	408	235	138	74	217	227	273	285	203	247	1272	598	1278	321	654	1615	791	1551	1913	2523	2237
Endogenous	PTPN12	NM_002835.3	84	67	224	187	225	99	154	448	69	342	8	193	254	208	91	49	167	190	189	248	139	161	485	483	1309	143	610	1464	525	1327	1644	2473	2458
Endogenous	PTPN6	NM_002831.5	69	46	90	73	72	61	71	110	33	112	3	43	134	193	84	72	138	102	106	147	120	126	95	446	684	226	302	623	562	535	930	931	1041
Endogenous	PTPRC	NM_080923.2	81	60	94	100	64	44	117	123	39	103	5	43	103	166	69	38	163	104	80	81	88	151	78	337	702	253	319	522	427	580	921	932	855
Endogenous	PYGM	NM_001164716.1	1	2	9	2	3	3	2	10	10	8	1	4	17	16	4	5	14	10	16	23	7	14	353	29	63	23	49	60	54	80	84	85	91
Endogenous	RAB7B	NM_001164522.1	85	62	183	86	77	39	130	176	74	179	16	98	10	24	15	44	53	62	61	46	16	16	34	58	123	141	97	142	222	72	89	69	229
Endogenous	RAC1	NM_006908.4	356	313	1083	659	891	429	789	1405	241	1645	77	980	1137	1005	637	400	778	771	1102	1102	806	811	1929	2621	4202	1545	2315	5395	3807	5402	5926	6213	6918
Endogenous	RAC2	NM_002872.4	33	8	20	36	47	18	27	36	6	80	1	4	133	203	58	60	187	77	37	58	92	88	42	204	369	170	146	413	337	324	476	564	476
Endogenous	RAC3	NM_005052.2	35	42	66	50	33	71	63	68	32	57	6	61	4	18	19	11	14	8	51	33	31	21	15	79	51	141	61	85	129	63	72	61	67
Endogenous	RAP1B	NM_001010942.2	411	337	863	687	594	360	673	1146	260	1135	41	681	885	745	369	251	504	580	570	737	481	568	1123	1495	2901	742	1845	3820	2105	3874	4110	4393	6844
Endogenous	RAPGEF1	NM_005312.2	97	61	200	148	241	88	155	279	29	325	11	179	376	401	307	130	329	341	246	370	251	296	559	699	1439	388	858	1658	940	1838	1698	1947	1962
Endogenous	RAPGEF2	NM_014247.2	82	81	141	83	82	56	153	202	62	173	7	89	87	89	64	25	96	84	94	120	73	77	180	225	414	114	284	492	404	524	747	779	665
Endogenous	RASGRP4	NM_170604.1	64	63	109	59	22	25	112	103	42	51	8	28	78	68	38	47	89	63	72	93	74	71	87	229	339	203	134	272	353	184	517	399	196
Endogenous	RBX1	NM_014248.2	167	118	521	277	392	214	309	678	124	656	24	555	519	448	262	117	390	295	581	479	341	370	998	1119	1825	648	962	2408	1361	2067	2385	2827	2654
Endogenous	RELA	NM_021975.3	81	77	204	105	105	65	146	208	62	170	7	103	141	159	105	107	222	217	112	165	153	130	232	416	574	384	509	590	822	631	794	885	923
Endogenous	RELB	NM_006509.3	9	11	44	35	27	11	32	32	6	63	1	27	97	62	57	21	101	98	28	50	24	36	45	100	209	23	135	171	156	146	127	228	594
Endogenous	RELN	NM_005045.2	1	2	2	1	6	1	5	7	1	2	1	1	11	8	5	3	7	9	15	11	5	14	46	20	39	15	22	66	26	52	55	51	85
Endogenous	RETN	NM_020415.2	1	1	1	2	4	2	1	9	1	6	1	5	12	88	22	21	69	20	7	33	16	30	2	68	88	31	37	108	170	57	158	85	82
Endogenous	RGS7	NM_002924.2	22	24	27	38	9	8	25	37	19	15	1	26	1	4	3	1	2	1	2	1	2	2	4	4	9	8	4	5	8	10	8	5	17
Endogenous	RHO	NM_000539.2	76	92	116	73	12	41	122	125	44	41	6	32	1	3	1	1	1	2	4	6	4	2	7	8	7	5	7	14	11	19	13	14	21
Endogenous	RIPK3	NM_006871.3	53	64	104	79	66	35	111	153	54	66	9	55	62	52	25	17	27	20	53	58	35	42	43	164	242	74	159	254	156	211	315	268	230
Endogenous	RNF111	NM_017610.6	125	112	275	157	151	102	199	333	88	275	15	172	165	145	67	77	118	85	172	160	115	119	344	383	694	247	450	713	581	614	883	967	1041
Endogenous	RNF152	NM_173557.2	91	119	178	113	54	53	185	225	80	149	5	57	63	54	73	24	52	136	90	96	53	61	125	54	349	78	292	590	284	457	452	382	475
Endogenous	ROCK2	NM_004850.3	47	49	190	111	146	100	143	369	53	355	14	217	276	277	162	104	236	269	302	369	248	236	833	493	1046	508	751	1597	1116	2114	2112	2296	2269
Endogenous	RORA	NM_134261.2	57	57	139	74	69	77	97	218	51	178	7	88	109	87	67	17	60	107	55	106	57	61	151	99	287	92	279	395	208	685	560	612	545
Endogenous	RPS27A	NM_002954.5	1321	1159	4026	3523	3521	1605	3439	6384	907	6453	201	3891	3532	3573	1996	1829	4604	3429	5535	4316	3945	3364	9691	14998	21814	13975	12080	21136	22921	19215	26553	24422	35244
Endogenous	RPS6KA2	NM_021135.4	37	50	66	59	46	45	87	134	34	90	8	48	64	78	80	43	63	111	106	121	87	99	156	455	408	315	368	660	706	525	715	823	544
Endogenous	RPS6KB2	NM_003952.2	21	27	46	24	44	25	30	61	18	60	1	41	82	72	53	55	74	64	90	67	80	63	97	231	260	206	198	325	354	264	391	352	345
Endogenous	S100A12	NM_005621.1	72	61	96	84	17	28	123	128	36	68	4	55	680	387	282	497	132	609	65	112	216	898	94	346	3252	190	230	2347	597	383	5302	2503	1326
Endogenous	S100A4	NM_002961.2	138	129	499	427	557	230	444	1325	106	777	28	329	1009	1440	870	335	1150	621	1756	878	1548	904	2184	3026	7126	2535	3118	8547	5407	6469	10888	7580	8152
Endogenous	SAA1	NM_199161.1	226	107	863	235	1675	27	322	412	19	1741	32	181	86	32	48	289	577	75	75	175	781	254	150	6146	1032	9464	2817	338	4528	237	155	326	3386
Endogenous	SCD	NM_005063.4	120	117	383	285	345	243	257	688	93	505	9	212	423	521	275	77	321	228	405	533	298	313	65	651	4080	863	1524	4325	1989	1672	3459	3030	10231
Endogenous	SCIN	NM_033128.3	54	54	114	86	31	29	119	161	31	73	3	53	20	29	8	6	29	30	47	56	22	67	25	150	246	46	124	268	137	153	280	209	424
Endogenous	SDC3	NM_014654.3	133	99	329	193	240	130	258	528	129	306	23	301	176	187	98	51	172	120	178	160	220	84	502	855	644	602	582	581	726	818	831	711	949
Endogenous	SEC24C	NM_004922.2	86	74	290	132	207	117	154	255	67	364	17	236	283	301	145	217	307	190	375	264	308	200	489	944	1118	868	793	1181	1409	974	1301	1326	1274
Endogenous	SEC61B	NM_006808.2	177	129	606	544	595	286	447	797	145	1093	33	805	606	379	241	112	353	371	669	431	240	370	822	1465	2393	619	903	3281	1569	2080	2473	3642	5311
Endogenous	SEH1L	NM_001013437.1	91	91	156	145	112	68	144	218	68	204	5	128	228	124	65	37	92	63	90	97	79	89	252	234	479	81	285	723	254	485	591	947	1282
Endogenous	SELENOS	NM_203472.1	48	63	90	38	26	31	88	118	43	66	2	45	44	35	26	19	51	34	33	20	23	20	39	79	96	55	61	117	95	142	150	134	147
Endogenous	SEM1	NM_001201451.1	40	33	94	66	21	18	82	88	38	42	4	28	2	1	1	1	1	1	1	1	2	1	3	3	9	6	3	7	6	3	7	8	10
Endogenous	SERPINE1	NM_000602.2	813	335	2084	1079	2415	1567	665	1626	414	2669	253	1373	1411	507	670	712	870	2645	1695	853	493	389	681	872	1579	410	2814	3263	1674	3780	706	3612	17032
Endogenous	SERPINF1	NM_002615.4	504	201	1495	1203	1807	911	878	1916	235	3091	100	1978	294	397	241	82	393	483	1370	856	367	363	2763	983	1898	1518	1991	1762	1764	2655	2416	1333	6003
Endogenous	SERPING1	NM_000062.2	370	248	826	822	715	356	590	1344	183	1129	78	862	928	1049	722	285	1234	1269	1062	1201	844	965	5141	2361	4780	1834	6118	7285	4904	10809	10866	11748	9576
Endogenous	SERPINH1	NM_001235.2	463	200	2531	1048	2323	1299	1025	2742	390	3444	178	3402	962	522	292	261	750	390	1878	960	598	294	1375	1746	2487	1492	1195	2769	2329	1682	1802	2014	7424
Endogenous	SH2D1A	NM_002351.4	2	3	2	4	3	2	4	7	1	3	1	2	6	7	8	3	12	6	7	3	9	7	1	23	32	17	43	12	26	43	38	52	32
Endogenous	SIGLEC5	NM_003830.3	61	53	96	54	12	18	96	85	41	28	3	31	59	63	25	62	40	36	35	39	89	24	25	403	265	119	51	167	157	62	184	163	142
Endogenous	SIL1	NM_001037633.1	103	78	207	153	132	69	168	278	60	278	15	170	74	96	46	13	64	51	128	89	70	89	327	315	509	91	203	674	216	565	451	704	969
Endogenous	SIRT1	NM_012238.4	90	93	186	151	93	86	195	264	71	237	12	133	99	89	56	31	72	109	79	143	73	97	299	285	457	140	364	537	382	753	891	1019	834
Endogenous	SKI	NM_003036.2	164	119	407	255	251	183	364	567	125	394	22	383	342	291	275	146	344	400	377	459	326	225	988	866	1387	621	1139	1392	1327	1776	2085	1954	2995
Endogenous	SKP1	NM_170679.2	407	339	1586	1000	1169	659	997	2017	352	2272	78	1335	941	974	569	359	1014	896	1260	1025	897	895	4592	3012	4373	2071	2769	5228	4422	5201	6722	6256	7894
Endogenous	SKP2	NM_005983.2	130	84	188	116	64	74	205	243	85	147	19	81	32	43	24	31	31	22	123	51	50	46	118	272	265	149	104	305	263	242	300	278	291
Endogenous	SLC25A10	NM_012140.3	28	18	61	26	27	19	48	47	12	69	2	28	9	37	14	17	33	18	57	41	21	29	40	103	76	81	60	115	117	84	78	91	76
Endogenous	SLC25A13	NM_001160210.1	109	79	183	111	79	60	176	206	68	183	9	98	43	67	31	25	60	33	69	58	46	71	109	190	303	110	164	387	198	312	476	477	545
Endogenous	SLC2A2	NM_000340.1	53	51	86	78	27	21	97	78	37	96	4	45	2	1	1	2	2	1	1	1	2	1	1	3	8	3	2	4	5	4	3	4	9
Endogenous	SLC37A4	NM_001164277.1	62	69	112	55	39	37	111	139	54	64	3	34	25	34	23	21	42	20	65	51	45	30	48	191	165	129	94	184	198	169	206	154	218
Endogenous	SMAD2	NM_001003652.3	73	47	385	283	421	215	240	511	63	690	16	427	313	296	137	86	156	193	334	321	212	277	873	650	1405	318	714	1842	822	1636	1866	2414	2177
Endogenous	SMAD3	NM_005902.3	110	118	299	146	152	108	229	326	91	330	16	200	207	131	92	50	114	199	185	196	131	129	411	204	569	98	492	635	331	617	809	982	945
Endogenous	SMAD4	NM_005359.3	143	145	380	215	224	148	267	515	138	388	23	275	274	196	135	102	201	237	262	302	270	224	601	610	1150	477	776	1188	850	1318	1678	1676	1407
Endogenous	SMAD6	NR_027654.1	5	10	11	3	10	8	5	109	3	18	3	6	34	68	52	56	67	102	133	68	125	168	111	470	1494	152	234	765	659	2995	1248	621	442
Endogenous	SMARCC2	NM_001130420.1	90	89	303	185	241	154	225	395	87	468	17	238	176	201	90	24	122	137	253	216	138	180	723	357	1027	163	489	1182	400	1390	1406	1779	1289
Endogenous	SMURF1	NM_181349.1	78	68	221	109	136	91	142	220	66	248	19	115	101	111	105	38	90	154	77	165	76	96	180	215	400	127	401	542	407	487	680	713	934
Endogenous	SNAI2	NM_003068.3	45	31	144	94	210	54	72	168	16	354	5	155	48	55	36	9	48	39	279	89	56	18	101	131	138	141	112	293	153	436	359	250	656
Endogenous	SOD1	NM_000454.4	77	59	129	82	51	73	85	120	46	130	9	70	67	70	58	45	88	59	89	69	86	56	356	197	352	219	219	353	392	335	419	399	398
Endogenous	SORBS1	NM_001034956.1	64	57	241	159	157	111	135	267	109	193	9	185	204	114	132	70	149	257	96	172	83	161	5918	159	690	177	661	642	456	1191	997	1026	1211
Endogenous	SOS1	NM_005633.2	117	103	236	144	142	116	193	289	72	236	10	158	159	168	73	32	115	96	192	166	125	149	377	346	570	192	414	606	454	603	666	711	545
Endogenous	SP1	NM_003109.1	107	94	250	143	122	89	209	259	88	289	16	157	117	140	70	30	88	116	124	118	112	94	252	333	588	177	350	512	385	530	657	730	438
Endogenous	SP3	NM_003111.3	162	134	360	239	311	157	284	529	108	602	22	319	400	305	167	40	138	175	365	364	154	256	792	579	1443	158	658	1848	467	1868	1735	2440	2373
Endogenous	SPIB	NM_003121.3	37	14	24	27	6	11	36	20	15	20	1	14	4	4	1	2	7	8	3	9	2	7	3	13	9	6	11	18	13	15	18	19	18
Endogenous	SPOP	NM_001007226.1	26	13	69	51	66	47	34	124	23	131	5	70	65	91	20	18	56	45	83	69	76	53	329	175	374	86	209	395	215	425	523	613	473
Endogenous	SPOPL	NM_001001664.1	228	235	405	360	145	136	488	606	212	352	18	215	122	117	58	27	54	85	119	161	88	115	413	241	564	109	284	655	242	693	780	925	915
Endogenous	SPP1	NM_000582.2	60	39	248	142	961	59	100	100	25	644	3	28	30	46	22	12	21	16	507	211	64	34	168	1454	549	414	128	2047	458	30	20	38	1533
Endogenous	SRC	NM_005417.3	69	74	187	97	164	77	154	245	56	240	14	145	108	131	69	24	101	80	91	129	45	83	248	232	481	99	225	501	235	428	557	672	682
Endogenous	SREBF1	NM_001005291.1	106	98	318	195	336	122	235	351	65	516	24	187	314	275	184	73	232	197	283	448	138	188	418	472	1345	358	1183	998	912	1051	1605	1370	2891
Endogenous	SSR2	NM_003145.3	55	29	254	216	322	113	143	405	40	524	20	312	220	246	107	62	251	180	386	285	156	217	382	860	1462	467	560	1857	1003	1314	1709	2134	2490
Endogenous	SSR4	NM_006280.1	98	94	276	249	388	115	328	493	44	636	25	328	383	402	162	114	288	368	629	446	334	327	733	1651	2313	965	817	2808	1820	2271	2499	2594	3709
Endogenous	STAT1	NM_139266.1	416	184	542	854	360	444	427	611	119	830	32	451	668	800	171	135	678	227	391	400	399	291	2088	1782	2226	517	904	1920	1210	1630	2002	3227	2431
Endogenous	STAT3	NM_003150.3	240	142	669	432	687	339	461	934	120	1162	57	526	1623	1016	632	474	946	997	765	835	780	707	1827	2070	3150	1074	2252	3718	2693	3393	3923	5088	6503
Endogenous	STAT5A	NM_003152.2	70	44	84	84	55	40	97	140	25	112	4	54	58	74	30	42	81	130	63	66	46	67	148	197	299	133	242	328	268	325	479	405	534
Endogenous	STAT5B	NM_012448.3	55	61	95	80	49	34	83	154	47	113	4	60	88	71	22	13	57	68	68	68	52	69	290	147	468	55	199	490	180	446	540	699	609
Endogenous	STK4	NR_147975.1	27	17	55	48	51	23	84	103	11	50	2	48	80	79	38	21	80	59	69	82	78	90	96	287	527	160	252	545	301	570	825	824	633
Endogenous	SUFU	NM_001178133.1	34	17	79	40	87	35	36	76	16	128	6	97	27	31	27	5	29	27	68	61	21	36	119	159	241	63	123	261	152	331	301	288	257
Endogenous	SUGT1	NM_001130912.1	46	30	164	94	136	54	117	190	33	219	14	123	109	74	35	48	72	79	137	104	87	100	357	273	510	153	253	506	364	508	631	674	937
Endogenous	SYK	NM_003177.5	66	68	118	80	78	36	103	123	49	118	4	42	119	181	66	47	116	41	116	137	100	138	82	457	638	186	311	568	483	357	676	534	585
Endogenous	TBC1D4	NM_014832.2	72	78	152	138	86	42	175	273	57	225	5	115	39	47	20	7	32	34	99	90	60	53	351	91	420	74	181	568	184	427	725	839	720
Endogenous	TBL1XR1	NM_024665.4	61	60	318	176	331	118	188	323	51	642	23	320	159	142	81	27	113	105	230	225	125	168	599	446	918	206	400	1073	452	999	1027	1421	1510
Endogenous	TBX21	NM_013351.1	62	62	88	55	21	35	101	127	62	54	4	25	30	34	17	10	19	17	5	9	25	14	10	35	75	17	50	46	39	115	133	186	38
Endogenous	TCF7L1	NM_031283.1	67	65	142	80	58	49	127	152	59	130	4	76	82	101	36	8	63	44	72	90	48	49	222	218	234	88	165	383	217	270	307	348	449
Endogenous	TCF7L2	NM_001146274.1	105	94	288	123	124	135	224	292	94	304	19	170	156	276	128	42	141	106	105	195	94	143	571	222	632	106	340	731	407	911	931	1016	892
Endogenous	TCL1A	NR_049726.1	40	42	57	43	8	16	85	85	34	33	1	19	3	7	2	1	3	1	1	3	1	1	4	4	8	10	1	5	3	5	10	5	5
Endogenous	TEK	NM_000459.3	3	4	7	7	5	2	7	47	2	11	1	4	36	37	24	9	24	65	54	37	72	54	88	105	504	33	209	570	152	672	838	799	547
Endogenous	TGFB1	NM_000660.3	284	181	701	245	448	207	430	834	183	777	46	483	464	803	479	631	970	510	595	670	752	409	471	1549	1521	2263	1352	1658	3255	1661	2304	1679	2143
Endogenous	TGFB1I1	NM_001042454.1	158	118	735	333	436	222	341	606	155	724	37	696	326	285	153	46	247	145	499	478	300	205	1911	400	1053	319	697	1717	693	1674	1041	1177	1523
Endogenous	TGFBR1	NM_004612.2	66	67	283	186	278	105	200	253	51	275	17	252	147	143	73	41	108	106	132	141	129	115	433	399	803	242	445	720	408	735	992	967	1511
Endogenous	TGFBR2	NM_001024847.1	124	135	371	258	282	206	294	726	86	583	25	300	549	666	343	179	579	500	637	690	677	513	1879	1260	2711	1180	1808	3625	2635	3347	4944	4555	4400
Endogenous	THBS1	NM_003246.2	571	376	1215	1441	1401	1137	866	1785	489	1159	86	1486	7642	2408	2167	2853	6165	4477	1834	3213	1963	2303	1977	3584	4572	5235	13321	12617	15355	7245	6716	11649	52926
Endogenous	THBS2	NM_003247.2	462	152	2715	1516	2232	1495	1154	1679	497	2324	189	4542	206	76	68	6	57	72	342	218	74	39	987	125	287	140	232	442	85	310	223	226	1151
Endogenous	THBS3	NM_001252607.1	100	92	286	105	229	92	187	465	74	354	29	359	36	75	53	23	44	55	114	122	70	89	241	164	272	165	338	366	300	313	383	345	483
Endogenous	TIMP1	NM_003254.2	382	238	1987	1149	3301	357	776	1834	121	4470	82	1651	2028	763	924	247	991	442	5479	2024	646	536	3050	7369	5637	2822	2655	17914	1881	4025	2766	2373	22297
Endogenous	TIMP2	NM_003255.4	829	384	4884	1783	3777	1796	1861	3349	708	6254	329	5709	630	890	504	309	753	734	1152	1277	791	559	4004	1813	3285	1795	2747	4115	3350	3983	3721	3525	3974
Endogenous	TJP1	NM_003257.3	90	78	335	252	214	134	231	623	101	518	22	327	351	225	112	34	146	202	237	305	169	204	783	317	1239	134	652	2091	437	2299	2378	3513	2383
Endogenous	TJP2	NM_004817.2	25	31	56	32	46	37	50	121	15	112	5	48	108	69	49	40	54	91	93	106	61	57	175	153	365	60	225	371	186	505	421	496	504
Endogenous	TLN1	NM_006289.3	381	259	1403	855	1190	657	812	1768	301	1761	89	1641	1643	1269	808	302	983	855	1410	1503	1043	1106	6160	2495	5892	1222	2990	7875	3346	8056	6991	8482	7698
Endogenous	TLR1	NM_003263.3	124	100	225	183	88	64	188	215	89	211	8	86	145	133	45	67	97	114	147	106	137	106	245	593	713	338	351	752	654	390	1007	887	799
Endogenous	TLR2	NM_003264.3	204	128	283	196	196	103	207	292	103	363	12	108	339	388	177	190	290	313	292	252	385	269	210	1575	1329	765	896	1202	1560	938	1706	1845	2753
Endogenous	TLR4	NM_138554.2	100	83	153	102	87	73	138	235	40	167	7	76	424	269	116	108	145	191	219	188	211	241	342	895	1108	331	793	1113	695	903	1390	1524	1485
Endogenous	TLR6	NM_006068.2	80	53	104	90	30	19	99	123	44	63	5	52	23	16	9	4	14	16	32	21	18	31	23	135	126	56	93	86	94	71	165	131	123
Endogenous	TLR8	NM_016610.2	38	36	105	50	27	50	101	69	35	38	4	33	34	42	24	13	43	27	23	27	41	37	38	212	209	108	88	144	215	134	413	339	393
Endogenous	TM6SF2	NM_001001524.2	64	79	105	64	31	41	105	120	53	39	5	47	5	4	6	3	7	3	7	5	5	4	18	9	16	18	13	29	25	28	31	33	34
Endogenous	TNF	NM_000594.2	55	36	69	52	16	26	76	76	33	40	4	29	18	24	10	6	56	25	13	18	11	11	27	38	40	34	34	81	103	162	135	103	106
Endogenous	TNFRSF17	NM_001192.2	103	88	133	105	23	30	136	164	73	75	6	57	36	10	7	2	3	9	8	8	6	13	5	45	40	7	32	19	48	57	80	68	78
Endogenous	TNFSF10	NM_003810.2	138	135	680	196	379	98	308	383	94	910	31	244	287	370	123	85	306	223	239	258	430	317	292	525	2714	415	734	1440	864	1361	2427	1479	695
Endogenous	TNFSF14	NM_003807.3	41	57	46	45	13	14	43	63	34	25	2	11	78	39	15	51	113	72	25	38	27	16	105	92	147	79	153	60	350	88	107	122	149
Endogenous	TNN	NM_022093.1	45	44	75	43	21	20	81	104	30	58	4	36	1	2	1	1	1	1	1	1	1	2	6	6	9	3	2	8	5	7	8	10	14
Endogenous	TPR	NM_003292.2	24	23	128	69	143	50	85	163	24	253	7	114	120	108	32	22	86	96	120	106	84	90	325	216	503	158	286	518	302	477	611	743	705
Endogenous	TPSAB1/B2	NM_003294.3	285	225	597	367	253	137	648	1196	126	764	53	379	657	888	753	88	923	1009	1910	870	434	2192	316	636	3998	1131	3125	10117	2050	6035	4259	5426	6559
Endogenous	TRADD	NM_003789.2	39	38	81	49	60	34	47	91	31	89	5	52	39	54	32	49	91	32	55	47	62	43	61	140	137	207	107	127	252	153	147	161	151
Endogenous	TRAF2	NM_021138.3	85	51	87	65	37	41	103	114	38	99	6	55	46	50	30	23	77	58	54	44	37	50	68	112	187	73	95	191	166	170	228	294	331
Endogenous	TRAF6	NM_145803.2	67	68	200	131	73	47	172	244	77	165	7	101	69	82	50	27	73	75	72	101	60	62	169	171	277	106	221	391	260	358	532	501	628
Endogenous	TRAT1	NM_016388.2	88	59	117	107	21	28	125	114	51	84	4	43	21	16	11	8	41	18	9	10	26	11	11	58	67	41	57	33	65	83	61	116	101
Endogenous	TRIB3	NM_021158.3	59	43	63	49	15	30	93	105	36	51	7	35	57	34	15	7	13	14	25	35	6	14	7	63	95	48	36	158	47	75	84	214	133
Endogenous	TRRAP	NM_003496.2	85	61	234	109	181	110	154	267	80	316	16	203	250	207	139	135	196	155	276	271	208	187	459	528	772	409	558	878	774	881	1099	1118	981
Endogenous	TTN	NM_133432.1	48	64	82	82	32	28	115	230	61	68	4	44	55	63	60	14	39	219	51	187	44	160	12020	252	529	152	486	551	811	463	841	792	1017
Endogenous	TXN	NM_003329.2	423	199	1077	652	914	381	505	1306	124	2305	50	807	600	971	540	424	842	899	1256	877	661	714	1173	5230	4028	1926	1660	4797	3617	2550	3968	5509	6683
Endogenous	TXN2	NM_012473.3	114	85	273	153	150	82	200	296	57	338	19	195	120	160	79	36	118	81	229	164	114	129	551	499	807	203	343	1072	447	807	1024	981	1249
Endogenous	TXNDC5	NM_030810.2	359	268	646	530	670	370	769	1179	181	1013	50	916	719	444	274	330	588	472	1003	548	596	509	621	2390	1997	2254	1349	2202	2654	2129	2791	2364	3501
Endogenous	UBA52	NM_003333.3	519	402	1557	1243	1620	731	1104	2186	343	2946	98	1498	1491	1539	628	544	1411	1108	2110	1782	1327	1283	3557	4982	7550	3228	3929	8773	7628	6357	8924	9049	12425
Endogenous	UBE2D2	NM_181838.1	45	56	204	191	161	88	139	296	34	390	8	179	91	132	75	33	126	163	161	138	133	153	487	386	668	277	357	838	504	816	1041	1270	1665
Endogenous	UBE2N	NM_003348.3	55	76	177	128	92	58	145	196	66	176	7	142	81	51	25	10	51	68	61	73	55	63	231	149	343	84	155	349	288	294	485	635	810
Endogenous	UBE4B	NM_006048.4	110	95	311	187	212	90	211	373	84	412	19	168	119	144	71	21	76	62	163	153	95	100	545	279	696	124	304	801	284	775	727	950	740
Endogenous	UQCRB	NM_006294.3	39	35	62	51	22	14	74	89	39	49	4	47	17	9	5	2	3	9	10	7	6	7	64	10	49	12	34	79	26	83	110	104	52
Endogenous	UQCRFS1	NM_006003.2	158	120	329	233	167	116	319	446	106	365	21	221	155	215	123	79	153	154	220	199	153	151	1044	710	893	353	487	963	726	782	1000	970	1363
Endogenous	UQCRH	NM_006004.2	228	168	521	264	350	203	428	615	164	631	29	465	422	528	241	280	469	361	823	604	480	396	1896	2019	1961	1689	1148	2249	2630	1406	2178	1587	2062
Endogenous	VAMP8	NM_003761.4	67	41	214	82	134	62	90	196	27	345	14	96	151	242	111	128	254	137	215	172	198	156	65	726	689	660	467	742	926	634	782	773	704
Endogenous	VAV1	NM_005428.2	7	7	13	18	13	13	16	22	2	22	1	3	25	39	12	9	30	15	20	29	29	33	45	154	247	45	63	170	136	124	215	207	265
Endogenous	VCAM1	NM_001078.3	68	51	128	184	77	72	131	99	48	123	11	57	79	23	11	18	57	76	30	41	19	13	138	82	124	56	97	66	66	96	61	62	318
Endogenous	VEGFA	NM_001025366.1	88	81	193	93	139	124	157	438	56	308	12	145	1014	488	242	70	361	458	315	443	218	301	546	506	1433	303	1230	2132	679	2600	2109	3598	5253
Endogenous	VEGFB	NM_003377.3	81	59	177	100	138	91	148	244	41	221	2	199	118	209	93	29	93	116	167	174	96	127	527	342	626	197	387	846	402	663	654	798	615
Endogenous	VIM	NM_003380.2	2006	1042	6326	3491	7360	3051	3006	8373	1005	9946	392	7788	3325	5294	3459	1653	4975	3791	7750	7591	3398	3050	19856	11028	18756	9903	16139	27268	20574	20631	25111	21492	43131
Endogenous	WAS	NM_000377.2	88	34	103	91	75	38	108	90	27	51	1	30	208	189	78	59	158	87	119	131	137	142	135	660	768	292	303	641	552	553	888	838	821
Endogenous	WWC1	NM_001161662.1	10	9	91	57	39	37	58	93	14	180	3	48	135	92	69	74	138	100	78	114	77	125	3	361	516	200	296	544	524	506	728	920	943
Endogenous	XAF1	NM_199139.2	103	93	142	100	61	89	138	162	56	150	10	107	233	229	51	66	136	56	103	112	170	37	580	249	382	169	314	298	308	447	408	463	207
Endogenous	XBP1	NM_005080.2	457	517	1513	409	668	279	897	783	253	1245	46	493	1303	923	644	1141	1683	1097	922	714	1204	717	519	3052	2941	4454	2363	2136	5382	1915	2644	2557	2991
Endogenous	XCL1/2	NM_003175.3	150	114	179	156	23	36	220	234	104	93	5	74	12	20	8	2	23	46	3	9	7	7	9	24	42	14	9	30	34	83	54	85	116
Endogenous	XIAP	NM_001167.3	84	82	268	189	204	116	252	297	74	251	10	251	210	103	58	44	110	97	175	130	111	102	406	329	654	188	389	961	246	892	955	1109	1097
Endogenous	YWHAB	NM_003404.4	240	131	677	322	493	237	395	737	125	863	34	444	604	652	358	493	955	561	845	602	831	541	1036	2130	2867	2900	1684	3000	4189	2613	4246	3592	3722
Endogenous	YWHAE	NM_006761.4	146	103	483	462	552	248	360	780	117	1189	36	552	468	355	166	66	230	308	503	405	284	366	1575	1221	2753	350	915	3288	1042	2692	3063	4553	5236
Endogenous	YWHAG	NM_012479.3	171	148	579	329	557	306	323	682	109	749	23	682	676	490	263	164	349	442	513	395	340	320	1942	1017	1801	408	1009	2459	1174	1734	1875	2735	4930
Endogenous	YWHAQ	NM_006826.2	247	209	831	616	779	564	562	1195	197	1500	55	1143	427	475	259	121	287	462	783	572	398	377	1548	1488	2215	754	1264	3223	1734	2363	2840	3740	4428
Endogenous	ZFYVE16	NM_001105251.2	100	93	222	175	148	86	207	303	77	299	13	156	179	126	55	13	64	92	138	140	84	135	402	249	656	110	288	740	240	622	705	898	1059
Housekeeping	ACAD9	NM_014049.4	63	39	152	81	69	57	93	199	39	196	10	120	83	98	59	54	99	51	125	94	83	82	230	283	402	189	236	531	373	443	632	593	609
Housekeeping	ARMH3	NM_024541.2	42	38	109	67	101	79	90	148	34	165	10	99	202	153	90	67	193	114	159	195	157	146	258	456	631	313	430	686	669	629	919	901	707
Housekeeping	CNOT10	NM_001256741.1	55	59	131	94	55	41	102	170	46	170	6	59	41	54	24	14	52	35	72	69	30	46	112	142	278	81	122	263	186	267	378	388	395
Housekeeping	GUSB	NM_000181.3	136	105	360	229	262	149	230	482	92	496	18	189	211	377	185	157	319	203	370	415	290	305	376	1116	1493	1100	888	1568	1776	1274	2055	1618	2090
Housekeeping	MTMR14	NM_022485.3	76	73	129	94	86	49	136	206	50	121	3	86	156	161	89	51	144	85	128	187	130	141	249	473	596	297	357	779	655	663	984	967	843
Housekeeping	NOL7	NM_016167.3	24	21	121	134	155	57	78	192	18	267	3	122	177	152	51	33	131	68	171	134	94	113	531	359	576	148	302	1043	450	735	981	1266	1509
Housekeeping	NUBP1	NM_002484.3	104	96	209	121	84	79	199	257	91	202	13	120	118	144	62	47	100	85	118	120	101	104	221	336	469	249	301	535	403	393	556	553	642
Housekeeping	PGK1	NM_000291.2	327	229	872	437	665	336	544	1011	212	1109	36	597	891	931	542	506	1184	714	1138	759	884	617	1997	3544	3588	2671	1963	4033	4297	2966	4499	3728	7114
Housekeeping	PPIA	NM_021130.3	1954	1740	4723	3317	2648	1378	4092	6564	1597	5174	232	2934	1651	2468	1104	684	2286	1634	3724	2434	2150	1766	3127	8585	11378	6224	4864	14881	10990	10294	15000	15044	20306
Housekeeping	RPLP0	NM_001002.3	1202	1008	3858	2058	3777	1443	2296	5529	626	6303	264	3701	3207	4171	2213	1409	2927	2269	7808	6741	3298	3555	4874	13347	18950	8912	8871	25010	17254	14656	17690	15222	28634
