# Supplementary material for: Comparative Analysis of Gene Expression in Fibroblastic Foci in Patients with Idiopathic Pulmonary Fibrosis and Pulmonary Sarcoidosis
Source: Cells. 2022 Feb 14;11(4):664. doi: 10.3390/cells11040664 (PMC8870272; doi:10.3390/cells11040664)
Supplement: Supplementary file 1 [file cells-11-00664-s001.zip › Supplementary files/Table S4.xlsx]

## Sheet: Sarcoidosis_vs_controls
Gene	p-value fdr	p-value holm
GREM1	3.07751e-11	3.07751e-11
IRS1	3.13881e-11	6.26821e-11
GCNT1	3.1874e-11	9.53356e-11
PRKAB2	3.66824e-10	1.4607e-09
GLI2	3.68909e-08	1.8335e-07
EPAS1	8.13855e-08	4.84658e-07
LOXL2	9.18075e-08	6.3688e-07
COL7A1	2.02771e-07	1.60517e-06
ALDH7A1	2.07509e-07	1.84521e-06
FAP	2.14921e-07	2.12026e-06
HKDC1	4.62734e-07	5.01387e-06
GPX3	6.51193e-07	7.68564e-06
COL1A1	8.74477e-07	1.1164e-05
KIF3A	1.28799e-06	1.846e-05
MAML1	1.28799e-06	1.8915e-05
RETN	2.25618e-06	3.52883e-05
GPX2	2.65596e-06	4.40699e-05
ATF7IP	2.98016e-06	5.48769e-05
ACOX2	2.98016e-06	5.50973e-05
MMP1	3.83719e-06	7.4561e-05
CAT	5.48693e-06	0.000111776
PGM1	6.24365e-06	0.000133042
VCAM1	6.78668e-06	0.000150953
ELOVL6	8.22014e-06	0.000190491
HLA-E	9.25582e-06	0.000223082
UBE4B	9.30041e-06	0.000248432
CSNK2A1	9.30041e-06	0.000248432
PANX1	9.30041e-06	0.000249886
GOT2	1.09565e-05	0.000304421
ARHGEF6	1.12597e-05	0.000323125
LPAR5	1.26081e-05	0.000373298
COL3A1	1.44323e-05	0.000440401
BRPF3	1.70748e-05	0.000536475
COL16A1	2.26889e-05	0.000733314
ERC1	2.34224e-05	0.000778058
NDUFS3	3.00268e-05	0.00103633
COL1A2	3.00268e-05	0.00106883
RAB7B	3.00268e-05	0.00107782
KLKB1	3.01169e-05	0.00110774
CSF3R	3.31288e-05	0.00124778
TM6SF2	3.31813e-05	0.00127897
HIKESHI	3.36902e-05	0.00134135
CYP4A11/22	3.36902e-05	0.00135759
SIL1	3.48481e-05	0.00143461
NEDD8	3.95093e-05	0.00166537
FRS2	3.95093e-05	0.001695
PNPLA3	5.20814e-05	0.00227926
PPARA	5.44581e-05	0.00243007
SDC3	5.68625e-05	0.00258605
CCR4	5.71537e-05	0.00264806
CYP2E1	6.02718e-05	0.00284378
CD86	6.36085e-05	0.00305511
DDR2	6.79643e-05	0.0033217
HDAC4	7.11515e-05	0.00353734
TGFBR2	7.45185e-05	0.0037672
ACVRL1	7.84964e-05	0.00403387
MBTPS2	7.94127e-05	0.00414706
MMP7	8.29954e-05	0.00448602
CYP2J2	8.29954e-05	0.0046183
PTCH1	8.29954e-05	0.00464513
DERL2	8.29954e-05	0.00467779
NPHP4	8.29954e-05	0.00477961
GLI3	8.29954e-05	0.00478578
ITGB3	8.29954e-05	0.00481075
COL14A1	8.80629e-05	0.00517568
NCAM1	9.16494e-05	0.00551572
LOXL4	9.16494e-05	0.00553381
TEK	9.28903e-05	0.005683
C6	9.36245e-05	0.00583277
ATP6V1G2	9.36245e-05	0.00587676
FST	9.65765e-05	0.00613839
THBS3	9.89738e-05	0.0064261
MAPK9	9.89738e-05	0.00659729
KIR2DL3	9.89738e-05	0.00660881
P3H3	9.89738e-05	0.00660881
PECAM1	0.000104083	0.00702217
ARRB1	0.000121889	0.00831767
CFLAR	0.000131651	0.00908508
CDON	0.000154053	0.0107491
XIAP	0.000167032	0.0117823
UBE2N	0.000189914	0.0135887
THBS2	0.000189914	0.0136846
PTPN11	0.000197842	0.0144051
CD36	0.00021556	0.0158572
ZFYVE16	0.000238315	0.0177095
FCRL2	0.00024115	0.0182172
IL6ST	0.00024115	0.018279
LPCAT1	0.000248698	0.0190351
FZD2	0.000261389	0.0203787
CFH	0.000261389	0.0203907
IL2RA	0.000263031	0.0207109
IFI35	0.000281286	0.022353
MKI67	0.00032993	0.0264576
FGF2	0.000365741	0.0295932
SP1	0.000382136	0.0311944
POSTN	0.000425526	0.035041
UQCRB	0.00043495	0.0361269
CXCR6	0.000436951	0.0366032
TNFRSF17	0.000437835	0.0370874
CAPN5	0.000437835	0.0372946
SMURF1	0.000439381	0.0377341
CASP3	0.000490743	0.0427653
DYNLL1	0.000490743	0.0428932
HMOX1	0.000490743	0.0432988
SRC	0.000490743	0.0435057
KLRD1	0.000492353	0.043986
CASP6	0.000517711	0.0466048
CCNA2	0.000522736	0.0474125
FASN	0.00053855	0.0492112
STK4	0.000546986	0.0503505
MMRN1	0.000563356	0.0523354
RAC3	0.000563356	0.0526114
PIK3R4	0.000638029	0.0603099
GSK3B	0.000638029	0.0604313
MAPK10	0.000663656	0.0632957
CXCL10	0.000696958	0.0669288
ATF4	0.000767322	0.0741867
MMP2	0.000785451	0.0764498
JUN	0.000857183	0.083986
GNPTAB	0.000933533	0.0920676
S100A4	0.000939683	0.0932762
XCL1/2	0.000965401	0.0969872
LIPG	0.000965401	0.0970575
APC	0.00108808	0.110078
SOS1	0.00108957	0.110914
EPHX2	0.0011198	0.114692
HSBP1	0.00116831	0.120388
ICOS	0.00117295	0.121593
VEGFA	0.0012466	0.130736
PPIA	0.0012466	0.130762
SERPING1	0.00125583	0.132498
CSNK1G3	0.00127421	0.135211
IL21R	0.00132414	0.141311
ANAPC10	0.00133705	0.144802
COL5A1	0.00133705	0.145056
PLCG1	0.00133705	0.14509
IGF1	0.00141761	0.154673
NOS1	0.00144715	0.158748
SMAD6	0.00146305	0.162453
FABP4	0.00146305	0.162453
JAK1	0.00147933	0.16487
MTMR4	0.0014895	0.167168
LTA	0.0014895	0.16772
IFNGR1	0.00154196	0.174509
ROCK2	0.00160636	0.183123
CXCL2	0.00160636	0.18362
IL6	0.00170364	0.195699
COL6A5	0.00180048	0.207832
SPOPL	0.00188832	0.219023
TBX21	0.00205297	0.239257
F5	0.00222355	0.260362
JMJD4	0.00225724	0.265543
EEF2K	0.00237374	0.280542
COL6A3	0.00240711	0.285791
ARHGEF2	0.00242026	0.288656
RIPK3	0.00250107	0.299634
RNF111	0.00261732	0.315439
GZMH	0.00261732	0.316343
INPP5D	0.00270249	0.328061
DAXX	0.00287595	0.350625
SMAD3	0.00298645	0.365652
HSD17B4	0.00309038	0.379978
SLC25A13	0.0031483	0.38872
FAS	0.00320759	0.397684
HADH	0.00321394	0.40243
CD180	0.00321394	0.40243
CTBP2	0.00324242	0.406923
SKP2	0.00339416	0.427664
GAB1	0.00340379	0.430569
PC	0.00340642	0.432584
MARCO	0.00350277	0.446541
CUL1	0.00373294	0.477705
NID1	0.00405018	0.521646
LPL	0.00405018	0.522219
PIK3CB	0.00408958	0.529258
PHLPP1	0.00417807	0.542699
CXCL11	0.00449264	0.585685
TBC1D4	0.00450574	0.589511
RAPGEF1	0.00453924	0.596013
CD14	0.00459615	0.605618
ATG2B	0.00487797	0.645002
GZMA	0.00505621	0.673544
PGK1	0.00505621	0.673544
CNOT10	0.00506121	0.676142
PSMD13	0.0051298	0.687608
ADH1B	0.0051957	0.698759
HCAR2	0.0052064	0.702506
CD8B	0.00537277	0.727319
FADD	0.00546635	0.742377
NCF4	0.00547932	0.746516
CXCL16	0.00571196	0.785696
LATS1	0.00571196	0.788591
TRAT1	0.00571196	0.788591
CCR7	0.00571196	0.788591
MOB1B	0.00572907	0.792722
TRADD	0.00584806	0.811619
PPARG	0.0058736	0.817591
CD3D	0.00603209	0.842126
LOXL1	0.00619718	0.867698
ADPGK	0.0062252	0.874138
CD6	0.00644426	0.907483
CD3G	0.00644434	0.910061
FLT4	0.00662099	0.943782
PTK2	0.00662099	0.943782
MET	0.00662099	0.945657
PARP1	0.00662099	0.945657
CD68	0.00773917	1
LAMA3	0.00780911	1
BAX	0.00813761	1
TXN2	0.00813807	1
NCK2	0.00841683	1
PLCB3	0.00941811	1
YWHAB	0.00957524	1
ITGA9	0.00968047	1
ATP6V1E1	0.00981456	1
TCF7L1	0.0100265	1
SNAI2	0.0100399	1
ELN	0.0109456	1
TLR6	0.0109456	1
ARHGAP35	0.0110338	1
COX4I2	0.011115	1
GPC4	0.0112642	1
ICAM1	0.0112642	1
MMP14	0.0114093	1
KMT2D	0.0120646	1
GNG2	0.0121133	1
FGA	0.0121194	1
OGT	0.0124159	1
RPS6KB2	0.012446	1
PPM1A	0.0126561	1
BRAF	0.0128614	1
SIRT1	0.0128965	1
SERPINE1	0.0128965	1
SEH1L	0.0130216	1
ACSL4	0.0135887	1
SERPINF1	0.0138649	1
CD209	0.0139043	1
PELI2	0.0146057	1
TRAF6	0.0148241	1
SLC25A10	0.0148241	1
CD163	0.0148241	1
SCIN	0.0150631	1
TIMP2	0.0151878	1
SEC24C	0.0151946	1
TGFB1I1	0.0159179	1
THBS1	0.016385	1
HIF3A	0.0164233	1
HSPG2	0.0164233	1
CFI	0.0167681	1
UQCRFS1	0.0173952	1
IRF1	0.0182228	1
CD44	0.0187365	1
TNF	0.0187438	1
HSP90AB1	0.0187438	1
CXCL12	0.0193227	1
CKAP4	0.0200451	1
TPSAB1/B2	0.0200541	1
DUSP7	0.0201558	1
ARMH3	0.020253	1
SLC37A4	0.021459	1
PSMC3	0.0217903	1
DIAPH1	0.0222304	1
ITGA4	0.0222986	1
ERP29	0.0231915	1
DDIT3	0.0231915	1
OCLN	0.0236653	1
FCER1G	0.023667	1
IL18R1	0.0239337	1
RAP1B	0.0242107	1
ANGPTL4	0.0242107	1
LYN	0.0254734	1
TRIB3	0.0254967	1
TLR4	0.0255488	1
GAS1	0.0262196	1
PRKAG2	0.0262196	1
MYD88	0.0267828	1
CYBB	0.0268753	1
JAG2	0.0269112	1
CCL2	0.0277448	1
KAT6A	0.02844	1
FN1	0.0284467	1
APLP2	0.0298759	1
CD84	0.0298759	1
S100A12	0.0300505	1
ADIPOR1	0.030251	1
RORA	0.0304215	1
PIK3C3	0.0304792	1
VAV1	0.0309935	1
STAT3	0.0309935	1
CYFIP1	0.0313213	1
SSR4	0.031549	1
MAP3K1	0.0332836	1
KDM3B	0.0338642	1
ATP7A	0.0351249	1
NFKB1	0.0357927	1
RPS27A	0.0360236	1
SELENOS	0.03619	1
DUSP8	0.0365821	1
C5	0.0365893	1
SMAD4	0.0365893	1
GZMB	0.0371947	1
PDE3B	0.0371947	1
ADAM17	0.0371947	1
P2RY13	0.0371967	1
HCK	0.0373329	1
PRKAG1	0.0374536	1
RAC2	0.0381413	1
TCF7L2	0.0381413	1
NCOA2	0.0385424	1
PLCG2	0.0389861	1
SMARCC2	0.0389861	1
KLRK1	0.0419908	1
ACTA2	0.0419908	1
HDC	0.0419908	1
CCR2	0.0422756	1
COL5A3	0.0422756	1
NUBP1	0.042991	1
NFAM1	0.0432386	1
SUFU	0.0432386	1
SPP1	0.0448464	1
SERPINH1	0.0448493	1
PPARGC1A	0.0448629	1
MUC5B	0.0462219	1
MAML3	0.0473057	1
IFI6	0.0478129	1
LAMTOR4	0.0478129	1
CASP7	0.0478129	1
NDUFB5	0.048438	1
GBP5	0.048444	1
RNF152	0.0484768	1
RELB	0.0493371	1
PCCB	0.0523935	1
PTPN1	0.0525544	1
ACSM3	0.0525544	1
TLR8	0.0533102	1
TRAF2	0.0534901	1
PRKACA	0.0535143	1
CCL13	0.0541215	1
TGFBR1	0.0544624	1
ITPR2	0.0544624	1
GUSB	0.0544651	1
GATA3	0.0553986	1
RPS6KA2	0.0556423	1
TJP2	0.0570415	1
MAML2	0.0570415	1
NCSTN	0.0570415	1
YWHAQ	0.0570415	1
CHI3L1	0.0570415	1
PLCB2	0.0582399	1
CD8A	0.0583045	1
NCEH1	0.0583533	1
CXCL8	0.0590481	1
DOCK2	0.0604967	1
ITCH	0.0618292	1
AXL	0.0623733	1
MYLK	0.0623733	1
GRB10	0.0624114	1
ATG101	0.0624114	1
LOX	0.0624114	1
ACTR1A	0.0626593	1
FABP5	0.0645807	1
SP3	0.0646541	1
CFTR	0.0661368	1
NDUFB8	0.0665432	1
CDH5	0.0679091	1
IL2RB	0.0679091	1
PLIN4	0.0691411	1
DERL1	0.0738798	1
UQCRH	0.0739248	1
CSF1R	0.0746759	1
WWC1	0.0791707	1
F8	0.0792158	1
BANF1	0.0807937	1
LGALS3	0.0808149	1
CCL4	0.0815799	1
CYP27A1	0.0815799	1
PRKDC	0.086353	1
CDK4	0.086353	1
WAS	0.0866488	1
RPLP0	0.0890433	1
COX7B	0.089449	1
TXNDC5	0.0899447	1
NDUFA1	0.0906261	1
C4BPA	0.0944355	1
BCAP31	0.0949124	1
PTPN6	0.0952099	1
FBP1	0.0957388	1
EP300	0.09712	1
PRKCA	0.0973388	1
PTGS2	0.098953	1
IRF4	0.100574	1
PREX1	0.100574	1
CDKN2C	0.102285	1
STAT1	0.102423	1
PDE2A	0.102864	1
VAMP8	0.102864	1
LTB	0.102864	1
RAPGEF2	0.104273	1
MMP9	0.104678	1
PPARD	0.105418	1
CBL	0.106774	1
CTNND1	0.10935	1
EGR1	0.10935	1
LILRB2	0.109782	1
CXCR1	0.109782	1
LRRC32	0.110912	1
NOTCH1	0.110946	1
ERN1	0.114452	1
CTSD	0.114735	1
MAPK11	0.115245	1
PRDX1	0.115245	1
CCN2	0.11612	1
RAC1	0.116627	1
MLXIPL	0.11668	1
CARD9	0.118659	1
PDGFB	0.125962	1
CASP4	0.128993	1
CRKL	0.129939	1
LIPA	0.13093	1
PSMB8	0.130977	1
MTOR	0.134175	1
CTSW	0.138296	1
ALAD	0.142548	1
PRDX6	0.148872	1
ADA2	0.149299	1
PTPA	0.149299	1
PDHA1	0.149299	1
SOD1	0.150073	1
C1S	0.153132	1
PROS1	0.155667	1
FPR1	0.157479	1
CRK	0.158899	1
KANSL1	0.159114	1
NCKAP1L	0.165212	1
MS4A4A	0.166029	1
FLT1	0.166029	1
CTSL	0.167758	1
C3AR1	0.167972	1
HSD11B1	0.1726	1
DEPDC5	0.172863	1
VEGFB	0.174137	1
NRP2	0.175858	1
MMUT	0.17748	1
FLNB	0.177869	1
FZD5	0.178467	1
PSMB7	0.180131	1
TLR1	0.180642	1
CSNK2B	0.180696	1
OAS1	0.180879	1
GNLY	0.180879	1
CTNNB1	0.180933	1
NLRC4	0.182586	1
EGFR	0.183021	1
TRRAP	0.184354	1
COX6B1	0.190916	1
MAPK1	0.191752	1
FCGR3A/B	0.1931	1
EP400	0.19491	1
XAF1	0.196433	1
SKI	0.202322	1
HTRA2	0.203305	1
AKT1	0.208332	1
NOTCH4	0.212282	1
NCF1	0.213615	1
OASL	0.218304	1
NUMB	0.22246	1
MTMR14	0.229155	1
FNIP2	0.231718	1
PIK3CA	0.232397	1
TTN	0.233273	1
OSBPL5	0.238217	1
EHMT1	0.240117	1
TBL1XR1	0.242089	1
ITGA1	0.246159	1
CUL3	0.246159	1
ADCY7	0.251518	1
INSR	0.251518	1
FCAR	0.252278	1
AMOTL1	0.254253	1
BCL2L1	0.256814	1
NOS3	0.262699	1
PIK3R5	0.272196	1
IL1B	0.282247	1
HLA-G	0.283043	1
PSMB1	0.284877	1
NF1	0.285653	1
NOL7	0.285653	1
STAT5A	0.290457	1
PPP2CA	0.296272	1
NDUFC1	0.298812	1
AP1G1	0.301552	1
STAT5B	0.301622	1
ALDH3A2	0.315513	1
NDUFS5	0.318784	1
AP2S1	0.321271	1
FGD2	0.322151	1
NPC1	0.32596	1
PLTP	0.326848	1
UBA52	0.32802	1
TLR2	0.332681	1
LGMN	0.333273	1
HVCN1	0.333273	1
IRF3	0.335824	1
SSR2	0.339279	1
PTK2B	0.344545	1
IL33	0.345693	1
KLRB1	0.345693	1
CEBPA	0.345693	1
BST2	0.345693	1
TNFSF10	0.373211	1
CCL19	0.388646	1
TLN1	0.389936	1
ACACB	0.392593	1
PTAFR	0.395274	1
LAMTOR2	0.39608	1
TGFB1	0.39608	1
C3	0.39608	1
CD34	0.397594	1
SPOP	0.397671	1
HLA-DRA	0.40439	1
DLL4	0.405253	1
CSNK1D	0.405253	1
CHUK	0.407293	1
ACAD9	0.417981	1
IRAK3	0.417981	1
COX7C	0.417981	1
IFI27	0.418123	1
GNB4	0.418508	1
APP	0.418948	1
ERO1A	0.43616	1
NOTCH3	0.444083	1
HLA-B	0.444083	1
NDUFB6	0.444281	1
DAPK1	0.444281	1
PDGFRB	0.444281	1
RBX1	0.446137	1
GPR65	0.44725	1
CREB3	0.467844	1
NR1H3	0.47371	1
SEC61B	0.47857	1
LRP1	0.47857	1
JAK2	0.47857	1
JAG1	0.482941	1
MFAP3	0.484956	1
MEFV	0.491025	1
SAA1	0.491025	1
LRP2	0.492703	1
HLA-DQA1	0.505021	1
CIITA	0.506949	1
CCR1	0.512678	1
SCD	0.517707	1
IRF8	0.519428	1
FLI1	0.526543	1
CREBBP	0.526543	1
NID2	0.527196	1
ANAPC7	0.527824	1
IQGAP1	0.543437	1
RELA	0.543453	1
ACACA	0.543453	1
DOCK1	0.544036	1
ALDH9A1	0.552941	1
HSP90AA1	0.559634	1
COL4A1	0.559634	1
PHYKPL	0.5632	1
NR1H2	0.565123	1
KDM5D	0.565123	1
BCL2	0.576286	1
CHMP4B	0.579057	1
KDR	0.581435	1
CR1	0.588699	1
TPR	0.601566	1
LRP6	0.601566	1
YWHAG	0.601566	1
ISG20	0.601566	1
KRAS	0.601566	1
HCFC1	0.601822	1
ABCA1	0.601822	1
SIGLEC5	0.606115	1
CTSB	0.608705	1
AP1S1	0.618786	1
TXN	0.623001	1
SUGT1	0.625556	1
ITGB1	0.634199	1
LAMC1	0.642462	1
IL1RAP	0.646146	1
E2F4	0.646146	1
NOTCH2	0.646146	1
CD3E	0.646146	1
NKG7	0.646146	1
CD4	0.649144	1
ITGA5	0.653117	1
ISG15	0.66402	1
CPT1A	0.664515	1
PIDD1	0.669017	1
SKP1	0.676429	1
MECP2	0.677905	1
HIF1A	0.679779	1
PELI1	0.680069	1
IL10RA	0.681567	1
ATOX1	0.691788	1
MS4A1	0.691885	1
PTPRC	0.699257	1
COX6A1	0.704358	1
CXCR4	0.70842	1
ATP6V1F	0.717997	1
IGF1R	0.724855	1
LATS2	0.724855	1
PARP4	0.733797	1
P4HB	0.734938	1
MAP1LC3A	0.739656	1
SREBF1	0.739656	1
PSEN2	0.739656	1
IKBKB	0.742589	1
CSNK1A1	0.745699	1
UBE2D2	0.748424	1
CPA3	0.751332	1
ADAM9	0.767631	1
FURIN	0.780156	1
KLF5	0.787942	1
TJP1	0.794813	1
MAPK8	0.795495	1
HLA-DPA1	0.797006	1
CSNK1E	0.803428	1
IL1R1	0.816493	1
HLA-A	0.816937	1
PSENEN	0.817516	1
MEF2A	0.821164	1
FGG	0.826297	1
NCOR2	0.826297	1
NLRP3	0.827559	1
MAF	0.829178	1
CDKN1A	0.833172	1
BIRC3	0.833172	1
TNFSF14	0.834517	1
PRF1	0.83931	1
PTPN12	0.83931	1
PRKACB	0.840442	1
YWHAE	0.845618	1
DLL1	0.855953	1
LDLRAP1	0.856429	1
LEPR	0.888639	1
AMOTL2	0.895734	1
FCER1A	0.898779	1
SYK	0.905539	1
FGL2	0.909051	1
PTGER4	0.913056	1
KDM2A	0.913056	1
TIMP1	0.913056	1
ACAA2	0.913056	1
CCS	0.914129	1
CREB1	0.929327	1
CYCS	0.930094	1
HLA-F	0.933508	1
GBP4	0.933508	1
ILK	0.934699	1
MAP2K1	0.934699	1
XBP1	0.945609	1
PRKAA1	0.962721	1
VIM	0.962721	1
SORBS1	0.968072	1
HADHA	0.970015	1
CALM1	0.970505	1
RASGRP4	0.971526	1
SMAD2	0.983617	1
ANAPC1	0.985567	1
F11R	0.987083	1
CASP8	0.990544	1
COL4A2	0.99851	1

## Sheet: IPF_vs_controls
Gene	p-value fdr	p-value holm
IRS1	7.03869e-11	7.03869e-11
ALDH7A1	7.46139e-08	1.84128e-07
GNG2	7.46139e-08	2.23172e-07
FAP	3.35577e-07	1.33628e-06
COL1A1	4.44397e-07	2.20868e-06
KLKB1	1.14829e-06	6.83814e-06
ACOX2	2.34146e-06	1.6243e-05
GPX3	3.40886e-06	2.69851e-05
GREM1	4.05684e-06	3.60743e-05
GAB1	4.49262e-06	4.43209e-05
CYP2J2	4.89498e-06	5.55874e-05
GCNT1	4.89498e-06	5.77724e-05
CDON	5.80939e-06	7.41653e-05
GLI3	7.06704e-06	9.70131e-05
C6	8.90658e-06	0.000130985
COL3A1	8.90658e-06	0.000139305
MMP7	9.6495e-06	0.000160112
HMOX1	1.00034e-05	0.000183737
ARHGEF6	1.00034e-05	0.000184944
COL14A1	1.04441e-05	0.000203912
CXCL11	1.04441e-05	0.00021276
TNFRSF17	1.3536e-05	0.000288429
COL1A2	1.35763e-05	0.000301972
CSNK2A1	1.42726e-05	0.000330749
CYBB	1.68344e-05	0.000405738
HKDC1	1.71511e-05	0.000429239
ICOS	1.82868e-05	0.000474527
KIF3A	2.11788e-05	0.000569038
IL6	2.13991e-05	0.000594561
COL7A1	2.51517e-05	0.000721793
UQCRB	3.10374e-05	0.000918948
PRKAB2	4.06769e-05	0.00126863
ANAPC10	4.06769e-05	0.00127803
THBS2	4.16195e-05	0.00134516
CYP4A11/22	4.17562e-05	0.00138708
GLI2	4.89921e-05	0.00169962
LPAR5	4.89921e-05	0.00171502
MET	5.40626e-05	0.00194059
COL5A1	5.54764e-05	0.0020405
XCL1/2	5.93057e-05	0.00223373
DDR2	5.9315e-05	0.00229578
LPCAT1	5.9315e-05	0.00238314
KIR2DL3	5.9315e-05	0.00239018
PTPN11	6.66699e-05	0.00274465
POSTN	6.90018e-05	0.00290056
PANX1	7.83804e-05	0.00336261
HADH	8.2562e-05	0.00374095
HIKESHI	8.2562e-05	0.00374538
FASN	8.2562e-05	0.00375484
ELOVL6	8.91459e-05	0.004196
FZD2	8.91459e-05	0.00426544
EPAS1	8.91459e-05	0.00432116
MAPK9	8.91459e-05	0.00435694
GPX2	9.36482e-05	0.00475948
SIL1	9.36482e-05	0.00482031
FRS2	9.36482e-05	0.00482031
GOT2	9.51551e-05	0.00496915
CXCL2	0.000113271	0.00600914
NCAM1	0.000114033	0.0061438
PSMD13	0.000116122	0.00635192
PNPLA3	0.000122472	0.00679978
PTCH1	0.000125452	0.00706776
RAB7B	0.000131998	0.00754405
JUN	0.000137813	0.00798821
ZFYVE16	0.000203294	0.0119481
ARRB1	0.000203723	0.0121374
FCRL2	0.000209238	0.0126338
NDUFS3	0.000249036	0.0152359
ATP6V1G2	0.000260473	0.0161431
UBE4B	0.000261645	0.0164233
IRF1	0.000287592	0.0183633
TM6SF2	0.000287592	0.0185057
CCL2	0.000340938	0.0222059
PLCG1	0.000351574	0.0231734
BRPF3	0.000365416	0.0247888
MBTPS2	0.000365416	0.0249452
COL6A3	0.000365416	0.0249452
NEDD8	0.000366163	0.0252686
CYP2E1	0.000373562	0.0261535
PGM1	0.000373562	0.0263507
CXCL16	0.000382811	0.0274661
LOXL1	0.000382811	0.0275842
UBE2N	0.000390221	0.0284125
CASP3	0.000411007	0.030469
CD44	0.000411007	0.0305425
TLR4	0.000411913	0.0309169
PRKAG1	0.000412549	0.0312709
LOXL4	0.000470844	0.0360379
CD68	0.000485726	0.0375366
HDAC4	0.000485726	0.0379661
PGK1	0.000485726	0.0382458
FST	0.000521559	0.0414468
MKI67	0.000544317	0.0436497
RPS6KB2	0.000616455	0.0498794
IFI35	0.000633728	0.0517323
CD14	0.000645214	0.053542
COL16A1	0.000645214	0.0535914
CSF3R	0.000654846	0.0548561
P3H3	0.000656851	0.0554882
CCNA2	0.000665929	0.0567236
FCER1G	0.000670212	0.0575579
NOS1	0.000692488	0.0599542
KMT2D	0.000698528	0.0609623
CD36	0.000760739	0.0671305
LTA	0.000760739	0.0674416
LOXL2	0.000769593	0.0691292
HLA-E	0.000769593	0.0692795
RAC3	0.000902181	0.0818283
TRAT1	0.000923792	0.0844136
VEGFA	0.000971523	0.0911934
SMAD3	0.000971523	0.0911934
PPIA	0.000971523	0.0913756
PIK3R4	0.000971523	0.0913756
CASP6	0.00110252	0.104426
SRC	0.00122484	0.118424
MMP2	0.00122484	0.118463
COL5A3	0.00122484	0.118463
SPOPL	0.00124806	0.121477
TLR6	0.00127539	0.125744
THBS3	0.00127539	0.125783
CD3G	0.0013294	0.132374
CCR4	0.0013294	0.133537
IFI6	0.0013294	0.133653
F5	0.00134609	0.136181
SLC25A13	0.00137889	0.140367
FBP1	0.00146918	0.150476
S100A12	0.00154319	0.159435
KLRD1	0.00154319	0.159974
CCL4	0.00156618	0.164244
EEF2K	0.00156618	0.164284
PPARG	0.00157784	0.166622
CD163	0.00157784	0.168122
ERC1	0.00157784	0.168385
CXCR6	0.00160502	0.172251
S100A4	0.00160702	0.173428
SIRT1	0.00165234	0.179303
CFH	0.00173233	0.189011
FLT4	0.00180726	0.198252
JAG2	0.00191847	0.211578
PPARGC1A	0.0019278	0.213732
ADH1B	0.00257887	0.287412
HCAR2	0.00264634	0.296462
CD8B	0.00265957	0.299472
PDE3B	0.00266599	0.304985
NCKAP1L	0.00266599	0.306604
CASP4	0.00266599	0.306995
PPARA	0.00266599	0.307247
CNOT10	0.00266599	0.307738
ATF7IP	0.00267084	0.311293
VCAM1	0.00267084	0.311293
ITGB3	0.00309203	0.362055
FAS	0.00310915	0.366258
CCR7	0.00310915	0.367457
SOS1	0.00326418	0.387548
IGF1	0.0033351	0.397902
ACSL4	0.0033351	0.399553
PARP1	0.003377	0.406373
CTBP2	0.00349916	0.424428
MAML1	0.00349916	0.427131
ELN	0.00349916	0.427131
TBC1D4	0.00366332	0.448527
MMP14	0.00366736	0.45092
OCLN	0.00367017	0.453157
SP1	0.0037593	0.466085
APC	0.00386436	0.481078
CKAP4	0.00390338	0.488762
SMARCC2	0.00390338	0.489874
PIK3CB	0.00411223	0.51814
HSD17B4	0.00419209	0.530286
MAPK10	0.0043757	0.558852
TGFBR2	0.0043757	0.558852
CAPN5	0.00468495	0.599534
PTK2	0.00474167	0.609092
ITGA9	0.00487463	0.628521
MMRN1	0.00493943	0.642447
FABP4	0.00493943	0.642447
NCF4	0.00497501	0.648568
PHLPP1	0.00510578	0.668017
ACVRL1	0.00516081	0.680895
HSBP1	0.00516081	0.680895
TRIB3	0.00526139	0.695701
MMP1	0.00538034	0.715498
HIF3A	0.00538034	0.716343
RORA	0.00550433	0.735338
DERL2	0.00575041	0.770796
ATP6V1E1	0.00582692	0.783651
NPHP4	0.0059134	0.797901
BANF1	0.00602816	0.81604
HCK	0.00611944	0.831071
FCGR3A/B	0.00620536	0.845434
TIMP2	0.00630842	0.862195
SERPINF1	0.00650806	0.892267
ITPR2	0.00671396	0.923351
THBS1	0.00686667	0.94725
FN1	0.00698805	0.970389
IFNGR1	0.00698805	0.971312
IL2RA	0.00698805	0.97272
JMJD4	0.007448	1
SERPINH1	0.00761848	1
HSPG2	0.00797587	1
PSMC3	0.00804694	1
CTSD	0.00805941	1
IL21R	0.00823048	1
GNPTAB	0.00884157	1
SDC3	0.00899186	1
CASP7	0.00899186	1
RNF111	0.009191	1
LIPG	0.009191	1
CSNK1G3	0.00955123	1
FGF2	0.00982129	1
MTMR4	0.0100835	1
MAML2	0.010547	1
TRAF6	0.010547	1
PECAM1	0.0107396	1
CXCL10	0.0107661	1
SKP2	0.0107772	1
EPHX2	0.0110696	1
TBX21	0.0111381	1
TGFB1I1	0.0119505	1
PC	0.0120985	1
RAPGEF1	0.0123206	1
NDUFB5	0.0123206	1
UQCRFS1	0.0127197	1
DYNLL1	0.0127659	1
PTPN6	0.0136934	1
ACTA2	0.0140854	1
LAMA3	0.0140854	1
SMAD6	0.0145886	1
TEK	0.0149116	1
TRAF2	0.0149712	1
MYLK	0.0151417	1
GZMA	0.0157685	1
MARCO	0.0171816	1
CD86	0.0171817	1
XIAP	0.0171817	1
GZMH	0.0173564	1
COL6A5	0.0175817	1
FGD2	0.0178513	1
AKT1	0.0181835	1
IL6ST	0.0183699	1
YWHAB	0.0184965	1
TCF7L2	0.0188521	1
C3	0.0189594	1
WAS	0.0190443	1
TNF	0.0199302	1
GPC4	0.0199871	1
CUL1	0.0211028	1
IL18R1	0.0211028	1
NFKB1	0.0212326	1
RETN	0.0213119	1
DOCK2	0.0217633	1
ACTR1A	0.0220304	1
DUSP7	0.0225398	1
FABP5	0.0225541	1
LYN	0.0227173	1
PDE2A	0.022937	1
P2RY13	0.0229631	1
INPP5D	0.0230413	1
ARHGAP35	0.0233684	1
CYP27A1	0.0255736	1
MS4A4A	0.0255736	1
HSD11B1	0.0255736	1
PROS1	0.0255736	1
ARHGEF2	0.0256076	1
CD180	0.0265058	1
YWHAQ	0.027516	1
LOX	0.0277254	1
SP3	0.0284087	1
COX4I2	0.0286211	1
MFAP3	0.029423	1
CTSL	0.0296759	1
NUBP1	0.0296759	1
LILRB2	0.0296759	1
PLCB2	0.0301262	1
PLCG2	0.0306876	1
FNIP2	0.0306876	1
PTGS2	0.0308049	1
ROCK2	0.0309634	1
RELB	0.0316269	1
LRP6	0.0329225	1
ALDH3A2	0.0332816	1
CXCL8	0.0334502	1
NID1	0.0340492	1
NCOA2	0.0351248	1
RAC2	0.0353346	1
KLRB1	0.0358604	1
AXL	0.0359977	1
LIPA	0.036644	1
STK4	0.0367163	1
DERL1	0.0367163	1
TLR2	0.0379677	1
GZMB	0.0386904	1
CYFIP1	0.0386904	1
ATG2B	0.0390822	1
KDM3B	0.0391669	1
CD6	0.0393385	1
GSK3B	0.0427192	1
NCK2	0.0427358	1
FADD	0.0427888	1
VAV1	0.0432653	1
PTPN1	0.0440662	1
ARMH3	0.0444134	1
DUSP8	0.0448089	1
PPM1A	0.0462401	1
CFLAR	0.0470783	1
DOCK1	0.0471428	1
COX7B	0.0476335	1
TXN2	0.0481597	1
RIPK3	0.0500841	1
KLRK1	0.050237	1
LATS1	0.050237	1
MOB1B	0.0507935	1
PLCB3	0.0518288	1
TJP1	0.0532792	1
LPL	0.0542392	1
EP300	0.0544658	1
ACSM3	0.057947	1
PDGFB	0.0584721	1
CFI	0.0587493	1
BAX	0.059109	1
C1S	0.0591579	1
ITGB1	0.0597415	1
APLP2	0.0600585	1
EGR1	0.0620117	1
LAMTOR4	0.0620117	1
ACAD9	0.0624214	1
RAPGEF2	0.0629004	1
PTPA	0.064059	1
RAP1B	0.0648279	1
SMURF1	0.0648279	1
PCCB	0.0648523	1
HLA-DQA1	0.0654256	1
HDC	0.0654256	1
SCIN	0.0709933	1
SELENOS	0.0720177	1
CCR2	0.0723504	1
HLA-F	0.0727863	1
CTNNB1	0.072933	1
HLA-DRA	0.0733453	1
CCN2	0.0769311	1
DIAPH1	0.0773312	1
FGA	0.0794916	1
C5	0.0794916	1
ITCH	0.0817385	1
CIITA	0.0818447	1
GRB10	0.0818447	1
FPR1	0.0818447	1
ADIPOR1	0.0822314	1
LAMC1	0.0825069	1
CXCR1	0.0825069	1
CDK4	0.0830805	1
SERPINE1	0.0834304	1
MUC5B	0.0841928	1
BRAF	0.0847501	1
TXNDC5	0.0852472	1
TBL1XR1	0.0852472	1
MAML3	0.0872291	1
SMAD4	0.0872291	1
TJP2	0.0895327	1
CDH5	0.0903052	1
ATF4	0.0918603	1
SERPING1	0.0924025	1
PTPRC	0.0938627	1
TGFBR1	0.0967167	1
HLA-B	0.0973636	1
FZD5	0.0975779	1
PSMB8	0.103039	1
CAT	0.104305	1
CD3D	0.108012	1
IRF8	0.109756	1
IRAK3	0.109756	1
OASL	0.109756	1
SNAI2	0.109883	1
PIK3CA	0.109883	1
MAPK11	0.109883	1
SCD	0.110407	1
FLT1	0.110451	1
GATA3	0.110451	1
IRF3	0.110451	1
PDGFRB	0.110451	1
NOTCH3	0.111097	1
ADCY7	0.111158	1
PREX1	0.113585	1
TCF7L1	0.113644	1
TRADD	0.114847	1
COL4A2	0.114847	1
PSMB7	0.115629	1
WWC1	0.116312	1
SEC61B	0.118211	1
BST2	0.118664	1
SKP1	0.119559	1
BCAP31	0.11998	1
PRKDC	0.121797	1
SUFU	0.123218	1
GBP5	0.123218	1
CHMP4B	0.125667	1
GUSB	0.127955	1
CD34	0.130771	1
DAXX	0.131973	1
COL4A1	0.132091	1
MAP3K1	0.134002	1
APP	0.134002	1
OGT	0.134002	1
RELA	0.134002	1
ACAA2	0.134002	1
JAK1	0.134002	1
PELI2	0.145027	1
DDIT3	0.146457	1
LRRC32	0.146652	1
RNF152	0.15073	1
ANGPTL4	0.152111	1
PTK2B	0.153284	1
KDM2A	0.156126	1
ADAM9	0.15901	1
SEC24C	0.160848	1
RPS27A	0.162601	1
MLXIPL	0.165602	1
RPS6KA2	0.166569	1
CCL13	0.168556	1
SUGT1	0.168556	1
MYD88	0.169559	1
ADPGK	0.169931	1
STAT3	0.169931	1
PRKACA	0.170736	1
IL10RA	0.170845	1
SYK	0.175631	1
MTMR14	0.180152	1
CD3E	0.180312	1
IRF4	0.180718	1
KAT6A	0.182209	1
ATP7A	0.187089	1
GAS1	0.189248	1
LRP1	0.189248	1
CSNK1A1	0.191218	1
NOL7	0.191218	1
ERP29	0.191224	1
SLC25A10	0.191224	1
CTSB	0.191224	1
NOS3	0.191256	1
ADAM17	0.194916	1
GNLY	0.194999	1
HLA-G	0.199223	1
PSMB1	0.200778	1
F8	0.207042	1
PDHA1	0.207673	1
NOTCH4	0.211627	1
P4HB	0.211965	1
CEBPA	0.213852	1
PARP4	0.213852	1
YWHAE	0.213852	1
TNFSF10	0.218528	1
HCFC1	0.220013	1
HIF1A	0.221606	1
NLRC4	0.221606	1
HLA-DPA1	0.222908	1
NF1	0.222908	1
CSNK2B	0.226594	1
PLIN4	0.22669	1
CALM1	0.228283	1
GPR65	0.228939	1
CPT1A	0.230966	1
ISG20	0.230966	1
NID2	0.237153	1
XAF1	0.237286	1
CFTR	0.237286	1
MAPK1	0.242828	1
NDUFA1	0.244093	1
NOTCH2	0.254515	1
SEH1L	0.254665	1
OSBPL5	0.257007	1
PTAFR	0.257007	1
CHUK	0.257007	1
HLA-A	0.262847	1
PELI1	0.265106	1
NPC1	0.270902	1
FLI1	0.272108	1
ATG101	0.275985	1
AP1S1	0.281009	1
HTRA2	0.281009	1
PRKACB	0.282653	1
NFAM1	0.283019	1
NDUFB8	0.287573	1
SLC37A4	0.297836	1
ICAM1	0.30721	1
HSP90AB1	0.307487	1
SSR4	0.307629	1
FGL2	0.308983	1
CD8A	0.311616	1
C3AR1	0.312213	1
MAP2K1	0.315574	1
CD209	0.320255	1
DLL1	0.320629	1
EGFR	0.323023	1
PIK3C3	0.324144	1
TPSAB1/B2	0.330976	1
BIRC3	0.331342	1
ALAD	0.334767	1
PSEN2	0.338371	1
CPA3	0.34708	1
LGMN	0.356854	1
NRP2	0.358193	1
TTN	0.35914	1
VAMP8	0.359323	1
CBL	0.361889	1
IL1B	0.365763	1
NKG7	0.365763	1
PTGER4	0.367234	1
NDUFS5	0.367457	1
PRKCA	0.377245	1
E2F4	0.382825	1
IKBKB	0.382825	1
PRDX1	0.386467	1
ACACA	0.386467	1
COX6B1	0.386505	1
NCOR2	0.386992	1
CRKL	0.387638	1
CASP8	0.389216	1
COX6A1	0.391373	1
NCEH1	0.394459	1
MMUT	0.396724	1
IFI27	0.405922	1
CRK	0.407854	1
DAPK1	0.409012	1
CREB1	0.410139	1
LGALS3	0.410949	1
ANAPC7	0.412781	1
CXCR4	0.419753	1
F11R	0.421273	1
SOD1	0.421273	1
ALDH9A1	0.423022	1
EHMT1	0.423022	1
LRP2	0.42754	1
AP2S1	0.439773	1
TNFSF14	0.443293	1
NOTCH1	0.444011	1
CXCL12	0.448978	1
DLL4	0.463267	1
XBP1	0.468879	1
HVCN1	0.470306	1
MS4A1	0.477136	1
KANSL1	0.484978	1
JAK2	0.494441	1
MMP9	0.496578	1
NLRP3	0.506733	1
IL1RAP	0.515511	1
NCSTN	0.515511	1
AMOTL2	0.522434	1
FCAR	0.532573	1
FLNB	0.532573	1
SMAD2	0.533524	1
PPARD	0.535267	1
STAT1	0.554237	1
CSNK1E	0.555604	1
NCF1	0.556029	1
PPP2CA	0.557475	1
INSR	0.564649	1
STAT5B	0.579367	1
MEF2A	0.58434	1
MAP1LC3A	0.589454	1
HADHA	0.589454	1
ITGA5	0.594977	1
CSNK1D	0.60145	1
CSF1R	0.605201	1
OAS1	0.605201	1
TLR8	0.606017	1
KDM5D	0.61709	1
EP400	0.61709	1
RPLP0	0.625078	1
TLR1	0.627923	1
PRKAG2	0.629151	1
PRKAA1	0.631541	1
ERN1	0.635898	1
PRDX6	0.646335	1
CR1	0.64637	1
ITGA1	0.648632	1
C4BPA	0.650809	1
IL33	0.651238	1
PIK3R5	0.651238	1
MTOR	0.659661	1
SPOP	0.666219	1
ACACB	0.666618	1
SAA1	0.670029	1
FGG	0.673055	1
UQCRH	0.677204	1
TPR	0.679152	1
ADA2	0.681147	1
GBP4	0.692034	1
MAF	0.695818	1
CUL3	0.696382	1
CREB3	0.696382	1
BCL2L1	0.701044	1
TXN	0.701527	1
LAMTOR2	0.70889	1
JAG1	0.714519	1
LATS2	0.718123	1
ITGA4	0.718123	1
ISG15	0.718179	1
NDUFC1	0.718179	1
VEGFB	0.718179	1
CYCS	0.72956	1
CCR1	0.73312	1
UBE2D2	0.73312	1
COX7C	0.73312	1
CTSW	0.73495	1
PHYKPL	0.73495	1
BCL2	0.73495	1
IGF1R	0.740898	1
STAT5A	0.745393	1
LTB	0.746818	1
SPP1	0.746818	1
PRF1	0.758634	1
CCL19	0.767064	1
PTPN12	0.768978	1
VIM	0.768978	1
RBX1	0.773119	1
MECP2	0.777282	1
NR1H2	0.78166	1
UBA52	0.785192	1
DEPDC5	0.786381	1
GNB4	0.788326	1
ILK	0.794962	1
CCS	0.795572	1
FCER1A	0.797823	1
KLF5	0.797823	1
CDKN2C	0.808384	1
CHI3L1	0.808384	1
SREBF1	0.813652	1
AMOTL1	0.813952	1
PLTP	0.815541	1
CDKN1A	0.816595	1
PSENEN	0.830833	1
YWHAG	0.831662	1
PIDD1	0.84351	1
MAPK8	0.844786	1
CD4	0.844823	1
LDLRAP1	0.847037	1
SSR2	0.854204	1
CARD9	0.866582	1
RASGRP4	0.876872	1
TGFB1	0.876872	1
RAC1	0.876872	1
KDR	0.884778	1
CREBBP	0.884778	1
IL1R1	0.902878	1
IL2RB	0.904583	1
LEPR	0.908804	1
ATOX1	0.908804	1
SKI	0.918868	1
AP1G1	0.920991	1
SIGLEC5	0.920991	1
TIMP1	0.920991	1
ATP6V1F	0.93331	1
NUMB	0.943146	1
HSP90AA1	0.95142	1
CD84	0.964945	1
NR1H3	0.967724	1
FURIN	0.96961	1
NDUFB6	0.96961	1
CTNND1	0.969889	1
KRAS	0.969889	1
IQGAP1	0.969889	1
TRRAP	0.969889	1
SORBS1	0.978156	1
ANAPC1	0.981796	1
TLN1	0.981796	1
ERO1A	0.987676	1
ABCA1	0.990582	1
MEFV	0.992286	1
